# Supplementary material for: Visible light-mediated radical-cascade addition/cyclization of arylacrylamides with aldehydes to form quaternary oxindoles at room temperature
Source: Royal Society of Chemistry journal article supplement (doi:10.1039/d2qo00319h), 2022-01-01

# Supporting Information

## Visible Light-Mediated Radical-Cascade

### Addition/Cyclization of Arylacrylamides with Aldehydes to Form Quaternary Oxindoles at Room Temperature

Zhaozhao Sun,<sup>a</sup> Huawen Huang,<sup>a,b,\*</sup> Qiaolin Wang,<sup>a</sup> Chunyan Huang,<sup>a</sup> Guojiang Mao,<sup>b</sup> and Guo-Jun Deng<sup>a,b,\*</sup>

<sup>a</sup> Key Laboratory for Green Organic Synthesis and Application of Hunan Province, Key Laboratory of Environmentally Friendly Chemistry and Application of Ministry of Education, College of Chemistry, Xiangtan University, Xiangtan 411105, China

E-mail: hwhuang@xtu.edu.cn; gjdeng@xtu.edu.cn

<sup>b</sup> School of Chemistry and Chemical Engineering, Henan Normal University, Xinxiang, 453007, P. R. China

#### List of contents

|                                                                                                    |     |
|----------------------------------------------------------------------------------------------------|-----|
| 1. General information .....                                                                       | S2  |
| 2. General procedure for synthesis of <b>3a</b> .....                                              | S3  |
| 3. Procedures for the preparation of acrylamides .....                                             | S4  |
| 3.1 General procedure for preparation of substrates <b>1a-1o</b> , <b>1s-1v</b> .....              | S4  |
| 3.2 Preparation of substrates <b>1p-1r</b> .....                                                   | S4  |
| 3.3 Preparation of substrates <b>1aa</b> , <b>1ba</b> , <b>1ca</b> and <b>1da</b> .....            | S5  |
| 4. Synthetic Application.....                                                                      | S5  |
| 4.1. Procedures for the scalable reaction.....                                                     | S5  |
| 4.2. Reductive cyclization of <b>6a</b> .....                                                      | S6  |
| 4.3. Reductive of <b>6a</b> to alcohol and dehydration to alkene .....                             | S6  |
| 5. Mechanistic studies.....                                                                        | S7  |
| 5.1. Radical trapping experiments.....                                                             | S7  |
| 5.2. Stern–Volmer quenching.....                                                                   | S9  |
| 6. Characterization of products .....                                                              | S12 |
| 6. References.....                                                                                 | S43 |
| 7. Copies of <sup>1</sup> H, <sup>13</sup> C and <sup>19</sup> F NMR spectra of all products ..... | S45 |

## 1. General information

The reactions via general procedure were carried out under an atmosphere of air unless otherwise noted. Column chromatography was performed using silica gel (200-300 mesh) or thin layer chromatography was performed using silica gel (GF254).  $^1\text{H}$ ,  $^{13}\text{C}$  and  $^{19}\text{F}$  NMR spectra were recorded on Bruker-AV (400, 100 and 376 MHz, respectively) instrument internally referenced to tetramethylsilane (TMS) or chloroform signals. Mass spectra were measured on Agilent 5977 GC-MS instrument (EI). High-resolution mass spectra (ESI) were obtained with the Agilent 1260 II/6230 mass spectrometer. Melting points were measured with a YUHUA X-5 melting point instrument and were uncorrected. The structures of known compounds were further corroborated by comparing their  $^1\text{H}$  NMR,  $^{13}\text{C}$  NMR data and HRMS data with those in literature. *N*-arylacrylamides were prepared according to known methods.<sup>[1,2]</sup> All other reagents were obtained from commercial suppliers and used without further purification.

## 2. General procedure for synthesis of **3a**

**Reaction device diagram:** A commercially available blue LED (35W, HIPAR30) was purchased from Shenzhen Jing Feng Times Lighting Technology Co., Ltd as the reaction light source. And flowing water was used to cool the temperature of reaction setup (Figure S1).

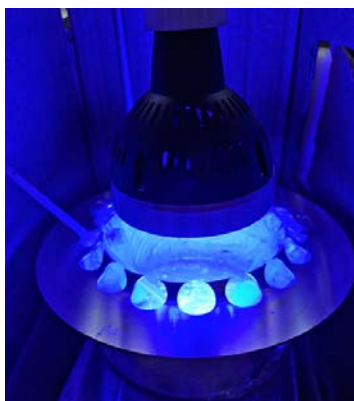

**Figure S1. Temperature controlled reaction setup (35 W blue LED)**

A 10 mL reaction vessel was charged with NaBr (10.2 mg, 0.1 mmol), 4CzIPN (1.6 mg, 0.002 mmol), *N*-methyl-*N*-phenylmethacrylamide (35.0 mg, 0.2 mmol), H<sub>2</sub>O (5.0 equiv), TBHP (19  $\mu$ L, 1.0 equiv) and Acetone (2.0 mL). Then, pivalaldehyde (43  $\mu$ L, 0.4 mmol, 2.0 equiv) was added by syringe under air. The resulting mixture was stirred for 24 h under irradiation with a 35 W blue LEDs at ambient temperature. After the reaction was completed, the crude reaction mixture was quenched with saturated sodium carbonate and extracted with ethyl acetate (3 $\times$ 10 mL). The extracts were combined, dried over sodium sulfate, and filtered, and the volatiles were removed under reduced pressure. Column chromatography was performed using silica gel (200-300 mesh) (petroleum ether/ethyl acetate = 10:1) to give product **3a** as a white solid (30.8 mg, 71%), mp: 91 – 93  $^{\circ}$ C.

### 3. Procedures for the preparation of acrylamides

#### 3.1 General procedure for preparation of substrates 1a-1o, 1s-1v <sup>1</sup>:

(a) To a solution of aniline **S1** (8.0 mmol) in CH<sub>2</sub>Cl<sub>2</sub> (20 mL) was added Et<sub>3</sub>N (2.2 mL, 16.0 mmol) at 0 °C. Methacryloyl chloride (0.93 mL, 9.6 mmol) was added by dropwise and the resulting solution was stirred at rt for 2 h. Then the reaction mixture was poured into water and the aqueous layer was extracted with CH<sub>2</sub>Cl<sub>2</sub> (3×15 mL). The combined organic layers were dried over Na<sub>2</sub>SO<sub>4</sub>, filtered and concentrated under reduced pressure. The crude product was purified by column chromatography (SiO<sub>2</sub>; gradient eluent: petroleum ether to 10% EtOAc in petroleum ether) to provide amide **S2** as white solid.

(b) To a solution of amide **S2** (6.5 mmol) in THF (20 mL) was added in portions NaH (7.8 mmol) at 0 °C. After stirring for 15 min at the same temperature, MeI or R-Br (7.8 mmol) was added. The mixture was warmed to rt and stirred for 5 h. Then the reaction was quenched by H<sub>2</sub>O (20 mL), and the aqueous layer was extracted with EtOAc (3×20 mL). The combined organic layers were dried over Na<sub>2</sub>SO<sub>4</sub>, filtered and concentrated under reduced pressure. The crude product was purified by column chromatography (SiO<sub>2</sub>; gradient eluent: petroleum ether to 5% EtOAc in petroleum ether) to provide amide product.

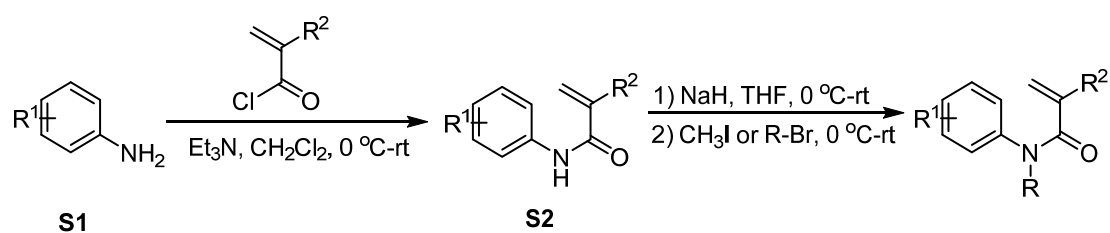

#### 3.2 Preparation of substrates 1p-1r <sup>2</sup>:

(c) To a 50 mL round-bottom flask equipped with a magnetic stir-bar was added solution of acrylic acid **S3** (1.5 g, 1.0 equiv) in dichloromethane (CH<sub>2</sub>Cl<sub>2</sub>, 20.0 mL), followed by dropwise addition of oxalyl chloride (2.0 equiv) and 2 drops of DMF under nitrogen atmosphere. The mixture was stirred at room temperature for 6 hours before removing all volatiles under reduced pressure. The crude product was used for the step (a) without purification.

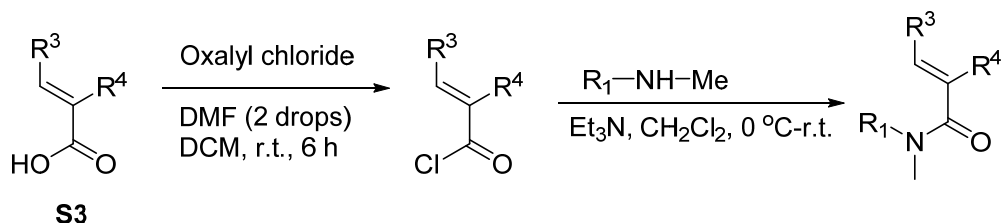

### 3.3 Preparation of substrates **1aa**, **1ba**, **1ca** and **1da**<sup>1f</sup>:

(d) To a solution of 2-anilinoethanol **S4** (0.137 g, 1.0 mmol), acid **S5** (1.0 equiv), DCC (0.412 g, 2.0 equiv), DMAP (32 mg, 0.5 equiv) was added in  $CH_2Cl_2$  (5.0 mL) at rt for 12-24 h. Then the reaction mixture was poured into water and the aqueous layer was extracted with  $CH_2Cl_2$  (3×15 mL). The combined organic layers were dried over  $Na_2SO_4$ , filtered and concentrated under reduced pressure. The crude product was purified by flash column chromatography ( $SiO_2$ ; gradient eluent: petroleum ether to 20% EtOAc in petroleum ether). The crude product was used for the step (a) to afford product **1aa**, **1ba**, **1ca** and **1da**.

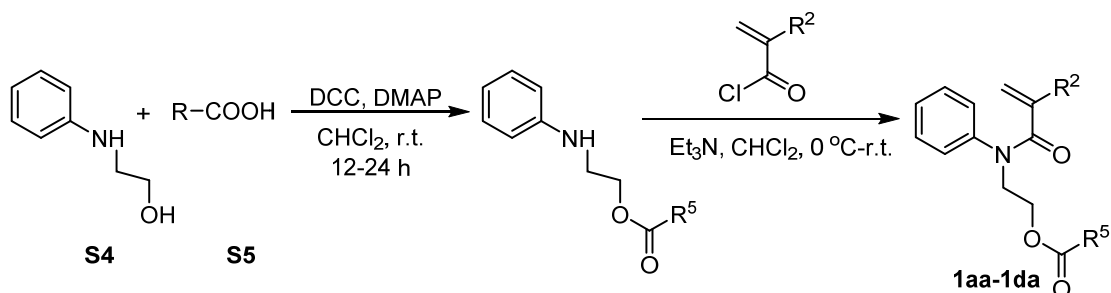

## 4. Synthetic Application

### 4.1. Procedures for the scalable reaction

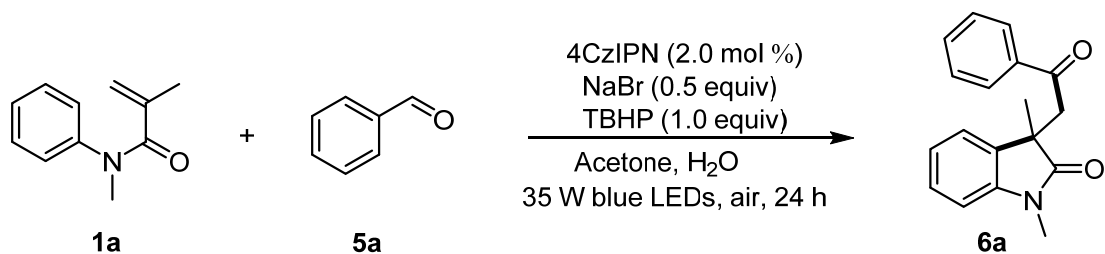

A 25 mL reaction vessel was charged with NaBr (102 mg, 1 mmol), 4CzIPN (16 mg, 0.02 mmol), *N*-methyl-*N*-phenylmethacrylamide (350 mg, 2 mmol),  $H_2O$  (50 equiv), TBHP (190  $\mu L$ , 10 equiv) and Acetone (10.0 mL). Then, benzaldehyde (410  $\mu L$ , 4 mmol, 2.0 equiv) was added by syringe

under air. The resulting mixture was stirred for 24 h under irradiation with a 35 W blue LEDs at ambient temperature. After the reaction was completed, the crude reaction mixture was quenched with saturated sodium carbonate and extracted with ethyl acetate (3×15 mL). The extracts were combined, dried over sodium sulfate, and filtered, and the volatiles were removed under reduced pressure. Column chromatography was performed using silica gel (200-300 mesh) (petroleum ether/ethyl acetate = 5:1) to give product **6a** as a colorless liquid. (295 mg, 53%).

#### 4.2. Reductive cyclization of **6a**

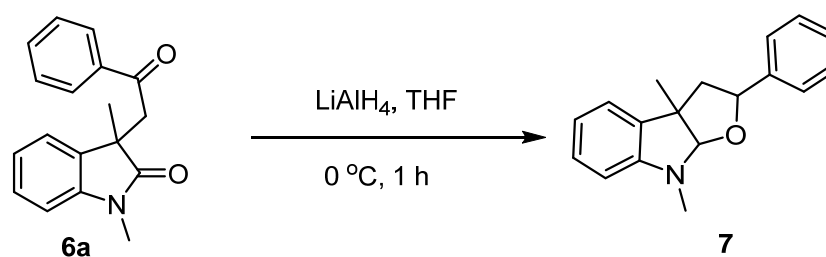

complete, the crude reaction mixture was filtered with ethyl acetate (3 x 10 mL). The residue was purified by flash column chromatography on silica gel with ethyl acetate/petroleum ether (1:5) to afford the product **8** (51.7 mg, 92%), dr (2:1).

To a stirred solution of **8** (56.2 mg, 0.2 mmol) in 2 mL of 1,4-dioxane, then added 2-3 drops of sulfuric acid dropwise (H<sub>2</sub>SO<sub>4</sub>) The resulting mixture was stirred at room temperature for 15 h under air. After the reaction was complete, the crude reaction mixture was filtered with ethyl acetate (3 x 10 mL). The residue was purified by column chromatography on silica gel with ethyl acetate/petroleum ether (1:20) to afford the product **9** (45.0mg, 86%).

## 5. Mechanistic studies

### 5.1. Radical trapping experiments

The following reaction was carried out under standard conditions: A 10 mL reaction vessel was charged with NaBr (10.2 mg, 0.1 mmol), 4CzIPN (1.6 mg, 0.002 mmol), **1a** (35.0 mg, 0.2 mmol), 2,2,6,6-tetramethyl-1-piperidinyloxy (TEMPO) (62.8 mg, 0.4 mmol, 2.0 equiv), or butylated hydroxytoluene (BHT) (88.0 mg, 0.4 mmol, 2.0 equiv), or 1,1-diphenylethylene (DPE) (71.0  $\mu$ L, 0.4 mmol, 2.0 equiv), H<sub>2</sub>O (5.0 equiv), TBHP (19  $\mu$ L, 1.0 equiv) and Acetone (2.0 mL), Then, **2a** (43  $\mu$ L, 0.4 mmol, 2.0 equiv) or **5a** (41  $\mu$ L, 0.4 mmol, 2.0 equiv) was added by syringe under air. The resulting mixture was stirred for 24 h under irradiation with a 35 W blue LED at ambient temperature. After completion, the consequence was detected by GC-MS.

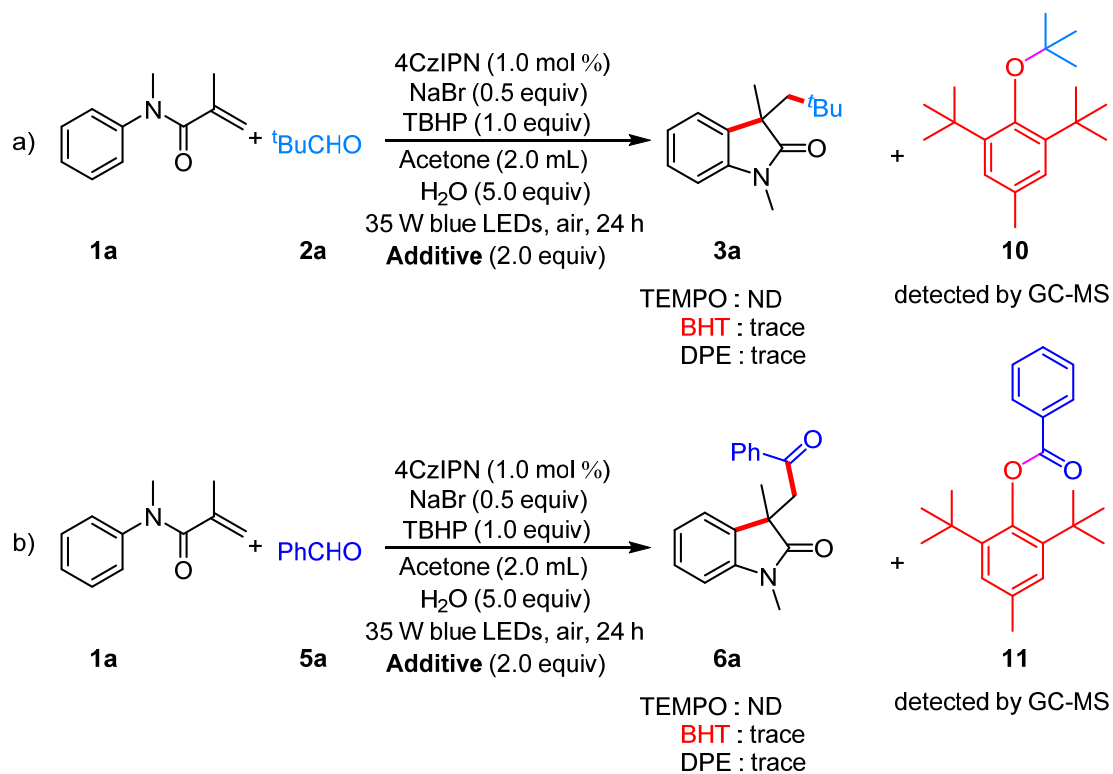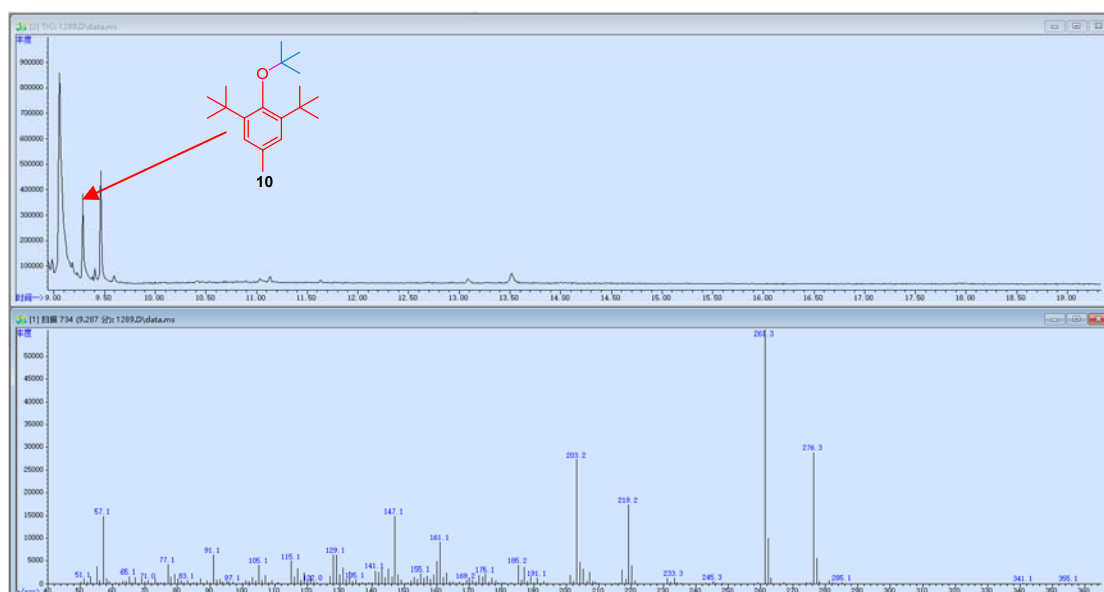

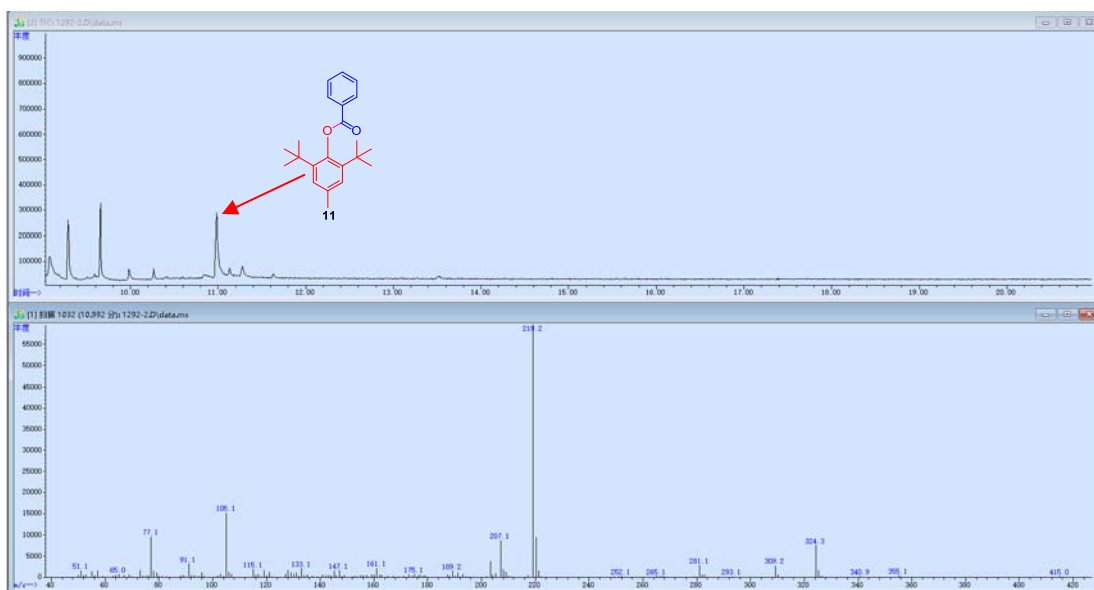

## 5.2. Stern–Volmer Quenching

**Formulation solution:** *N*-methyl-*N*-phenylmethacrylamide (175.0 mg) was dissolved in acetone in a 10 mL volumetric flask to set the concentration to be 0.1 M. Pivaldehyde (108  $\mu$ L) was dissolved in acetone in a 10 mL volumetric flask to set the concentration to be 0.1 M. NaBr (102.8 mg) was dissolved in acetone in a 10 mL volumetric flask to set the concentration to be 0.1 M. TBHP (96.0  $\mu$ L) was dissolved in acetone in a 10 mL volumetric flask to set the concentration to be 0.1 M. Benzaldehyde (106.0 mg) was dissolved in acetone in a 10 mL volumetric flask to set the concentration to be 0.1 M. Photocatalyst 4CzIPN (2.0 mg) was dissolved in acetone (25.0 mL) to set the concentration to be 0.1 mM.

**Experimental procedure:** The resulting 0.1 mM solution (20  $\mu$ L) was added to cuvette to obtain different concentrations of catalyst solution. This solution was then diluted to a volume of 2.0 mL by adding further solvent (acetone) to prepare a 1.0  $\mu$ M solution. The resulting mixture was sparged with argon for 3 minutes and then irradiated at 425 nm. Fluorescence emission spectra were recorded (3 trials per sample). Into this solution, 2.0  $\mu$ L of a *N*-methyl-*N*-phenylmethacrylamide solution was successively added and uniformly stirred, and the resulting mixture was bubbled with argon for 3 minutes and irradiated at 425 nm. Fluorescence emission spectra of 0  $\mu$ L, 2.0  $\mu$ L, 4.0  $\mu$ L, 6.0  $\mu$ L, 8.0  $\mu$ L, 10  $\mu$ L fluorescence intensity. Follow this method and make changes to the amount to obtain the Stern–Volmer relationship in turn.

(a) 4CzIPN quenched by NaBr in acetone.

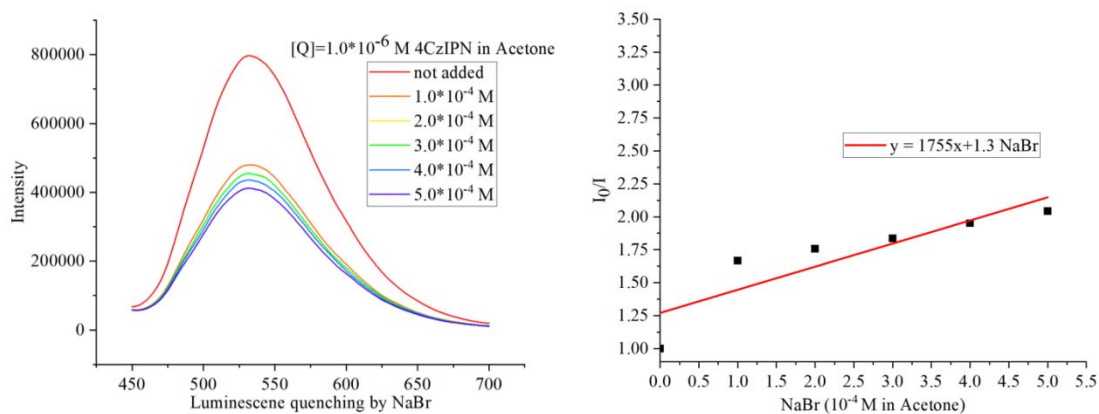

The emission intensity of the 4CzIPN catalyst solution strongly affected by the gradual increase of the amount of NaBr.

(b) 4CzIPN quenched by **1a** in acetone. Linear quenching is not observed.

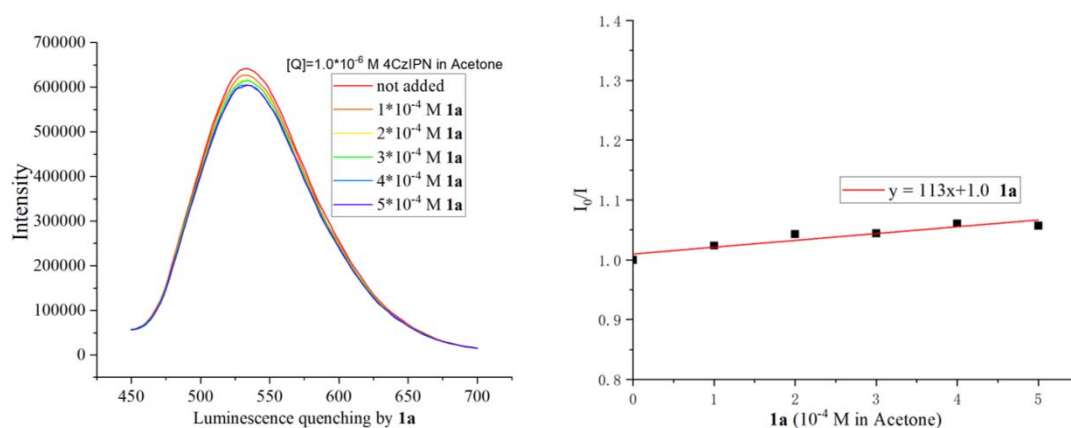

(c) 4CzIPN quenched by **2a** in acetone. Linear quenching is not observed.

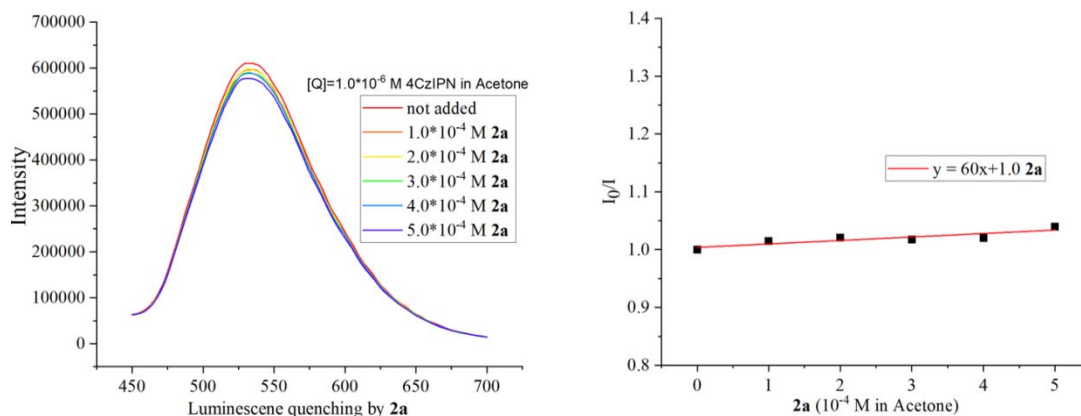

(d) 4CzIPN quenched by **5a** in acetone. Linear quenching is not observed.

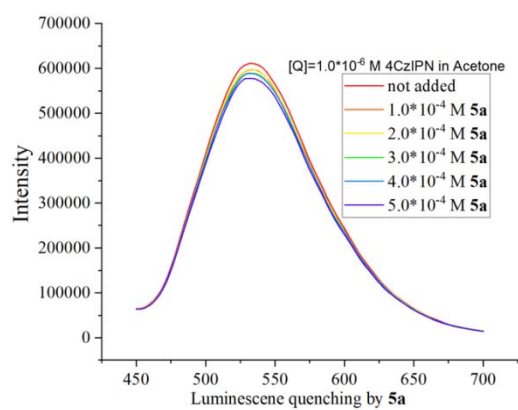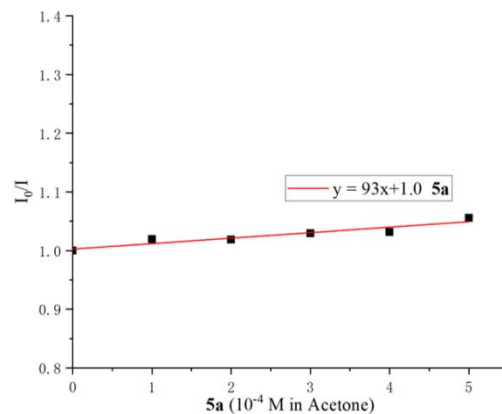

(e) 4CzIPN quenched by TBHP in acetone. Linear quenching is not observed.

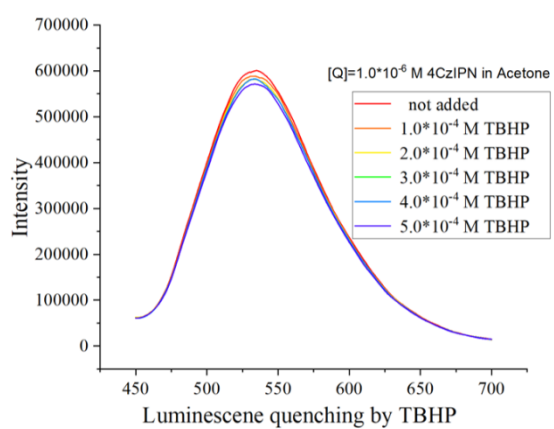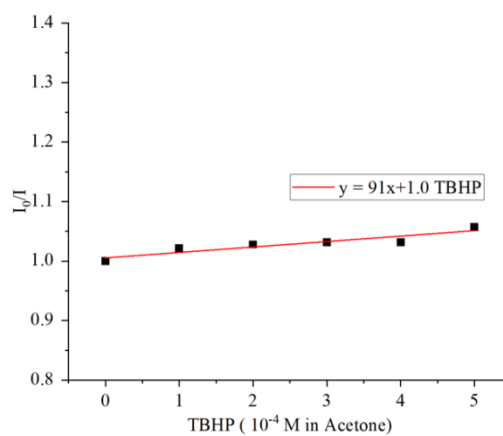

## 6. Characterization of products

### 1,3-Dimethyl-3-neopentylindolin-2-one (**3a**)<sup>3</sup>

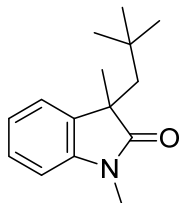

The reaction was conducted with *N*-methyl-*N*-phenylmethacrylamide (**1a**, 35.0 mg, 0.2 mmol), trimethylacetaldehyde (**2a**, 43.0  $\mu$ L, 0.4 mmol). Purification by thin layer chromatography was performed (petroleum ether/ethyl acetate = 10/1) to yield **3a** (30.8 mg, 71%) as a white solid, mp: 91 – 93 °C.

<sup>1</sup>H NMR (400 MHz, CDCl<sub>3</sub>, ppm)  $\delta$  7.29 – 7.24 (m, 1H), 7.20 (d,  $J$  = 7.2 Hz, 1H), 7.03 (t,  $J$  = 7.5 Hz, 1H), 6.85 (d,  $J$  = 7.8 Hz, 1H), 3.22 (s, 3H), 2.15 (d,  $J$  = 14.4 Hz, 1H), 1.86 (d,  $J$  = 14.4 Hz, 1H), 1.29 (s, 3H), 0.60 (s, 9H); <sup>13</sup>C NMR (100 MHz, CDCl<sub>3</sub>, ppm)  $\delta$  181.0, 142.8, 134.2, 127.5, 123.8, 122.0, 108.0, 50.7, 47.4, 31.8, 30.8, 28.2, 26.2. HRMS (ESI)  $m/z$  calcd for C<sub>15</sub>H<sub>22</sub>NO<sup>+</sup> (M+H)<sup>+</sup> 232.1696, found 232.1702.

### 5-Methoxy-1,3-dimethyl-3-neopentylindolin-2-one (**3b**)<sup>3</sup>

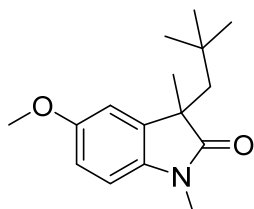

The reaction was conducted with *N*-(4-methoxyphenyl)-*N*-methylmethacrylamide (**1b**, 41.0 mg, 0.2 mmol), trimethylacetaldehyde (**2a**, 43.0  $\mu$ L, 0.4 mmol). Purification by thin layer chromatography was performed (petroleum ether/ethyl acetate = 10/1) to yield **3b** (32.3 mg, 62%) as a white solid, mp: 111 – 113 °C.

<sup>1</sup>H NMR (400 MHz, CDCl<sub>3</sub>, ppm)  $\delta$  6.83 (d,  $J$  = 2.2 Hz, 1H), 6.79 (d,  $J$  = 2.4 Hz, 1H), 6.77 (s, 1H), 3.80 (s, 3H), 3.20 (s, 3H), 2.15 (d,  $J$  = 14.4 Hz, 1H), 1.83 (d,  $J$  = 14.4 Hz, 1H), 1.29 (s, 3H), 0.63 (s, 9H); <sup>13</sup>C NMR (100 MHz, CDCl<sub>3</sub>, ppm)  $\delta$  180.7, 155.6, 136.4, 135.6, 111.6, 111.5, 108.2, 55.8, 50.7, 47.8, 31.7, 30.8, 28.3, 26.3.

### 1,3,5-Trimethyl-3-neopentylindolin-2-one (**3c**)<sup>3</sup>

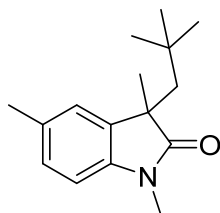

The reaction was conducted with *N*-methyl-*N*-(*p*-tolyl)methacrylamide (**1c**, 37.8 mg, 0.2 mmol), trimethylacetaldehyde (**2a**, 43.0  $\mu$ L, 0.4 mmol). Purification by thin layer chromatography was performed (petroleum ether/ethyl acetate = 10/1) to yield **3c** (33.3 mg, 68%) as a white solid, mp: 117 – 120 °C.

<sup>1</sup>H NMR (400 MHz, CDCl<sub>3</sub>, ppm)  $\delta$  7.04 (t,  $J$  = 9.0 Hz, 2H), 6.74 (d,  $J$  = 7.8 Hz, 1H), 3.20 (s, 3H), 2.34 (s, 3H), 2.14 (d,  $J$  = 14.3 Hz, 1H), 1.84 (d,  $J$  = 14.3 Hz, 1H), 1.28 (s, 3H), 0.61 (s, 9H); <sup>13</sup>C NMR (100 MHz, CDCl<sub>3</sub>, ppm)  $\delta$  181.0, 140.4, 134.2, 131.4, 127.7, 124.4, 107.7, 50.7, 47.4, 31.7, 30.8, 28.2, 26.2, 21.1.

### 5-(*tert*-Butyl)-1,3-dimethyl-3-neopentylindolin-2-one (**3d**)<sup>3</sup>

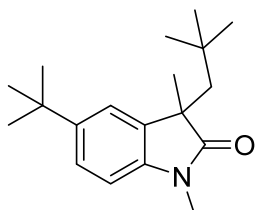

The reaction was conducted with *N*-(4-(*tert*-butyl)phenyl)-*N*-methylmethacrylamide (**1d**, 46.2 mg, 0.2 mmol), trimethylacetaldehyde (**2a**, 43.0  $\mu$ L, 0.4 mmol). Purification by thin layer chromatography was performed (petroleum ether/ethyl acetate = 10/1) to yield **3d** (40.1 mg, 50%) as a white solid, mp: 106 – 108 °C.

<sup>1</sup>H NMR (400 MHz, CDCl<sub>3</sub>, ppm)  $\delta$  7.29 – 7.24 (m, 2H), 6.78 (d,  $J$  = 8.1 Hz, 1H), 3.21 (s, 3H), 2.16 (d,  $J$  = 14.4 Hz, 1H), 1.86 (d,  $J$  = 14.4 Hz, 1H), 1.32 (s, 9H), 0.60 (s, 9H); <sup>13</sup>C NMR (100 MHz, CDCl<sub>3</sub>, ppm)  $\delta$  181.2, 145.0, 140.4, 133.6, 123.7, 121.4, 107.2, 50.7, 47.5, 34.4, 31.7, 31.5, 30.7, 28.2, 26.2.

### 5-Isopropyl-1,3-dimethyl-3-neopentylindolin-2-one (3e)

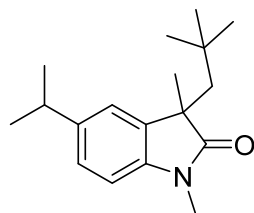

The reaction was conducted with *N*-(4-isopropylphenyl)-*N*-methylmethacrylamide (**1e**, 43.4 mg, 0.2 mmol), trimethylacetaldehyde (**2a**, 43.0  $\mu$ L, 0.4 mmol). Purification by thin layer chromatography was performed (petroleum ether/ethyl acetate = 10/1) to yield **3e** (30.0 mg, 55%) as a colorless liquid.

$^1\text{H}$  NMR (400 MHz,  $\text{CDCl}_3$ , ppm)  $\delta$  7.13 – 7.04 (m, 2H), 6.77 (d,  $J$  = 7.9 Hz, 1H), 3.20 (s, 3H), 2.89 (p,  $J$  = 6.9 Hz, 1H), 2.15 (d,  $J$  = 14.4 Hz, 1H), 1.85 (d,  $J$  = 14.4 Hz, 1H), 1.30 (s, 3H), 1.24 (dd,  $J$  = 6.9, 1.9 Hz, 6H), 0.60 (s, 9H);  $^{13}\text{C}$  NMR (100 MHz,  $\text{CDCl}_3$ , ppm)  $\delta$  181.2, 142.80, 140.8, 134.1, 125.2, 122.2, 107.6, 50.8, 47.5, 33.9, 31.7, 30.7, 28.2, 26.2, 24.5, 24.0. HRMS (ESI)  $m/z$  calcd for  $\text{C}_{18}\text{H}_{27}\text{NNaO}^+$  ( $\text{M}+\text{Na}$ ) $^+$  296.1985, found 296.1990.

### 5-Ethoxy-1,3-dimethyl-3-neopentylindolin-2-one (3f)

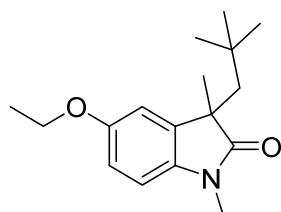

The reaction was conducted with *N*-(4-ethoxyphenyl)-*N*-methylmethacrylamide (**1f**, 43.8 mg, 0.2 mmol), trimethylacetaldehyde (**2a**, 43.0  $\mu$ L, 0.4 mmol). Purification by thin layer chromatography was performed (petroleum ether/ethyl acetate = 10/1) to yield **3f** (32.4 mg, 59%) as a white solid. mp: 93 – 95  $^{\circ}\text{C}$ .

$^1\text{H}$  NMR (400 MHz,  $\text{CDCl}_3$ , ppm)  $\delta$  6.83 (d,  $J$  = 2.3 Hz, 1H), 6.78 (d,  $J$  = 2.4 Hz, 1H), 6.75 (s, 1H), 4.07 – 3.95 (m, 2H), 3.20 (s, 3H), 2.15 (d,  $J$  = 14.4 Hz, 1H), 1.82 (d,  $J$  = 14.4 Hz, 1H), 1.41 (t,  $J$  = 7.0 Hz, 3H), 1.28 (s, 3H), 0.63 (s, 9H);  $^{13}\text{C}$  NMR (100 MHz,  $\text{CDCl}_3$ , ppm)  $\delta$  180.7, 154.9, 136.4, 135.6, 112.6, 112.1, 108.2, 64.1, 50.7, 47.8, 31.8, 30.8, 28.3, 26.3, 14.9. HRMS (ESI)  $m/z$  calcd for  $\text{C}_{17}\text{H}_{25}\text{NNaO}_2^+$  ( $\text{M}+\text{Na}$ ) $^+$  298.1778, found 298.1784.

### 1,3-Dimethyl-3-neopentyl-5-phenoxyindolin-2-one (**3g**)

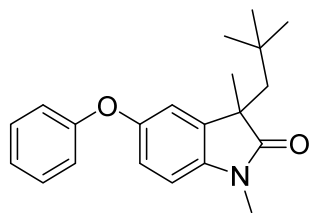

The reaction was conducted with *N*-methyl-*N*-(4-phenoxyphenyl)methacrylamide (**1g**, 53.4 mg, 0.2 mmol), trimethylacetaldehyde (**2a**, 43.0  $\mu$ L, 0.4 mmol). Purification by thin layer chromatography was performed (petroleum ether/ethyl acetate = 10/1) to yield **3g** (32.3 mg, 50%) as a white solid. mp: 95 – 97 °C.

$^1\text{H}$  NMR (400 MHz,  $\text{CDCl}_3$ , ppm)  $\delta$  7.31 (dd,  $J$  = 8.6, 7.4 Hz, 2H), 7.06 (t,  $J$  = 7.4 Hz, 1H), 6.99 – 6.91 (m, 4H), 6.82 (d,  $J$  = 8.3 Hz, 1H), 3.23 (s, 3H), 2.14 (d,  $J$  = 14.4 Hz, 1H), 1.79 (d,  $J$  = 14.4 Hz, 1H), 1.29 (s, 3H), 0.65 (s, 9H);  $^{13}\text{C}$  NMR (100 MHz,  $\text{CDCl}_3$ , ppm)  $\delta$  180.5, 158.2, 151.6, 138.6, 135.7, 129.3, 122.2, 118.7, 117.2, 116.3, 108., 50.4, 47.5, 31.5, 30.5, 27.9, 26.0. HRMS (ESI)  $m/z$  calcd for  $\text{C}_{21}\text{H}_{25}\text{NNaO}_2^+$  ( $\text{M}+\text{Na}$ ) $^+$  346.1778, found 346.1791.

### 5-Fluoro-1,3-dimethyl-3-neopentylindolin-2-one (**3h**)<sup>3</sup>

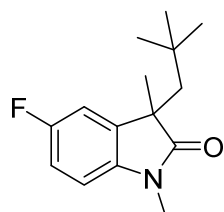

The reaction was conducted with *N*-(4-fluorophenyl)-*N*-methylmethacrylamide (**1h**, 38.6 mg, 0.2 mmol), trimethylacetaldehyde (**2a**, 43.0  $\mu$ L, 0.4 mmol). Purification by thin layer chromatography was performed (petroleum ether/ethyl acetate = 10/1) to yield **3h** (28.8 mg, 58%) as a white solid mp: 120 – 122 °C.

$^1\text{H}$  NMR (400 MHz,  $\text{CDCl}_3$ , ppm)  $\delta$  7.04 – 6.88 (m, 2H), 6.77 (dd,  $J$  = 8.2, 4.1 Hz, 1H), 3.22 (s, 3H), 2.16 (d,  $J$  = 14.4 Hz, 1H), 1.83 (d,  $J$  = 14.4 Hz, 1H), 1.29 (s, 3H), 0.63 (s, 9H);  $^{13}\text{C}$  NMR (100 MHz,  $\text{CDCl}_3$ , ppm)  $\delta$  180.6, 160.3, 157.9, 138.8, 138.7, 136.1, 136.1, 113.8, 113.6, 112.0, 111.7, 108.4, 108.3, 50.8, 47.9, 31.8, 30.8, 28.2, 26.4.

### 5-Chloro-1,3-dimethyl-3-neopentylindolin-2-one (**3i**)<sup>3</sup>

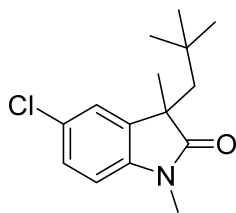

The reaction was conducted with *N*-(4-chlorophenyl)-*N*-methylethacrylamide (**1i**, 41.8 mg, 0.2 mmol), trimethylacetaldehyde (**2a**, 43.0  $\mu$ L, 0.4 mmol). Purification by thin layer chromatography was performed (petroleum ether/ethyl acetate = 10/1) to yield **3i** (25.9 mg, 49%) as a white solid, mp: 131 – 133 °C.

<sup>1</sup>H NMR (400 MHz, CDCl<sub>3</sub>, ppm)  $\delta$  7.24 (dd,  $J$  = 8.2, 2.1 Hz, 1H), 7.18 (d,  $J$  = 2.1 Hz, 1H), 6.78 (d,  $J$  = 8.2 Hz, 1H), 3.21 (s, 3H), 2.16 (d,  $J$  = 14.4 Hz, 1H), 1.83 (d,  $J$  = 14.5 Hz, 1H), 1.29 (s, 3H), 0.63 (s, 9H); <sup>13</sup>C NMR (100 MHz, CDCl<sub>3</sub>, ppm)  $\delta$  180.4, 141.4, 136.0, 127.5, 127.4, 124.2, 108.9, 50.7, 47.7, 31.8, 30.8, 28.2, 26.3.

### 7-Bromo-1,3-dimethyl-3-neopentylindolin-2-one (**3j**)

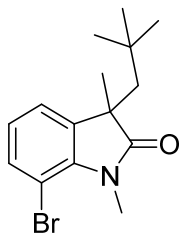

The reaction was conducted with *N*-(2-bromophenyl)-*N*-methylethacrylamide (**1j**, 50.8 mg, 0.2 mmol), trimethylacetaldehyde (**2a**, 65.0  $\mu$ L, 0.6mmol). Purification by thin layer chromatography was performed (petroleum ether/ethyl acetate = 10/1) to yield **3j** (27.9 mg, 45%) as a colorless liquid.

<sup>1</sup>H NMR (400 MHz, CDCl<sub>3</sub>, ppm)  $\delta$  7.37 (dd,  $J$  = 8.1, 1.1 Hz, 1H), 7.12 (dd,  $J$  = 7.3, 1.1 Hz, 1H), 6.91 – 6.85 (m, 1H), 3.61 (s, 3H), 2.16 (d,  $J$  = 14.4 Hz, 1H), 1.83 (d,  $J$  = 14.4 Hz, 1H), 1.29 (s, 3H), 0.62 (s, 9H); <sup>13</sup>C NMR (100 MHz, CDCl<sub>3</sub>, ppm)  $\delta$  181.3, 140.1, 137.3, 133.2, 123.1, 122.9, 102.4, 51.0, 47.13, 31.8, 30.8, 29.8, 28.6. HRMS (ESI)  $m/z$  calcd for C<sub>15</sub>H<sub>20</sub>BrNNaO<sup>+</sup> (M+Na)<sup>+</sup> 332.0620, found 332.0629.

### 5-Iodo-1,3-dimethyl-3-neopentylindolin-2-one (**3k**)<sup>3</sup>

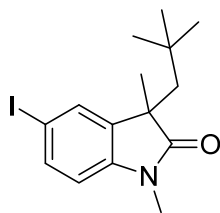

The reaction was conducted with *N*-(4-iodophenyl)-*N*-methylmethacrylamide (**1k**, 50.8 mg, 0.2 mmol), trimethylacetaldehyde (**2a**, 43.0  $\mu$ L, 0.4 mmol). Purification by thin layer chromatography was performed (petroleum ether/ethyl acetate = 10/1) to yield **3k** (35.7 mg, 50%) as a white solid, mp: 109 – 111 °C.

<sup>1</sup>H NMR (400 MHz, CDCl<sub>3</sub>, ppm)  $\delta$  7.58 (dd,  $J$  = 8.1, 1.7 Hz, 1H), 7.48 (d,  $J$  = 1.7 Hz, 1H), 6.64 (d,  $J$  = 8.2 Hz, 1H), 3.20 (s, 3H), 2.14 (d,  $J$  = 14.4 Hz, 1H), 1.82 (d,  $J$  = 14.4 Hz, 1H), 1.28 (s, 3H), 0.62 (s, 9H); <sup>13</sup>C NMR (100 MHz, CDCl<sub>3</sub>, ppm)  $\delta$  180.1, 142.5, 136.8, 136.3, 132.6, 110.1, 84.5, 50.7, 47.4, 31.8, 30.8, 28.1, 26.2.

### 5-Methoxy-1,3,7-trimethyl-3-neopentylindolin-2-one (**3l**)

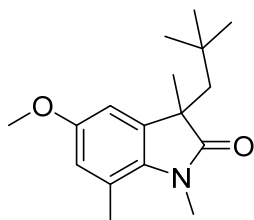

The reaction was conducted with *N*-(4-methoxy-2-methylphenyl)-*N*-methylmethacrylamide (**1l**, 43.8 mg, 0.2 mmol), trimethylacetaldehyde (**2a**, 43.0  $\mu$ L, 0.4 mmol). Purification by thin layer chromatography was performed (petroleum ether/ethyl acetate = 10/1) to yield **3l** (27.5 mg, 50%) as a white solid. mp: 113 – 115 °C.

<sup>1</sup>H NMR (400 MHz, CDCl<sub>3</sub>, ppm)  $\delta$  6.63 (d,  $J$  = 2.6 Hz, 1H), 6.53 (d,  $J$  = 2.6 Hz, 1H), 3.78 (s, 3H), 3.47 (s, 3H), 2.57 (s, 3H), 2.13 (d,  $J$  = 14.4 Hz, 1H), 1.79 (d,  $J$  = 14.4 Hz, 1H), 1.26 (s, 3H), 0.63 (s, 9H); <sup>13</sup>C NMR (100 MHz, CDCl<sub>3</sub>, ppm)  $\delta$  181.5, 155.0, 136.3, 134.1, 120.4, 115.7, 108.5, 55.6, 50.9, 47.2, 31.8, 30.8, 29.5, 28.8, 19.1. HRMS (ESI)  $m/z$  calcd for C<sub>17</sub>H<sub>25</sub>NNaO<sub>2</sub><sup>+</sup> (M+Na)<sup>+</sup> 298.1778, found 298.1789.

### 7-Chloro-5-methoxy-1,3-dimethyl-3-neopentylindolin-2-one (3m)

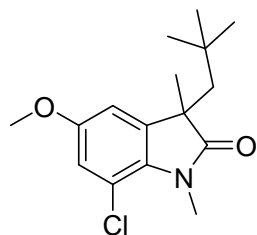

The reaction was conducted with *N*-(2-chloro-4-methoxyphenyl)-*N*-methylmethacrylamide (**1m**, 47.8 mg, 0.2 mmol), trimethylacetaldehyde (**2a**, 43.0  $\mu$ L, 0.4 mmol). Purification by thin layer chromatography was performed (petroleum ether/ethyl acetate = 10/1) to yield **3m** (31.5 mg, 53%) as a white solid. mp: 79 – 81  $^{\circ}$ C.

$^1\text{H}$  NMR (400 MHz,  $\text{CDCl}_3$ , ppm)  $\delta$  6.71 (s, 2H), 3.78 (s, 3H), 3.55 (s, 3H), 2.15 (d,  $J$  = 14.4 Hz, 1H), 1.80 (d,  $J$  = 14.4 Hz, 1H), 1.27 (s, 3H), 0.64 (s, 9H);  $^{13}\text{C}$  NMR (100 MHz,  $\text{CDCl}_3$ , ppm)  $\delta$  180.8, 155.3, 138.1, 132.3, 115.2, 113.5, 110.4, 55.8, 50.9, 47.6, 31.8, 30.8, 29.4, 28.6. HRMS (ESI)  $m/z$  calcd for  $\text{C}_{16}\text{H}_{22}\text{ClNNaO}_2^+$  ( $\text{M}+\text{Na}$ ) $^+$  318.1231, found 318.1239.

### 1,3,5,7-Tetramethyl-3-neopentylindolin-2-one (3n)

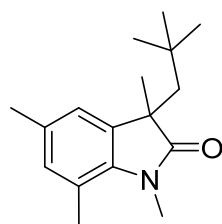

The reaction was conducted with *N*-(2,4-dimethylphenyl)-*N*-methylmethacrylamide (**1n**, 40.6 mg, 0.2 mmol), trimethylacetaldehyde (**2a**, 43.0  $\mu$ L, 0.4 mmol). Purification by thin layer chromatography was performed (petroleum ether/ethyl acetate = 10/1) to yield **3n** (23.8 mg, 46%) as a white solid. mp: 82 – 84  $^{\circ}$ C.

$^1\text{H}$  NMR (400 MHz,  $\text{CDCl}_3$ , ppm)  $\delta$  6.84 (s, 1H),  $\delta$  6.79 (s, 1H), 3.48 (s, 3H), 2.55 (s, 3H), 2.28 (s, 3H), 2.12 (d,  $J$  = 14.3 Hz, 1H), 1.80 (d,  $J$  = 14.3 Hz, 1H), 1.26 (s, 3H), 0.61 (s, 9H);  $^{13}\text{C}$  NMR (100 MHz,  $\text{CDCl}_3$ , ppm)  $\delta$  181.7, 138.2, 134.9, 131.6, 131.2, 122.5, 119.2, 50.9, 46.7, 31.8, 30.8, 29.5, 28.7, 20.8, 18.9. HRMS (ESI)  $m/z$  calcd for  $\text{C}_{17}\text{H}_{25}\text{NNaO}^+$  ( $\text{M}+\text{Na}$ ) $^+$  282.1828, found 282.1831.

### 5,7-Dibromo-1,3-dimethyl-3-neopentylindolin-2-one (**3o**)

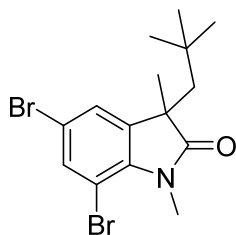

The reaction was conducted with *N*-(2,4-dibromophenyl)-*N*-methylmethacrylamide (**1o**, 66.6 mg, 0.2 mmol), trimethylacetaldehyde (**2a**, 43.0  $\mu$ L, 0.4 mmol). Purification by thin layer chromatography was performed (petroleum ether/ethyl acetate = 10/1) to yield **3o** (49.0 mg, 63%) as a white solid. mp: 123 – 125 °C.

$^1\text{H}$  NMR (400 MHz,  $\text{CDCl}_3$ , ppm)  $\delta$  7.32 (d,  $J$  = 1.6 Hz, 1H), 6.96 (d,  $J$  = 1.5 Hz, 1H), 3.20 (s, 3H), 2.42 (d,  $J$  = 14.4 Hz, 1H), 1.93 (d,  $J$  = 14.4 Hz, 1H), 1.43 (s, 3H), 0.67 (s, 9H);  $^{13}\text{C}$  NMR (100 MHz,  $\text{CDCl}_3$ , ppm)  $\delta$  180.2, 145.7, 131.2, 128.7, 121.6, 120.3, 110.6, 49.3, 47.7, 31.7, 30.1, 26.4, 24.1. HRMS (ESI)  $m/z$  calcd for  $\text{C}_{15}\text{H}_{19}\text{Br}_2\text{NNaO}^+$  ( $\text{M}+\text{Na}$ ) $^+$  409.9726, found 409.9722.

### 3-Benzyl-1-methyl-3-neopentylindolin-2-one (**3p**)<sup>4</sup>

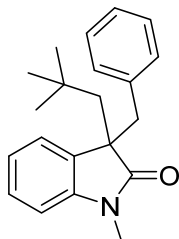

The reaction was conducted with 2-benzyl-*N*-methyl-*N*-phenylacrylamide (**1p**, 50.2 mg, 0.2 mmol), trimethylacetaldehyde (**2a**, 43.0  $\mu$ L, 0.4 mmol). Purification by thin layer chromatography was performed (petroleum ether/ethyl acetate = 10/1) to yield **3p** (31.3 mg, 51%) as a white solid, mp: 133 – 135 °C.

$^1\text{H}$  NMR (400 MHz,  $\text{CDCl}_3$ , ppm)  $\delta$  7.24 – 7.19 (m, 1H), 7.16 (td,  $J$  = 7.7, 1.2 Hz, 1H), 7.06 – 6.94 (m, 4H), 6.75 – 6.66 (m, 2H), 6.53 (d,  $J$  = 7.7 Hz, 1H), 3.05 (d,  $J$  = 12.6 Hz, 1H), 2.93 (s, 1H), 2.89 (s, 3H), 2.30 (d,  $J$  = 14.3 Hz, 1H), 2.01 (d,  $J$  = 14.3 Hz, 1H), 0.66 (s, 9H);  $^{13}\text{C}$  NMR (100 MHz,  $\text{CDCl}_3$ , ppm)  $\delta$  179.3, 143.4, 135.1, 131.0, 129.9, 127.6, 127.1, 126.3, 125.0, 121.4, 107.7, 53.6, 49.3, 47.5, 31.9, 31.1, 25.7.

### Methyl 2-(1-methyl-3-neopentyl-2-oxindolin-3-yl)acetate (**3q**)<sup>3</sup>

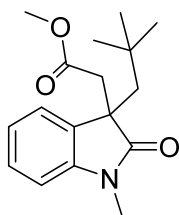

The reaction was conducted with methyl 3-(methyl(phenyl)carbamoyl)but-3-enoate (**1q**, 46.6 mg, 0.2 mmol), trimethylacetaldehyde (**2a**, 43.0  $\mu$ L, 0.4 mmol). Purification by thin layer chromatography was performed (petroleum ether/ethyl acetate = 10/1) to yield **3q** (26.5 mg, 46%) as a colorless liquid.

<sup>1</sup>H NMR (400 MHz, CDCl<sub>3</sub>, ppm)  $\delta$  7.30 – 7.26 (m, 1H), 7.23 – 7.17 (m, 1H), 7.01 (td,  $J$  = 7.6, 0.9 Hz, 1H), 6.85 (d,  $J$  = 7.8 Hz, 1H), 3.39 (s, 3H), 3.25 (s, 3H), 2.92 (d,  $J$  = 15.8 Hz, 1H), 2.77 (d,  $J$  = 15.8 Hz, 1H), 2.07 (d,  $J$  = 14.2 Hz, 1H), 1.89 (d,  $J$  = 14.1 Hz, 1H), 0.61 (s, 9H); <sup>13</sup>C NMR (100 MHz, CDCl<sub>3</sub>, ppm)  $\delta$  179.4, 169.8, 144.2, 130.8, 128.2, 123.9, 121.9, 108.0, 51.4, 50.3, 48.9, 44.6, 31.8, 30.7, 26.3.

### 3-Benzyl-5-bromo-1-methyl-3-neopentylindolin-2-one (**3r**)

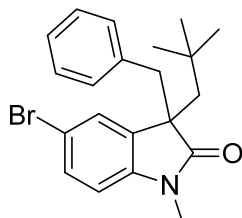

The reaction was conducted with 2-benzyl-*N*-(4-bromophenyl)-*N*-methylacrylamide (**1r**, 66.0 mg, 0.2 mmol), trimethylacetaldehyde (**2a**, 43.0  $\mu$ L, 0.4 mmol). Purification by thin layer chromatography was performed (petroleum ether/ethyl acetate = 10/1) to yield **3r** (50.1 mg, 65%) as a white solid, mp: 152 – 154 °C.

<sup>1</sup>H NMR (400 MHz, CDCl<sub>3</sub>, ppm)  $\delta$  7.33 (d,  $J$  = 1.9 Hz, 1H), 7.28 (dd,  $J$  = 8.2, 2.0 Hz, 1H), 7.06 – 6.98 (m, 3H), 6.73 (dd,  $J$  = 7.7, 1.5 Hz, 2H), 6.41 (d,  $J$  = 8.2 Hz, 1H), 3.06 (d,  $J$  = 12.6 Hz, 1H), 2.87 (s, 3H), 2.30 (d,  $J$  = 14.4 Hz, 1H), 1.97 (d,  $J$  = 14.4 Hz, 1H), 0.68 (s, 9H); <sup>13</sup>C NMR (100 MHz, CDCl<sub>3</sub>, ppm)  $\delta$  178.6, 142.4, 134.6, 133.5, 130.4, 129.9, 127.9, 127.3, 126.5, 114.2, 109.1, 53.8, 49.3, 47.5, 31.9, 31.1, 25.8. HRMS (ESI)  $m/z$  calcd for C<sub>21</sub>H<sub>24</sub>BrNNaO<sup>+</sup> (M+Na)<sup>+</sup> 408.0933, found 408.0939.

### 5-Bromo-1,3-dimethyl-3-neopentyl-1,3-dihydro-2H-benzo[g]indol-2-one (3s)

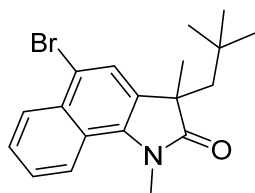

The reaction was conducted with *N*-(4-bromonaphthalen-1-yl)-*N*-methylmethacrylamide (**1s**, 60.8 mg, 0.2 mmol), trimethylacetaldehyde (**2a**, 43.0  $\mu$ L, 0.4 mmol). Purification by thin layer chromatography was performed (petroleum ether/ethyl acetate = 10/1) to yield **3s** (25.9 mg, 36%) as a colorless liquid.

$^1\text{H}$  NMR (400 MHz,  $\text{CDCl}_3$ , ppm)  $\delta$  8.10 (d,  $J$  = 9.3 Hz, 1H), 7.71 (d,  $J$  = 8.2 Hz, 1H), 7.62 (t,  $J$  = 14.4 Hz, 1H), 7.52 (d,  $J$  = 7.4 Hz, 1H), 6.80 (d,  $J$  = 8.3 Hz, 1H), 3.49 (s, 3H), 2.62 (d,  $J$  = 14.2 Hz, 1H), 1.96 (d,  $J$  = 14.2 Hz, 1H), 1.72 (s, 3H), 0.50 (s, 9H);  $^{13}\text{C}$  NMR (100 MHz,  $\text{CDCl}_3$ , ppm)  $\delta$  173.5, 138.9, 136.8, 131.4, 130.0, 127.7, 125.4, 125.2, 120.5, 115.8, 108.7, 57.7, 45.7, 35.4, 31.9, 30.8, 29.6. HRMS (ESI)  $m/z$  calcd for  $\text{C}_{19}\text{H}_{22}\text{BrNNaO}^+$  ( $\text{M}+\text{Na}$ ) $^+$  382.0777, found 382.0780.

### 1-Isopropyl-3-methyl-3-neopentylindolin-2-one (3t)

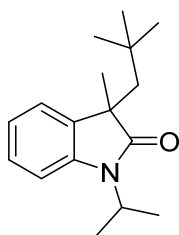

The reaction was conducted with *N*-isopropyl-*N*-phenylmethacrylamide (**1t**, 40.6 mg, 0.2 mmol), trimethylacetaldehyde (**2a**, 43.0  $\mu$ L, 0.4 mmol). Purification by thin layer chromatography was performed (petroleum ether/ethyl acetate = 10/1) to yield **3t** (23.8 mg, 46%) as a colorless liquid.

$^1\text{H}$  NMR (400 MHz,  $\text{CDCl}_3$ , ppm)  $\delta$  7.22 (t,  $J$  = 7.9 Hz, 2H), 7.04 – 6.98 (m, 2H), 4.70 (p,  $J$  = 7.0 Hz, 1H), 2.15 (d,  $J$  = 14.4 Hz, 1H), 1.84 (d,  $J$  = 14.4 Hz, 1H), 1.47 (d,  $J$  = 7.0 Hz, 6H), 1.26 (s, 3H), 0.64 (s, 9H);  $^{13}\text{C}$  NMR (100 MHz,  $\text{CDCl}_3$ , ppm)  $\delta$  180.5, 141.3, 134.6, 127.1, 124.2, 121.3, 109.9, 50.5, 47.1, 43.2, 31.8, 30.9, 28.8, 19.3, 18.8. HRMS (ESI)  $m/z$  calcd for  $\text{C}_{17}\text{H}_{25}\text{NNaO}^+$  ( $\text{M}+\text{Na}$ ) $^+$  282.1828, found 282.1838.

### 1-Cyclohexyl-3-methyl-3-neopentylindolin-2-one (3u)

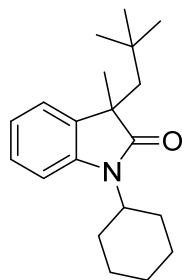

The reaction was conducted with *N*-cyclohexyl-*N*-phenylmethacrylamide (**1u**, 48.6 mg, 0.2 mmol), trimethylacetaldehyde (**2a**, 43.0  $\mu$ L, 0.4 mmol). Purification by thin layer chromatography was performed (petroleum ether/ethyl acetate = 10/1) to yield **3u** (27.5 mg, 46%) as a colorless liquid.

$^1\text{H}$  NMR (400 MHz,  $\text{CDCl}_3$ , ppm)  $\delta$  7.27 – 7.18 (m, 2H), 7.07 (d,  $J$  = 7.8 Hz, 1H), 6.99 (td,  $J$  = 7.5, 0.8 Hz, 1H), 4.23 (t,  $J$  = 11.9 Hz, 1H), 2.21 – 2.10 (m, 3H), 1.96 – 1.67 (m, 7H), 1.48 – 1.37 (2H), 1.26 (s, 3H), 0.63 (s, 9H);  $^{13}\text{C}$  NMR (100 MHz,  $\text{CDCl}_3$ , ppm)  $\delta$  180.7, 141.8, 134.6, 127.0, 124.1, 121.2, 110.1, 51.6, 50.5, 47.0, 31.8, 30.9, 29.0, 28.9, 28.6, 26.0, 25.9, 25.4. HRMS (ESI)  $m/z$  calcd for  $\text{C}_{20}\text{H}_{29}\text{NNaO}^+$  ( $\text{M}+\text{Na}$ ) $^+$  322.2141, found 322.2154.

### 1-Benzyl-3-methyl-3-neopentylindolin-2-one (3v)<sup>3</sup>

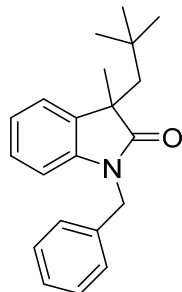

The reaction was conducted with *N*-benzyl-*N*-phenylmethacrylamide (**1v**, 50.2 mg, 0.2 mmol), trimethylacetaldehyde (**2a**, 43.0  $\mu$ L, 0.4 mmol). Purification by thin layer chromatography was performed (petroleum ether/ethyl acetate = 10/1) to yield **3v** (39.9 mg, 65%) as a colorless liquid.

$^1\text{H}$  NMR (400 MHz,  $\text{CDCl}_3$ , ppm)  $\delta$  7.33 – 7.18 (m, 6H), 7.13 (t,  $J$  = 7.7 Hz, 1H), 6.99 (t,  $J$  = 7.4 Hz, 1H), 6.77 (d,  $J$  = 7.8 Hz, 1H), 5.05 (d,  $J$  = 15.5 Hz, 1H), 4.78 (d,  $J$  = 15.5 Hz, 1H), 2.22 (d,  $J$  = 14.4 Hz, 1H), 1.90 (d,  $J$  = 14.3 Hz, 1H), 1.34 (s, 3H), 0.64 (s, 9H);  $^{13}\text{C}$  NMR (100 MHz,  $\text{CDCl}_3$ , ppm)  $\delta$  180.9, 141.9, 136.0, 134.1, 128.6, 127.5, 127.4, 127.3, 123.9, 121.9, 109.0, 50.4, 47.4, 43.8, 31.8, 30.9, 29.0.

### 2-(3-Methyl-3-neopentyl-2-oxoindolin-1-yl)ethyl

#### (2S)-2-(6-methoxynaphthalen-2-yl)propanoate (3aa)

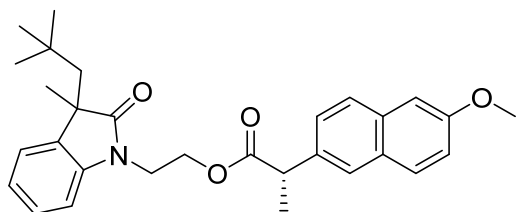

The reaction was conducted with 2-(*N*-phenylmethacrylamido)ethyl (S)-2-(6-methoxynaphthalen-2-yl)propanoate (**1aa**, 83.4 mg, 0.2 mmol), trimethylacetaldehyde (**2a**, 43.0  $\mu$ L, 0.4 mmol). Purification by thin layer chromatography was performed (petroleum ether/ethyl acetate = 5/1) to yield **3aa** (33.1 mg, 35%) as a colorless liquid.

$^1\text{H}$  NMR (400 MHz,  $\text{CDCl}_3$ , ppm)  $\delta$  7.64 (t,  $J$  = 7.6 Hz, 2H), 7.55 (d,  $J$  = 11.5 Hz, 1H), 7.31 – 7.25 (m, 1H), 7.16 – 7.04 (m, 4H), 6.98 (td,  $J$  = 7.4, 3.8 Hz, 1H), 6.78 (dd,  $J$  = 15.0, 7.8 Hz, 1H), 4.42 – 4.22 (m, 2H), 4.00 – 3.84 (m, 5H), 3.78 – 3.70 (m, 1H), 2.13 (dd,  $J$  = 14.4, 2.4 Hz, 1H), 1.83 (dd,  $J$  = 14.4, 4.8 Hz, 1H), 1.49 (t,  $J$  = 7.0 Hz, 3H), 1.21 (d,  $J$  = 17.4 Hz, 3H), 0.58 (d,  $J$  = 23.0 Hz, 9H);  $^{13}\text{C}$  NMR (100 MHz,  $\text{CDCl}_3$ , ppm)  $\delta$  181.1, 174.4, 157.56, 142.1, 135.1, 133.9, 133.6, 129.3, 128.8, 127.3, 127.1, 126.0, 125.9, 124.0, 121.9, 118.9, 108.4, 105.5, 61.9, 55.3, 50.5, 47.2, 45.3, 38.8, 31.8, 30.7, 28.5, 18.4. HRMS (ESI)  $m/z$  calcd for  $\text{C}_{30}\text{H}_{35}\text{NNaO}_4^+$  ( $\text{M}+\text{Na}$ ) $^+$  496.2458, found 496.2477.

#### 2-(3-Methyl-3-neopentyl-2-oxoindolin-1-yl)ethyl 2-(4-isobutylphenyl)propanoate (3ba)

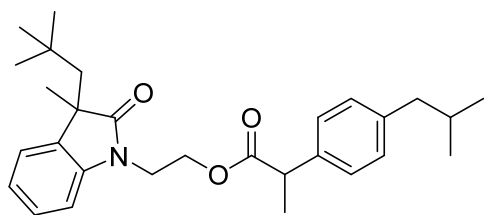

The reaction was conducted with 2-(*N*-phenylmethacrylamido)ethyl 2-(4-isobutylphenyl)propanoate (**1ba**, 78.6 mg, 0.2 mmol), trimethylacetaldehyde (**2a**, 43.0  $\mu$ L, 0.4 mmol). Purification by thin layer chromatography was performed (petroleum ether/ethyl acetate = 5/1) to yield **3ba** (40.4 mg, 45%) as a colorless liquid.

$^1\text{H}$  NMR (400 MHz,  $\text{CDCl}_3$ , ppm)  $\delta$  7.24 – 7.17 (m, 2H), 7.10 (dd,  $J$  = 8.2, 2.8 Hz, 2H), 7.06 – 6.99 (m, 3H), 6.86 (t,  $J$  = 14 Hz, 1H), 4.41 – 4.20 (m, 2H), 4.04 – 3.83 (m, 2H), 3.58 (qd,  $J$  = 7.1,

5.0 Hz, 1H), 2.42 (dd,  $J = 7.1, 3.7$  Hz, 2H), 2.15 (dd,  $J = 14.4, 1.5$  Hz, 1H), 1.89 – 1.79 (m, 2H), 1.41 (t,  $J = 7.3$  Hz, 3H), 1.25 (d,  $J = 8.0$  Hz, 3H), 0.89 (dd,  $J = 6.6, 2.3$  Hz, 6H), 0.61 (d,  $J = 10.8$  Hz, 9H);  $^{13}\text{C}$  NMR (100 MHz,  $\text{CDCl}_3$ , ppm)  $\delta$  181.1, 174.5, 142.2, 140.5, 137.3, 134.0, 129.3, 127.4, 127.1, 124.0, 121.9, 108.5, 61.7, 50.5, 47.3, 45.0, 44.9, 38.8, 31.8, 30.8, 30.1, 28.6, 22.4, 18.3. HRMS (ESI)  $m/z$  calcd for  $\text{C}_{29}\text{H}_{39}\text{NNaO}_3^+$  ( $\text{M}+\text{Na}$ ) $^+$  472.2822, found 472.2844.

### 2-(3-Methyl-3-neopentyl-2-oxoindolin-1-yl)ethyl

### 2-(4-(2,2-dichlorocyclopropyl)phenoxy)-2-methylpropanoate (3ca)

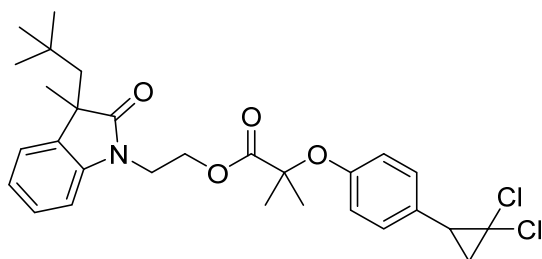

The reaction was conducted with 2-(*N*-phenylmethacrylamido)ethyl 2-(4-(2,2-dichlorocyclopropyl)phenoxy)-2-methylpropanoate (**1ca**, 95.2 mg, 0.2 mmol), trimethylacetaldehyde (**2a**, 43.0  $\mu\text{L}$ , 0.4 mmol). Purification by thin layer chromatography was performed (petroleum ether/ethyl acetate = 5/1) to yield **3ca** (63.8 mg, 60%) as a colorless liquid.

$^1\text{H}$  NMR (400 MHz,  $\text{CDCl}_3$ , ppm)  $\delta$  7.23 – 7.17 (m, 2H), 7.09 (d,  $J = 8.6$  Hz, 2H), 7.02 (t,  $J = 7.2$  Hz, 1H), 6.87 (d,  $J = 7.8$  Hz, 1H), 6.79 (d,  $J = 8.7$  Hz, 2H), 4.44 – 4.34 (m, 2H), 4.01 – 3.88 (m, 2H), 2.82 (dd,  $J = 10.6, 8.5$  Hz, 1H), 2.15 (d,  $J = 14.4$  Hz, 1H), 1.96 – 1.84 (m, 2H), 1.76 (t,  $J = 7.9$  Hz, 1H), 1.49 (s, 6H), 1.26 (s, 3H), 0.61 (s, 9H);  $^{13}\text{C}$  NMR (100 MHz,  $\text{CDCl}_3$ , ppm)  $\delta$  181.0, 173.8, 154.7, 141.8, 133.8, 129.6, 128.2, 127.4, 124.0, 122.0, 118.8, 108.5, 62.4, 60.7, 50.4, 47.2, 38.6, 34.7, 31.8, 30.8, 28.6, 25.7, 25.4, 25.0. HRMS (ESI)  $m/z$  calcd for  $\text{C}_{29}\text{H}_{35}\text{Cl}_2\text{NNaO}_4^+$  ( $\text{M}+\text{Na}$ ) $^+$  554.1835, found 554.1866.

### 2-(3-Methyl-3-neopentyl-2-oxoindolin-1-yl)ethyl 4-(*N,N*-dipropylsulfamoyl)benzoate (3da)

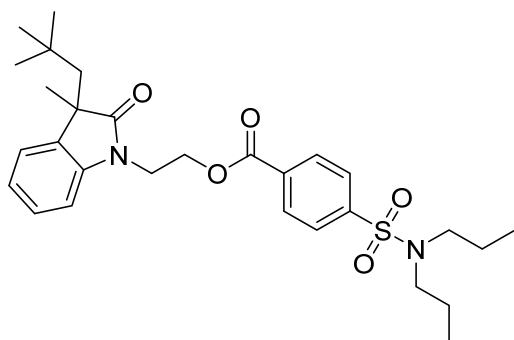

The reaction was conducted with 2-(*N*-phenylmethacrylamido)ethyl 4-(*N,N*-dipropylsulfamoyl)benzoate (**1da**, 94.4 mg, 0.2 mmol), trimethylacetaldehyde (**2a**, 43.0  $\mu$ L, 0.4 mmol). Purification by thin layer chromatography was performed (petroleum ether/ethyl acetate = 5/1) to yield **3da** (55.9 mg, 53%) as a colorless liquid.

$^1\text{H}$  NMR (400 MHz,  $\text{CDCl}_3$ , ppm)  $\delta$  8.03 (d,  $J$  = 8.3 Hz, 2H), 7.81 (d,  $J$  = 8.4 Hz, 2H), 7.26 – 7.18 (m, 2H), 7.05 (t,  $J$  = 7.5 Hz, 1H), 6.96 (d,  $J$  = 8.1 Hz, 1H), 4.68 – 4.54 (m, 2H), 4.16 (t,  $J$  = 5.4 Hz, 2H), 3.09 (t,  $J$  = 15.2 Hz, 4H), 2.17 (d,  $J$  = 14.5 Hz, 1H), 1.89 (d,  $J$  = 14.5 Hz, 1H), 1.57 – 1.48 (m, 4H), 1.26 (d,  $J$  = 19.2 Hz, 6H), 0.86 (t,  $J$  = 7.4 Hz, 6H), 0.60 (s, 9H);  $^{13}\text{C}$  NMR (100 MHz,  $\text{CDCl}_3$ , ppm)  $\delta$  181.2, 165.0, 144.3, 141.8, 134.1, 132.8, 130.3, 127.4, 126.8, 124.2, 122.2, 108.2, 62.4, 50.4, 49.7, 47.3, 38.7, 31.8, 30.8, 28.7, 27.0, 21.8, 11.1. HRMS (ESI)  $m/z$  calcd for  $\text{C}_{29}\text{H}_{40}\text{N}_2\text{NaO}_5\text{S}^+$  ( $\text{M}+\text{Na}$ ) $^+$  551.2550, found 552.2569.

### 3-(Cyclohexylmethyl)-1,3-dimethylindolin-2-one (**4b**)<sup>3</sup>

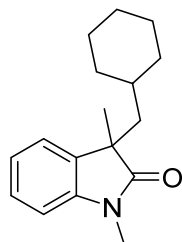

The reaction was conducted with *N*-methyl-*N*-phenylmethacrylamide (**1a**, 35.0 mg, 0.2 mmol), cyclohexanecarbaldehyde (**2b**, 49.0  $\mu$ L, 0.4 mmol). Purification by thin layer chromatography was performed (petroleum ether/ethyl acetate = 10/1) to yield **4b** (27.2 mg, 53%) as a colorless liquid.

$^1\text{H}$  NMR (400 MHz,  $\text{CDCl}_3$ , ppm)  $\delta$  7.29 – 7.23 (m, 1H), 7.16 (d,  $J$  = 7.2 Hz, 1H), 7.06 (t,  $J$  = 7.5 Hz, 1H), 6.85 (d,  $J$  = 7.7 Hz, 1H), 3.22 (s, 3H), 1.93 (dd,  $J$  = 14.0, 6.9 Hz, 1H), 1.73 (dd,  $J$  = 14.0, 5.2 Hz, 1H), 1.53 – 1.44 (m, 3H), 1.31 (s, 3H), 1.26 – 1.20 (m, 2H), 1.00 – 0.72 (m, 6H);  $^{13}\text{C}$  NMR (100 MHz,  $\text{CDCl}_3$ , ppm)  $\delta$  181.1, 143.0, 134.3, 127.4, 122.6, 122.3, 107.9, 47.8, 45.3, 34.7, 34.4, 33.4, 26.1, 26.0, 25.9.

### 3-(Cyclopentylmethyl)-1,3-dimethylindolin-2-one (**4c**)<sup>4</sup>

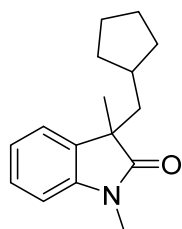

The reaction was conducted with *N*-methyl-*N*-phenylmethacrylamide (**1a**, 35.0 mg, 0.2 mmol), cyclopentanecarbaldehyde (**2c**, 43.0  $\mu$ L, 0.4 mmol). Purification by thin layer chromatography was performed (petroleum ether/ethyl acetate = 10/1) to yield **4c** (24.3 mg, 50%) as a colorless liquid.

$^1\text{H}$  NMR (400 MHz,  $\text{CDCl}_3$ , ppm)  $\delta$  7.29 – 7.24 (m, 1H), 7.17 (d,  $J$  = 7.1 Hz, 1H), 7.06 (t,  $J$  = 7.5 Hz, 1H), 6.85 (d,  $J$  = 7.7 Hz, 1H), 3.22 (s, 3H), 2.07 (dd,  $J$  = 13.7, 7.2 Hz, 1H), 1.90 (dd,  $J$  = 13.7, 5.9 Hz, 1H), 1.47 – 1.22 (m, 10H), 1.05 – 0.95 (m, 1H), 0.87 – 0.77 (m, 1H);  $^{13}\text{C}$  NMR (100 MHz,  $\text{CDCl}_3$ , ppm)  $\delta$  181.1, 143.2, 134.3, 127.5, 122.8, 122.2, 107.8, 48.4, 44.4, 37.2, 33.7, 32.6, 26.2, 25.2, 24.8, 24.8.

### 3-Isobutyl-1,3-dimethylindolin-2-one (**4d**)<sup>3</sup>

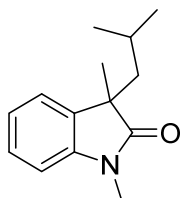

The reaction was conducted with *N*-methyl-*N*-phenylmethacrylamide (**1a**, 35.0 mg, 0.2 mmol), isobutyraldehyde (**2d**, 37.0  $\mu$ L, 0.4 mmol). Purification by thin layer chromatography was performed (petroleum ether/ethyl acetate = 10/1) to yield **4d** (20.3 mg, 47%) as a colorless liquid.

$^1\text{H}$  NMR (400 MHz,  $\text{CDCl}_3$ , ppm)  $\delta$  7.30 – 7.24 (m, 1H), 7.17 (d,  $J$  = 7.3 Hz, 1H), 7.06 (td,  $J$  = 7.5, 0.8 Hz, 1H), 6.85 (d,  $J$  = 7.8 Hz, 1H), 3.22 (s, 3H), 1.94 (dd,  $J$  = 13.9, 7.7 Hz, 1H), 1.76 (dd,  $J$  = 13.9, 5.4 Hz, 1H), 1.33 – 1.24 (m, 4H), 0.63 (dd,  $J$  = 17.7, 6.7 Hz, 6H);  $^{13}\text{C}$  NMR (100 MHz,  $\text{CDCl}_3$ , ppm)  $\delta$  181.1, 143.2, 134.2, 127.6, 122.8, 122.3, 107.9, 48.1, 46.7, 26.2, 26.1, 25.5, 24.1, 22.8.

### 1,3-Dimethyl-3-(2-methylbutyl)indolin-2-one (**4e**)<sup>3</sup>

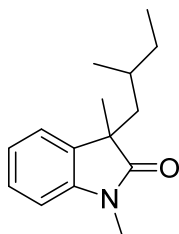

The reaction was conducted with *N*-methyl-*N*-phenylmethacrylamide (**1a**, 35.0 mg, 0.2 mmol), 2-methylbutanal (**2e**, 43.0  $\mu$ L, 0.4 mmol). Purification by thin layer chromatography was

performed (petroleum ether/ethyl acetate = 10/1) to yield **4e** (25.4 mg, 47%) as a colorless liquid. (dr = 1:1).

$^1\text{H}$  NMR (400 MHz,  $\text{CDCl}_3$ , ppm)  $\delta$  7.29 – 7.24 (m, 1H), 7.22 – 7.13 (m, 1H), 7.11 – 7.03 (m, 1H), 6.85 (dd,  $J$  = 7.7, 3.9 Hz, 1H), 3.22 (s, 3H), 2.03 (dd,  $J$  = 14.0, 5.2 Hz, 0.5H), 1.87 (d,  $J$  = 6.6 Hz, 1H), 1.66 (dd,  $J$  = 13.9, 6.5 Hz, 0.5H), 1.33 (s, 3H), 1.20 – 0.93 (m, 3H), 0.86 – 0.62 (m, 3H), 0.59 (d,  $J$  = 6.4 Hz, 1H), 0.49 (d,  $J$  = 6.5 Hz, 1H);  $^{13}\text{C}$  NMR (100 MHz,  $\text{CDCl}_3$ , ppm)  $\delta$  181.3, 180.8, 143.2, 143.1, 134.5, 134.0, 127.6, 127.5, 122.8, 122.8, 122.3, 122.2, 107.9, 107.9, 48.1, 47.9, 45.0, 44.4, 31.6, 31.5, 30.7, 30.0, 26.2, 26.11, 25.7, 20.3, 19.2, 11.0, 10.9, 8.8.

**3-(2-Ethylhexyl)-1,3-dimethylindolin-2-one (4f)<sup>3</sup>**

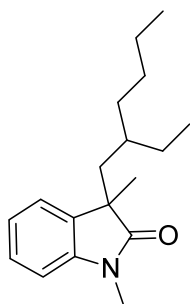

The reaction was conducted with *N*-methyl-*N*-phenylmethacrylamide (**1a**, 35.0 mg, 0.2 mmol), 2-ethylhexanal (**2f**, 63.0  $\mu\text{L}$ , 0.4 mmol). Purification by thin layer chromatography was performed (petroleum ether/ethyl acetate = 10/1) to yield **4f** (25.4 mg, 48%) as a colorless liquid. (dr = 1:1).

$^1\text{H}$  NMR (400 MHz,  $\text{CDCl}_3$ , ppm)  $\delta$  7.29 – 7.22 (m, 1H), 7.18 – 7.14 (m, 1H), 7.05 (t,  $J$  = 7.5 Hz, 1H), 6.84 (d,  $J$  = 7.6 Hz, 1H), 3.21 (d,  $J$  = 2.0 Hz, 3H), 1.96 – 1.88 (m, 1H), 1.76 (td,  $J$  = 13.8, 4.6 Hz, 1H), 1.34 (s, 3H), 1.13 – 0.89 (m, 9H), 0.81 – 0.74 (m, 3H), 0.71 – 0.62 (m, 3H);  $^{13}\text{C}$  NMR (100 MHz,  $\text{CDCl}_3$ , ppm)  $\delta$  181.0, 181.0, 143., 134.3, 134.2, 127.5, 122.8, 122.8, 122.2, 122.2, 107.8, 48.0, 48.0, 41.9, 35.7, 35.6, 33.3, 32.7, 28.2, 28.2, 26.4, 26.1, 26.1, 25.6, 25.5, 22.8, 22.7, 14.0, 10.3, 10.2.

**3-(3-(4-Isopropylphenyl)-2-methylpropyl)-1,3-dimethylindolin-2-one (4g)**

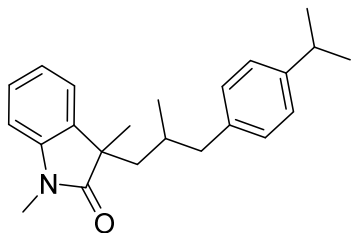

The reaction was conducted with *N*-methyl-*N*-phenylmethacrylamide (**1a**, 35.0 mg, 0.2 mmol), 3-(4-isopropylphenyl)-2-methylpropanal (**2g**, 80.0  $\mu$ L, 0.4 mmol). Purification by thin layer chromatography was performed (petroleum ether/ethyl acetate = 10/1) to yield **4g** (36.8 mg, 52%) as a colorless liquid. (dr = 1:1).

$^1\text{H}$  NMR (400 MHz, Chloroform-*d*)  $\delta$  7.33 – 6.77 (m, 8H), 3.21 (t,  $J$  = 5.8 Hz, 3H), 2.91 – 2.78 (m, 1H), 2.57 – 2.41 (m, 0.5 H), 2.31 – 1.99 (m, 2H), 1.95 – 1.88 (m, 1H), 1.84 – 1.55 (m, 1H), 1.39 – 1.18 (m, 10H), 0.94 (t,  $J$  = 7.3 Hz, 05 H), 0.63 (d,  $J$  = 6.6 Hz, 1H), 0.47 (d,  $J$  = 6.6 Hz, 1H);  $^{13}\text{C}$  NMR (100 MHz,  $\text{CDCl}_3$ , ppm)  $\delta$  181.1, 180.9, 146.1, 146.0, 143.1, 138.3, 138.1, 134.2, 133.7, 129.0, 128.9, 127.6, 127.5, 126.0, 126.0, 122.9, 122.8, 122.4, 108.0, 107.9, 48.0, 47.9, 45.2, 44.3, 44.0, 42.8, 33.6, 33.5, 32.6, 32.2, 26.2, 26.2, 26.0, 26.0, 24.1, 24.0, 24.0, 20.3, 19.8. HRMS (ESI)  $m/z$  calcd for  $\text{C}_{23}\text{H}_{29}\text{NNaO}^+$  ( $\text{M}+\text{Na}$ ) $^+$  358.2141, found 358.2157.

**3-(3-(4-(*tert*-Butyl)phenyl)-2-methylpropyl)-1,3-dimethylindolin-2-one (4h)**

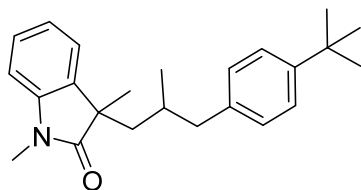

The reaction was conducted with *N*-methyl-*N*-phenylmethacrylamide (**1a**, 35.0 mg, 0.2 mmol), 3-(4-(*tert*-butyl)phenyl)-2-methylpropanal (**2h**, 86.0  $\mu$ L, 0.4 mmol). Purification by thin layer chromatography was performed (petroleum ether/ethyl acetate = 10/1) to yield **4h** (35.6 mg, 52%) as a colorless liquid. (dr = 1:1).

$^1\text{H}$  NMR (400 MHz,  $\text{CDCl}_3$ , ppm)  $\delta$  7.26 – 6.75 (m, 8H), 3.22 (d,  $J$  = 6.1 Hz, 3H), 2.46 – 1.68 (m, 5H), 1.36 (s, 1H), 1.28 (d,  $J$  = 15.5 Hz, 12H), 0.63 (d,  $J$  = 6.6 Hz, 1H), 0.48 (d,  $J$  = 6.6 Hz, 1H);  $^{13}\text{C}$  NMR (100 MHz,  $\text{CDCl}_3$ , ppm)  $\delta$  181.2, 181.0, 148.4, 148.3, 143.2, 137.9, 137.7, 134.2, 133.7, 128.7, 128.7, 127.7, 127.6, 124.9, 124.8, 122.9, 122.8, 122.4, 108.0, 107.9, 48.0, 47.9, 45.2, 44.2, 44.1, 42.7, 34.3, 34., 32.6, 31.4, 31.3, 26.2, 26.2, 26.1, 26.0, 20.3, 19.8. HRMS (ESI)  $m/z$  calcd for  $\text{C}_{24}\text{H}_{31}\text{NNaO}^+$  ( $\text{M}+\text{Na}$ ) $^+$  372.2298, found 372.2313.

**1,3-Dimethyl-3-(2-oxo-2-phenylethyl)indolin-2-one (6a)<sup>5</sup>**

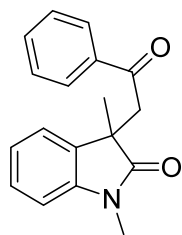

The reaction was conducted with *N*-methyl-*N*-phenylmethacrylamide (**1a**, 35.0 mg, 0.2 mmol), benzaldehyde (**5a**, 41.0  $\mu$ L, 0.4 mmol). Purification by thin layer chromatography was performed (petroleum ether/ethyl acetate = 5/1) to yield **6a** (34.5 mg, 62%) as a colorless liquid.

<sup>1</sup>H NMR (400 MHz, CDCl<sub>3</sub>, ppm)  $\delta$  7.84 (d, *J* = 7.4 Hz, 2H), 7.52 (t, *J* = 7.4 Hz, 1H), 7.39 (t, *J* = 7.7 Hz, 2H), 7.28 – 7.24 (m, 1H), 7.14 (d, *J* = 7.3 Hz, 1H), 6.98 (t, *J* = 7.5 Hz, 1H), 6.90 (d, *J* = 7.8 Hz, 1H), 3.76 – 3.62 (m, 2H), 3.32 (s, 3H), 1.44 (s, 3H); <sup>13</sup>C NMR (100 MHz, CDCl<sub>3</sub>, ppm)  $\delta$  196.1, 180.6, 143.8, 136.2, 133.7, 133.2, 128.5, 127.9, 127.8, 122.1, 121.7, 108.1, 46.0, 45.2, 26.4, 24.9.

**5-(*tert*-Butyl)-1,3-dimethyl-3-(2-oxo-2-phenylethyl)indolin-2-one (6b)**

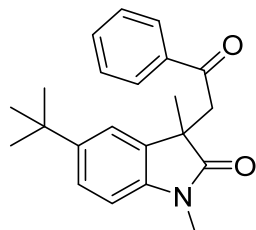

The reaction was conducted with *N*-(4-(*tert*-butyl)phenyl)-*N*-methylmethacrylamide (**1d**, 46.2 mg, 0.2 mmol), benzaldehyde (**5a**, 41.0  $\mu$ L, 0.4 mmol). Purification by thin layer chromatography was performed (petroleum ether/ethyl acetate = 5/1) to yield **6b** (33.5 mg, 50%) as a colorless liquid.

<sup>1</sup>H NMR (400 MHz, CDCl<sub>3</sub>, ppm)  $\delta$  7.83 (d, *J* = 7.3 Hz, 2H), 7.51 (t, *J* = 7.4 Hz, 1H), 7.39 (t, *J* = 7.7 Hz, 2H), 7.27 (dd, *J* = 7.9, 2.1 Hz, 1H), 7.16 (d, *J* = 1.7 Hz, 1H), 6.82 (d, *J* = 8.2 Hz, 1H), 3.66 (q, *J* = 17.6 Hz, 2H), 3.29 (s, 3H), 1.45 (s, 3H), 1.24 (s, 9H); <sup>13</sup>C NMR (100 MHz, CDCl<sub>3</sub>, ppm)  $\delta$  196.4, 180.6, 145.3, 141.3, 136.6, 133.2, 133.0, 128.4, 128.6, 124.4, 119.1, 107.5, 45.9, 45.7, 34.5, 31.5, 26.4, 24.8. HRMS (ESI) *m/z* calcd for C<sub>22</sub>H<sub>25</sub>NNaO<sub>2</sub><sup>+</sup> (*M*+Na)<sup>+</sup> 358.1778, found 358.1809.

### 1,3,5-Trimethyl-3-(2-oxo-2-phenylethyl)indolin-2-one (**6c**)<sup>5</sup>

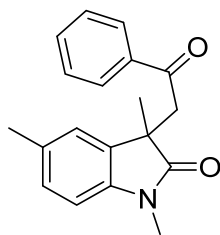

The reaction was conducted with *N*-methyl-*N*-(*p*-tolyl)methacrylamide (**1c**, 37.8 mg, 0.2 mmol), benzaldehyde (**5a**, 41.0  $\mu$ L, 0.4 mmol). Purification by thin layer chromatography was performed (petroleum ether/ethyl acetate = 5/1) to yield **6c** (31.0 mg, 53%) as a white solid, mp: 128 – 131  $^{\circ}$ C.

$^1\text{H}$  NMR (400 MHz,  $\text{CDCl}_3$ , ppm)  $\delta$  7.85 (d,  $J$  = 7.5 Hz, 2H), 7.51 (t,  $J$  = 7.4 Hz, 1H), 7.40 (t,  $J$  = 7.7 Hz, 2H), 7.05 (d,  $J$  = 7.8 Hz, 1H), 6.94 (s, 1H), 6.79 (d,  $J$  = 7.9 Hz, 1H), 3.73 – 3.62 (m, 2H), 3.29 (s, 3H), 2.27 (s, 3H), 1.42 (s, 3H);  $^{13}\text{C}$  NMR (100 MHz,  $\text{CDCl}_3$ , ppm)  $\delta$  196.1, 180.5, 141.4, 136.3, 133.7, 133.1, 131.5, 128.4, 128.0, 127.9, 122.6, 107.8, 46.0, 45.3, 26.4, 25.0, 21.1.

### 5-Isopropyl-1,3-dimethyl-3-(2-oxo-2-phenylethyl)indolin-2-one (**6d**)

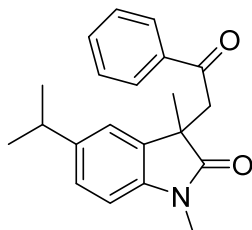

The reaction was conducted with *N*-(4-isopropylphenyl)-*N*-methylmethacrylamide (**1e**, 43.4 mg, 0.2 mmol), benzaldehyde (**5a**, 41.0  $\mu$ L, 0.4 mmol). Purification by thin layer chromatography was performed (petroleum ether/ethyl acetate = 5/1) to yield **6d** (35.3 mg, 53%) as a colorless liquid.

$^1\text{H}$  NMR (400 MHz,  $\text{CDCl}_3$ , ppm)  $\delta$  7.88 – 7.78 (m, 2H), 7.52 (t,  $J$  = 7.4 Hz, 1H), 7.40 (t,  $J$  = 7.7 Hz, 2H), 7.11 (dd,  $J$  = 8.0, 1.7 Hz, 1H), 6.99 (d,  $J$  = 1.5 Hz, 1H), 6.81 (d,  $J$  = 8.0 Hz, 1H), 3.73 – 3.59 (m, 2H), 3.29 (s, 3H), 2.82 (p,  $J$  = 6.9 Hz, 1H), 1.44 (s, 3H), 1.17 (dd,  $J$  = 6.9, 4.7 Hz, 6H);  $^{13}\text{C}$  NMR (100 MHz,  $\text{CDCl}_3$ , ppm)  $\delta$  196.3, 180.6, 143.0, 141.6, 136.5, 133.6, 133.1, 128.5, 128.0, 125.4, 120.3, 107.8, 45.9, 45.5, 33.8, 26.5, 24.9, 24.3, 24.2. HRMS (ESI)  $m/z$  calcd for  $\text{C}_{21}\text{H}_{23}\text{NNaO}_2^+$  ( $\text{M}+\text{Na}$ ) $^+$  344.1621, found 344.1639.

**5-Chloro-1,3-dimethyl-3-(2-oxo-2-phenylethyl)indolin-2-one (6e)<sup>5</sup>**

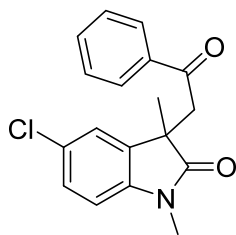

The reaction was conducted with *N*-(4-chlorophenyl)-*N*-methylethacrylamide (**1i**, 41.8 mg, 0.2 mmol), benzaldehyde (**5a**, 41.0  $\mu$ L, 0.4 mmol). Purification by thin layer chromatography was performed (petroleum ether/ethyl acetate = 5/1) to yield **6e** (25.0 mg, 40%) as a colorless liquid.

<sup>1</sup>H NMR (400 MHz, CDCl<sub>3</sub>, ppm)  $\delta$  7.88 – 7.82 (m, 2H), 7.56 – 7.51 (m, 1H), 7.41 (t,  $J$  = 7.7 Hz, 2H), 7.23 (dd,  $J$  = 8.3, 2.1 Hz, 1H), 7.10 (d,  $J$  = 2.0 Hz, 1H), 6.83 (d,  $J$  = 8.3 Hz, 1H), 3.70 (s, 2H), 3.31 (s, 3H), 1.43 (s, 3H); <sup>13</sup>C NMR (100 MHz, CDCl<sub>3</sub>, ppm)  $\delta$  195.8, 180.1, 142.5, 136.0, 135.5, 133.4, 128.5, 127.9, 127.7, 127.4, 122.2, 109.0, 46.0, 45.4, 26.6, 24.8.

**7-Bromo-1,3-dimethyl-3-(2-oxo-2-phenylethyl)indolin-2-one (6f)<sup>6</sup>**

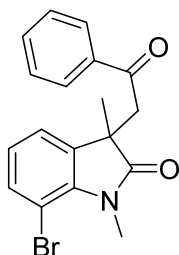

The reaction was conducted with *N*-(2-bromophenyl)-*N*-methylethacrylamide (**1j**, 50.8 mg, 0.2 mmol), benzaldehyde (**5a**, 41.0  $\mu$ L, 0.4 mmol). Purification by thin layer chromatography was performed (petroleum ether/ethyl acetate = 5/1) to yield **6f** (25.0 mg, 35%) as a colorless liquid.

<sup>1</sup>H NMR (400 MHz, CDCl<sub>3</sub>, ppm)  $\delta$  7.86 – 7.82 (m, 2H), 7.56 – 7.51 (m, 1H), 7.41 (t,  $J$  = 7.7 Hz, 2H), 7.23 (dd,  $J$  = 8.3, 2.1 Hz, 1H), 7.10 (d,  $J$  = 2.0 Hz, 1H), 6.83 (d,  $J$  = 8.3 Hz, 1H), 3.70 (s, 2H), 3.31 (s, 3H), 1.43 (s, 3H); <sup>13</sup>C NMR (100 MHz, CDCl<sub>3</sub>, ppm)  $\delta$  195.8, 180.1, 142.5, 136.0, 135.5, 133.4, 128.5, 127.9, 127.7, 127.4, 122.2, 109.0, 46.0, 45.4, 26.6, 24.8.

**5-Iodo-1,3-dimethyl-3-(2-oxo-2-phenylethyl)indolin-2-one (6g)**

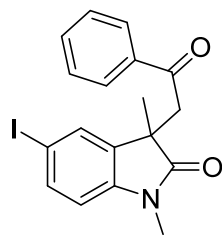

The reaction was conducted with *N*-(4-iodophenyl)-*N*-methylmethacrylamide (**1k**, 60.2 mg, 0.2 mmol), benzaldehyde (**5a**, 41.0  $\mu$ L, 0.4 mmol). Purification by thin layer chromatography was performed (petroleum ether/ethyl acetate = 5/1) to yield **6g** (34.0 mg, 42%) as a white solid. mp: 151 – 154  $^{\circ}$ C.

$^1\text{H}$  NMR (400 MHz,  $\text{CDCl}_3$ , ppm)  $\delta$  7.84 (d,  $J$  = 7.3 Hz, 2H), 7.58 – 7.51 (m, 2H), 7.44 – 7.38 (m, 3H), 6.70 (d,  $J$  = 8.2 Hz, 1H), 3.69 (s, 2H), 3.29 (s, 3H), 1.41 (s, 3H);  $^{13}\text{C}$  NMR (100 MHz,  $\text{CDCl}_3$ , ppm)  $\delta$  195.7, 179.8, 143.6, 136.6, 136.3, 135.9, 133.4, 130.4, 128.5, 127.9, 110.2, 84.6, 46.0, 45.1, 26.5, 24.9. HRMS (ESI)  $m/z$  calcd for  $\text{C}_{18}\text{H}_{16}\text{INNaO}_2^+$  ( $\text{M}+\text{Na}$ ) $^+$  428.0118, found 428.0142.

**1,3,5,7-Tetramethyl-3-(2-oxo-2-phenylethyl)indolin-2-one (6h)**

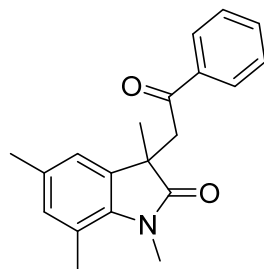

The reaction was conducted with *N*-(2,4-dimethylphenyl)-*N*-methylmethacrylamide (**1n**, 40.6 mg, 0.2 mmol), benzaldehyde (**5a**, 41.0  $\mu$ L, 0.4 mmol). Purification by thin layer chromatography was performed (petroleum ether/ethyl acetate = 5/1) to yield **6h** (36.8 mg, 60%) as a white solid. mp: 181 – 183  $^{\circ}$ C.

$^1\text{H}$  NMR (400 MHz,  $\text{CDCl}_3$ , ppm)  $\delta$  7.87 – 7.82 (m, 2H), 7.51 (t,  $J$  = 7.4 Hz, 1H), 7.39 (t,  $J$  = 7.7 Hz, 2H), 6.76 (d,  $J$  = 9.4 Hz, 2H), 3.66 (s, 2H), 3.56 (s, 3H), 2.57 (s, 3H), 2.20 (s, 3H), 1.39 (s, 3H);  $^{13}\text{C}$  NMR (100 MHz,  $\text{CDCl}_3$ , ppm)  $\delta$  196.1, 181.3, 139.1, 136.3, 134.4, 133.0, 132.0, 131.3, 128.4, 127.9, 120.2, 119.3, 46.2, 44.6, 29.7, 25.5, 20.7, 18.9. HRMS (ESI)  $m/z$  calcd for  $\text{C}_{20}\text{H}_{21}\text{NNaO}_2^+$  ( $\text{M}+\text{Na}$ ) $^+$  330.1465, found 330.1483.

**5-Methoxy-1,3,7-trimethyl-3-(2-oxo-2-phenylethyl)indolin-2-one (6i)**

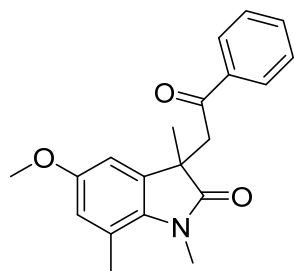

The reaction was conducted with *N*-(4-methoxy-2-methylphenyl)-*N*-methylmethacrylamide (**1l**, 43.8 mg, 0.2 mmol), benzaldehyde (**5a**, 41.0  $\mu$ L, 0.4 mmol). Purification by thin layer chromatography was performed (petroleum ether/ethyl acetate = 5/1) to yield **6i** (29.0 mg, 45%) as a white solid. mp: 131 – 134  $^{\circ}$ C.

$^1\text{H}$  NMR (400 MHz,  $\text{CDCl}_3$ , ppm)  $\delta$  7.85 (d,  $J$  = 7.4 Hz, 2H), 7.52 (t,  $J$  = 7.4 Hz, 1H), 7.40 (t,  $J$  = 7.7 Hz, 2H), 6.55 (d,  $J$  = 2.5 Hz, 1H), 6.50 (d,  $J$  = 2.4 Hz, 1H), 3.71 (s, 3H), 3.66 (s, 2H), 3.56 (s, 3H), 2.60 (s, 3H), 1.39 (s, 3H);  $^{13}\text{C}$  NMR (101 MHz,  $\text{CDCl}_3$ , ppm)  $\delta$  196.1, 181.1, 155.1, 136.3, 135.9, 135.1, 133.1, 128.4, 128.0, 120.5, 115.5, 106.8, 55.5, 46.3, 45.1, 29.8, 25.5, 19.2. HRMS (ESI)  $m/z$  calcd for  $\text{C}_{20}\text{H}_{21}\text{NNaO}_3^+$  ( $\text{M}+\text{Na}$ ) $^+$  346.1414, found 346.1433.

**1-Isopropyl-3-methyl-3-(2-oxo-2-phenylethyl)indolin-2-one (6j)**

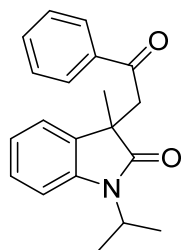

The reaction was conducted with *N*-isopropyl-*N*-phenylmethacrylamide (**1t**, 40.6 mg, 0.2 mmol), benzaldehyde (**5a**, 41.0  $\mu$ L, 0.4 mmol). Purification by thin layer chromatography was performed (petroleum ether/ethyl acetate = 5/1) to yield **6j** (39.9 mg, 65%) as a colorless liquid.

$^1\text{H}$  NMR (400 MHz,  $\text{CDCl}_3$ , ppm)  $\delta$  7.91 – 7.76 (m, 2H), 7.49 (t,  $J$  = 7.4 Hz, 1H), 7.38 (t,  $J$  = 7.7 Hz, 2H), 7.21 (td,  $J$  = 7.8, 1.1 Hz, 1H), 7.12 (d,  $J$  = 6.7 Hz, 1H), 7.07 (d,  $J$  = 7.9 Hz, 1H), 6.94 (t,  $J$  = 7.4 Hz, 1H), 4.72 (p,  $J$  = 7.0 Hz, 1H), 3.76 – 3.57 (m, 2H), 1.56 (dd,  $J$  = 16.1, 7.0 Hz, 6H), 1.41 (s, 3H);  $^{13}\text{C}$  NMR (100 MHz,  $\text{CDCl}_3$ , ppm)  $\delta$  195.8, 180.1, 142.4, 136.3, 134.1, 133.0, 128.3, 127.9, 127.4, 121.8, 121.5, 109.8, 46.0, 44.9, 43.6, 25.1, 19.4, 18.9. HRMS (ESI)  $m/z$  calcd for  $\text{C}_{20}\text{H}_{21}\text{NNaO}_2^+$  ( $\text{M}+\text{Na}$ ) $^+$  330.1465, found 330.1483.

### 1-Cyclohexyl-3-methyl-3-(2-oxo-2-phenylethyl)indolin-2-one (**6k**)

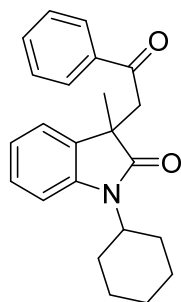

The reaction was conducted with *N*-cyclohexyl-*N*-phenylmethacrylamide (**1u**, 48.6 mg, 0.2 mmol), benzaldehyde (**5a**, 41.0  $\mu$ L, 0.4 mmol). Purification by thin layer chromatography was performed (petroleum ether/ethyl acetate = 5/1) to yield **6k**(30.5mg, 44%) as a colorless liquid.

$^1\text{H}$  NMR (400 MHz,  $\text{CDCl}_3$ , ppm)  $\delta$  7.84 (d,  $J$  = 7.4 Hz, 2H), 7.51 (t,  $J$  = 7.4 Hz, 1H), 7.39 (t,  $J$  = 7.7 Hz, 2H), 7.20 (t,  $J$  = 7.8 Hz, 1H), 7.12 (d,  $J$  = 7.9 Hz, 2H), 6.93 (t,  $J$  = 7.5 Hz, 1H), 4.33 – 4.21 (m, 1H), 3.73 – 3.59 (m, 2H), 2.20 (dtd,  $J$  = 24.7, 12.4, 3.4 Hz, 2H), 1.99 – 1.87 (m, 4H), 1.75 (d,  $J$  = 12.7 Hz, 1H), 1.49 – 1.29 (m, 6H);  $^{13}\text{C}$  NMR (101 MHz,  $\text{CDCl}_3$ , ppm)  $\delta$  195.9, 180.4, 142.8, 136.5, 134.2, 133.0, 128.4, 128.0, 127.4, 121.9, 121.4, 110.1, 52.2, 46.1, 44.9, 29.3, 28.7, 26.1, 26.0, 25.6, 25.3. HRMS (ESI)  $m/z$  calcd for  $\text{C}_{23}\text{H}_{25}\text{NNaO}_2^+$  ( $\text{M}+\text{Na}$ ) $^+$  370.1778, found 370.1796.

### 3-Benzyl-1-methyl-3-(2-oxo-2-phenylethyl)indolin-2-one (**6l**)<sup>5</sup>

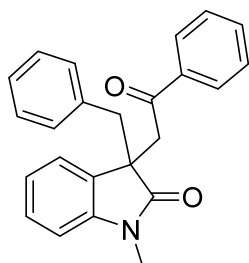

The reaction was conducted with 2-benzyl-*N*-methyl-*N*-phenylacrylamide (**1p**, 50.2 mg, 0.2 mmol), benzaldehyde (**5a**, 41.0  $\mu$ L, 0.4 mmol). Purification by thin layer chromatography was performed (petroleum ether/ethyl acetate = 5/1) to yield **6l** (34.0mg, 48%) as a white solid, mp: 111 – 114  $^{\circ}\text{C}$ .

$^1\text{H}$  NMR (400 MHz,  $\text{CDCl}_3$ , ppm)  $\delta$  7.91 – 7.79 (m, 2H), 7.52 (t,  $J$  = 7.4 Hz, 1H), 7.40 (t,  $J$  = 7.7 Hz, 2H), 7.17 (td,  $J$  = 7.7, 1.2 Hz, 1H), 7.07 (dt,  $J$  = 16.2, 7.4 Hz, 4H), 6.97 – 6.91 (m, 1H), 6.86 – 6.81 (m, 2H), 6.63 (d,  $J$  = 7.8 Hz, 1H), 3.80 (d,  $J$  = 2.9 Hz, 2H), 3.12 (q,  $J$  = 12.7 Hz, 2H), 3.04 (s,

3H);  $^{13}\text{C}$  NMR (100 MHz,  $\text{CDCl}_3$ , ppm)  $\delta$  195.8, 179.1, 144.3, 136.4, 134.8, 133.2, 130.9, 130.1, 128.5, 128.0, 127.9, 127.4, 126.7, 122.7, 121.7, 107.8, 50.9, 44.9, 44.5, 26.0.

**3-(2-(4-(*tert*-Butyl)phenyl)-2-oxoethyl)-1,3-dimethylindolin-2-one (6m)**

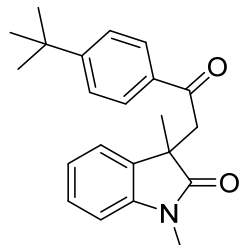

The reaction was conducted with *N*-methyl-*N*-phenylmethacrylamide (**1a**, 35.0 mg, 0.2 mmol), 4-*tert*-Butylbenzaldehyde (**5b**, 67.0  $\mu\text{L}$ , 0.4 mmol). Purification by thin layer chromatography was performed (petroleum ether/ethyl acetate = 5/1) to yield **6m** (49.5 mg, 74%) as a white solid. mp: 109 – 112  $^{\circ}\text{C}$ .

$^1\text{H}$  NMR (400 MHz,  $\text{CDCl}_3$ , ppm)  $\delta$  7.78 (d,  $J$  = 8.6 Hz, 2H), 7.40 (d,  $J$  = 8.6 Hz, 2H), 7.26 – 7.22 (m, 1H), 7.14 – 7.10 (m, 1H), 6.96 (dd,  $J$  = 15.0, 0.8 Hz, 1H), 6.89 (d,  $J$  = 7.8 Hz, 1H), 3.74 – 3.59 (m, 2H), 3.31 (s, 3H), 1.43 (s, 3H), 1.30 (s, 9H);  $^{13}\text{C}$  NMR (100 MHz,  $\text{CDCl}_3$ , ppm)  $\delta$  195.7, 180.6, 156.8, 143.8, 133.8, 127.9, 127.7, 125.4, 122.1, 121.7, 108.1, 45.9, 45.2, 35.0, 31.0, 26.4, 24.9. HRMS (ESI)  $m/z$  calcd for  $\text{C}_{22}\text{H}_{25}\text{NNaO}_2^+$  ( $\text{M}+\text{Na}$ ) $^+$  358.1778, found 358.1798.

**1,3-Dimethyl-3-(2-oxo-2-(*p*-tolyl)ethyl)indolin-2-one (6n)<sup>7</sup>**

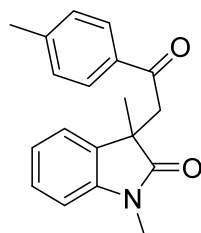

The reaction was conducted with *N*-methyl-*N*-phenylmethacrylamide (**1a**, 35.0 mg, 0.2 mmol), 4-Methylbenzaldehyde (**5c**, 47.0  $\mu\text{L}$ , 0.4 mmol). Purification by thin layer chromatography was performed (petroleum ether/ethyl acetate = 5/1) to yield **6n** (35.7 mg, 61%) as a colorless liquid.

$^1\text{H}$  NMR (400 MHz,  $\text{CDCl}_3$ , ppm)  $\delta$  7.73 (d,  $J$  = 8.2 Hz, 2H), 7.27 – 7.22 (m, 1H), 7.18 (d,  $J$  = 8.1 Hz, 2H), 7.13 (d,  $J$  = 7.2 Hz, 1H), 6.96 (t,  $J$  = 7.5 Hz, 1H), 6.89 (d,  $J$  = 7.8 Hz, 1H), 3.67 (q,  $J$  = 17.9 Hz, 2H), 3.31 (s, 3H), 2.36 (s, 3H), 1.43 (s, 3H);  $^{13}\text{C}$  NMR (101 MHz,  $\text{CDCl}_3$ , ppm)  $\delta$  195.6, 180.6, 143.9, 143.8, 133.8, 133.8, 129.1, 128.0, 127.7, 122.0, 121.7, 108.1, 45.8, 45.2, 26.4, 24.9, 21.5.

**(2-(2-Methoxyphenyl)-2-oxoethyl)-1,3-dimethylindolin-2-one (6o)**

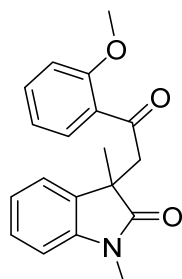

The reaction was conducted with *N*-methyl-*N*-phenylmethacrylamide (**1a**, 35.0 mg, 0.2 mmol), 2-Methoxybenzaldehyde (**5d**, 54.4 mg, 0.4 mmol). Purification by thin layer chromatography was performed (petroleum ether/ethyl acetate = 5/1) to yield **6o** (33.3 mg, 54%) as a white solid. mp: 102 – 104 °C.

<sup>1</sup>H NMR (400 MHz, CDCl<sub>3</sub>, ppm) δ 7.47 – 7.36 (m, 2H), 7.23 (d, *J* = 7.7 Hz, 1H), 7.12 (d, *J* = 7.3 Hz, 1H), 6.97 (t, *J* = 7.5 Hz, 1H), 6.91 (d, *J* = 8.3 Hz, 1H), 6.70 – 6.85 (m, 2H), 3.92 (s, 3H), 3.79 – 3.65 (m, 2H), 3.28 (s, 3H), 1.39 (s, 3H); <sup>13</sup>C NMR (100 MHz, CDCl<sub>3</sub>, ppm) δ 197.9, 180.8, 158.6, 143.8, 134.0, 133.6, 130.4, 127.6, 127.2, 121.9, 121.7, 120.5, 111.3, 108.0, 55.5, 51.2, 45.7, 26.4, 25.0. HRMS (ESI) *m/z* calcd for C<sub>19</sub>H<sub>19</sub>NNaO<sub>3</sub><sup>+</sup> (*M*+Na)<sup>+</sup> 332.1257, found 332.1276.

**3-(2-(4-Methoxyphenyl)-2-oxoethyl)-1,3-dimethylindolin-2-one (6p)<sup>7</sup>**

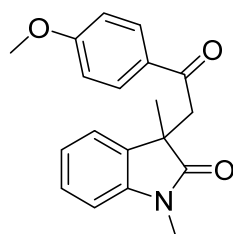

The reaction was conducted with *N*-methyl-*N*-phenylmethacrylamide (**1a**, 35.0 mg, 0.2 mmol), 4-methoxybenzaldehyde (**5e**, 49.0 μL, 0.4 mmol). Purification by thin layer chromatography was performed (petroleum ether/ethyl acetate = 5/1) to yield **6p** (40.1 mg, 65%) as a colorless liquid.

<sup>1</sup>H NMR (400 MHz, CDCl<sub>3</sub>, ppm) δ 7.82 (d, *J* = 8.8 Hz, 2H), 7.27 – 7.22 (m, 1H), 7.13 (d, *J* = 7.2 Hz, 1H), 6.97 (t, *J* = 7.5 Hz, 1H), 6.90 (d, *J* = 7.8 Hz, 1H), 6.86 (d, *J* = 8.9 Hz, 2H), 3.83 (s, 3H), 3.72 – 3.57 (m, 2H), 3.31 (s, 3H), 1.43 (s, 3H); <sup>13</sup>C NMR (101 MHz, CDCl<sub>3</sub>, ppm) δ 194.6, 180.8, 163.5, 143.8, 133.9, 130.2, 129.4, 127.7, 122.1, 121.7, 113.6, 108.1, 55.4, 45.6, 45.3, 26.4, 24.9.

### 3-(2-(4-Fluorophenyl)-2-oxoethyl)-1,3-dimethylindolin-2-one (**6q**)

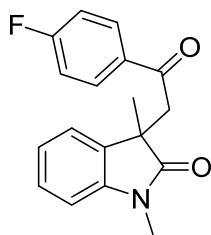

The reaction was conducted with *N*-methyl-*N*-phenylmethacrylamide (**1a**, 35.0 mg, 0.2 mmol), 4-fluoro-Benzaldehyde (**5f**, 43.0  $\mu$ L, 0.4 mmol). Purification by thin layer chromatography was performed (petroleum ether/ethyl acetate = 5/1) to yield **6q** (24.9 mg, 42%) as a white solid. mp: 107 – 109 °C.

$^1\text{H}$  NMR (400 MHz,  $\text{CDCl}_3$ , ppm)  $\delta$  7.91 – 7.81 (m, 2H), 7.29 – 7.24 (m, 1H), 7.13 (d,  $J$  = 7.3 Hz, 1H), 7.10 – 7.03 (m, 2H), 6.98 (td,  $J$  = 7.6, 0.8 Hz, 1H), 6.90 (d,  $J$  = 7.8 Hz, 1H), 3.65 (d,  $J$  = 3.4 Hz, 2H), 3.31 (s, 3H), 1.44 (s, 3H);  $^{13}\text{C}$  NMR (101 MHz,  $\text{CDCl}_3$ , ppm)  $\delta$  194.5, 167.0, 164.5, 143.8, 133.6, 132.8, 132.8, 130.6, 130.6, 127.9, 122.2, 121.7, 115.7, 115.5, 108.2, 45.9, 45.3, 26.4, 24.9. HRMS (ESI)  $m/z$  calcd for  $\text{C}_{18}\text{H}_{16}\text{FNNaO}_2^+$  ( $\text{M}+\text{Na}$ ) $^+$  320.1057, found 320.1076.

### 3-(2-(4-Chlorophenyl)-2-oxoethyl)-1,3-dimethylindolin-2-one (**6r**)<sup>6</sup>

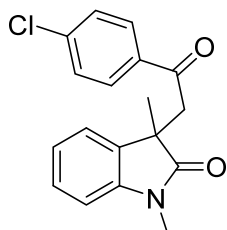

The reaction was conducted with *N*-methyl-*N*-phenylmethacrylamide (**1a**, 35.0 mg, 0.2 mmol), 4-Chlorobenzaldehyde (**5g**, 56.0 mg, 0.4 mmol). Purification by thin layer chromatography was performed (petroleum ether/ethyl acetate = 5/1) to yield **6r** (27.5 mg, 44%) as a colorless liquid.

$^1\text{H}$  NMR (400 MHz,  $\text{CDCl}_3$ , ppm)  $\delta$  7.77 (d,  $J$  = 8.6 Hz, 2H), 7.37 (d,  $J$  = 8.6 Hz, 2H), 7.25 (d,  $J$  = 15.6 Hz, 1H), 7.13 (d,  $J$  = 7.2 Hz, 1H), 6.99 (t,  $J$  = 7.5 Hz, 1H), 6.91 (d,  $J$  = 7.8 Hz, 1H), 3.70 – 3.60 (m, 2H), 3.31 (s, 3H), 1.44 (s, 3H);  $^{13}\text{C}$  NMR (100 MHz,  $\text{CDCl}_3$ , ppm)  $\delta$  194.9, 180.4, 143.8, 139.6, 134.6, 133.5, 129.4, 128.8, 127.9, 122.2, 121.7, 108.2, 45.9, 45.2, 26.4, 24.9.

### 3-(2-(4-Bromophenyl)-2-oxoethyl)-1,3-dimethylindolin-2-one (**6s**)<sup>6</sup>

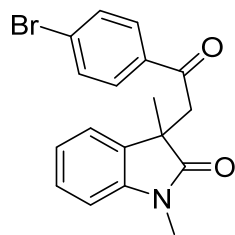

The reaction was conducted with *N*-methyl-*N*-phenylmethacrylamide (**1a**, 35.0 mg, 0.2 mmol), 4-Bromobenzaldehyde (**5h**, 47  $\mu$ L, 0.4 mmol). Purification by thin layer chromatography was performed (petroleum ether/ethyl acetate = 5/1) to yield **6s** (28.6 mg, 40%) as a colorless liquid.

<sup>1</sup>H NMR (400 MHz, CDCl<sub>3</sub>, ppm)  $\delta$  7.69 (d,  $J$  = 8.5 Hz, 2H), 7.54 (d,  $J$  = 8.5 Hz, 2H), 7.25 (d,  $J$  = 15.6 Hz, 1H), 7.13 (d,  $J$  = 7.3 Hz, 1H), 6.99 (t,  $J$  = 7.5 Hz, 1H), 6.91 (d,  $J$  = 7.8 Hz, 1H), 3.69 – 3.60 (m, 2H), 3.31 (s, 3H), 1.43 (s, 3H); <sup>13</sup>C NMR (100 MHz, CDCl<sub>3</sub>, ppm)  $\delta$  195.1, 180.4, 143.8, 135.0, 133.5, 131.8, 129.5, 128.4, 127.9, 122.2, 121.7, 108.2, 45.9, 45.2, 26.4, 24.9.

### 1,3-Dimethyl-3-(2-oxo-2-(thiophen-2-yl)ethyl)indolin-2-one (**6t**)<sup>7</sup>

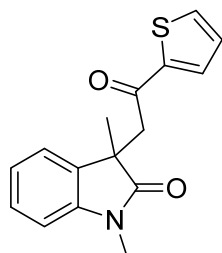

The reaction was conducted with *N*-methyl-*N*-phenylmethacrylamide (**1a**, 35.0 mg, 0.2 mmol), 2-Thenaldehyde (**5i**, 44.8 mg, 0.4 mmol). Purification by thin layer chromatography was performed (petroleum ether/ethyl acetate = 5/1) to yield **6t** (24.5 mg, 43%) as a colorless liquid.

<sup>1</sup>H NMR (400 MHz, CDCl<sub>3</sub>, ppm)  $\delta$  7.67 (dd,  $J$  = 3.8, 1.2 Hz, 1H), 7.57 (dd,  $J$  = 4.9, 1.1 Hz, 1H), 7.25 (td,  $J$  = 7.7, 1.3 Hz, 1H), 7.17 (dd,  $J$  = 7.4, 1.3 Hz, 1H), 7.07 (dd,  $J$  = 4.9, 3.8 Hz, 1H), 6.98 (td,  $J$  = 7.5, 1.0 Hz, 1H), 6.88 (d,  $J$  = 7.6 Hz, 1H), 3.67 – 3.52 (m, 2H), 3.29 (s, 3H), 1.44 (s, 3H); <sup>13</sup>C NMR (100 MHz, CDCl<sub>3</sub>, ppm)  $\delta$  188.3, 179.8, 143.6, 142.8, 133.7, 133.3, 131.6, 128.4, 127.9, 122.7, 121.9, 108.2, 46.2, 45.3, 26.4, 24.6.

**3-(2-(2,4-Dimethoxyphenyl)-2-oxoethyl)-1,3-dimethylindolin-2-one (6u)**

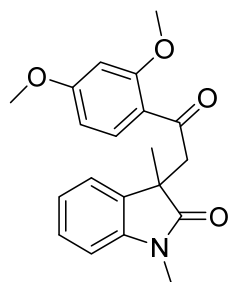

The reaction was conducted with *N*-methyl-*N*-phenylmethacrylamide (**1a**, 35.0 mg, 0.2 mmol), 2, 4-dimethoxy benzaldehyde (**5j**, 66.4 mg, 0.4 mmol). Purification by thin layer chromatography was performed (petroleum ether/ethyl acetate = 3/1) to yield **6u** (29.1 mg, 43%) as a white solid. mp: 151 – 154 °C.

<sup>1</sup>H NMR (400 MHz, CDCl<sub>3</sub>, ppm) δ 7.58 (d, *J* = 9.4 Hz, 1H), 7.23 (t, *J* = 7.7 Hz, 1H), 7.11 (d, *J* = 7.2 Hz, 1H), 6.95 (t, *J* = 7.5 Hz, 1H), 6.88 (d, *J* = 7.7 Hz, 1H), 6.40 (d, *J* = 7.0 Hz, 2H), 3.91 (s, 3H), 3.80 (s, 3H), 3.77 – 3.62 (m, 2H), 3.30 (s, 3H); <sup>13</sup>C NMR (100 MHz, CDCl<sub>3</sub>, ppm) δ 195.5, 181.1, 164.5, 160.8, 143.8, 134.4, 132.8, 127.4, 121.8, 121.5, 120.1, 107.9, 104.9, 98.1, 55.4, 55.3, 51.2, 45.6, 26.4, 25.1. HRMS (ESI) *m/z* calcd for C<sub>20</sub>H<sub>21</sub>NNaO<sub>4</sub><sup>+</sup> (*M*+Na)<sup>+</sup> 362.1363, found 362.1385.

**1,3-Dimethyl-3-(2-oxo-2-(3,4,5-trimethoxyphenyl)ethyl)indolin-2-one (6v)**

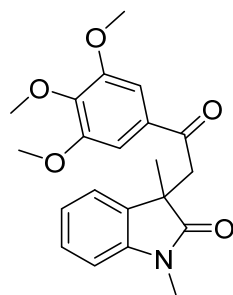

The reaction was conducted with *N*-methyl-*N*-phenylmethacrylamide (**1a**, 35.0 mg, 0.2 mmol), 3,4,5-trimethoxybenzaldehyde (**5k**, 79.2 mg, 0.4 mmol). Purification by thin layer chromatography was performed (petroleum ether/ethyl acetate = 3/1) to yield **6v** (22.1 mg, 30%) as a white solid. mp: 168 – 170 °C.

<sup>1</sup>H NMR (400 MHz, CDCl<sub>3</sub>, ppm) δ 7.29 – 7.24 (m, 1H), 7.15 (d, *J* = 7.8 Hz, 1H), 7.08 (s, 2H), 7.00 (td, *J* = 7.5, 1.0 Hz, 1H), 6.91 (d, *J* = 7.8 Hz, 1H), 3.87 (d, *J* = 8.1 Hz, 9H), 3.66 (d, *J* = 2.3 Hz, 2H), 3.31 (s, 3H), 1.45 (s, 3H); <sup>13</sup>C NMR (100 MHz, CDCl<sub>3</sub>, ppm) δ 195.0, 180.5, 152.9,

143.7, 142.6, 133.7, 131.5, 127.8, 122.2, 121.8, 108.1, 105.5, 60.9, 56.3, 45.8, 45.4, 26.4, 25.0.

HRMS (ESI)  $m/z$  calcd for  $C_{21}H_{23}NNaO_5^+$  ( $M+Na$ ) $^+$  392.1468, found 392.1491.

### 1,3-Dimethyl-3-(2-oxo-4-phenylbutyl)indolin-2-one (**6w**)

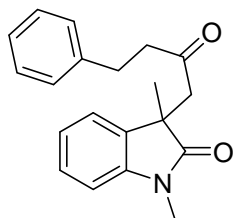

The reaction was conducted with *N*-methyl-*N*-phenylmethacrylamide (**1a**, 35.0 mg, 0.2 mmol), 3-phenylpropionaldehyde (**5l**, 53  $\mu$ L, 0.4 mmol). Purification by thin layer chromatography was performed (petroleum ether/ethyl acetate = 5/1) to yield **6w** (27.6 mg, 45%) as a colorless liquid.

$^1H$  NMR (400 MHz,  $CDCl_3$ , ppm)  $\delta$  7.27 – 7.17 (m, 6H), 7.09 – 6.99 (m, 3H), 6.87 (d,  $J$  = 7.7 Hz, 1H), 3.27 (s, 3H), 3.12 – 3.00 (m, 2H), 2.74 – 2.47 (m, 4H), 1.32 (s, 3H);  $^{13}C$  NMR (100 MHz,  $CDCl_3$ , ppm)  $\delta$  206.0, 180.3, 143.6, 140.7, 133.3, 128.4, 128.1, 127.9, 126.0, 122.2, 121.7, 108.2, 49.8, 45.1, 44.3, 29.3, 26.4, 24.4. HRMS (ESI)  $m/z$  calcd for  $C_{20}H_{21}NNaO_2^+$  ( $M+Na$ ) $^+$  330.1465, found 330.1474.

### 1,3-Dimethyl-3-(2-oxoheptyl)indolin-2-one (**6x**)<sup>8</sup>

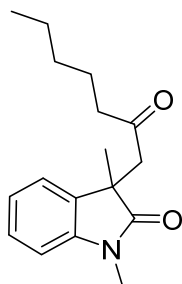

The reaction was conducted with *N*-methyl-*N*-phenylmethacrylamide (**1a**, 35.0 mg, 0.2 mmol), hexaldehyde (**5m**, 48  $\mu$ L, 0.4 mmol). Purification by thin layer chromatography was performed (petroleum ether/ethyl acetate = 5/1) to yield **6x** (27.8 mg, 51%) as a colorless liquid.

$^1H$  NMR (400 MHz,  $CDCl_3$ , ppm)  $\delta$  7.27 – 7.22 (m, 1H), 7.13 (d,  $J$  = 6.8 Hz, 1H), 7.00 (t,  $J$  = 7.3 Hz, 1H), 6.86 (d,  $J$  = 7.8 Hz, 1H), 3.27 (s, 3H), 3.07 (s, 2H), 2.32 – 2.17 (m, 2H), 1.40 (m, 2H), 1.33 (s, 3H), 1.25 – 1.08 (m, 4H), 0.82 (t,  $J$  = 7.2 Hz, 3H);  $^{13}C$  NMR (100 MHz,  $CDCl_3$ , ppm)  $\delta$  207.1, 180.4, 143.7, 133.5, 127.8, 122.1, 121.7, 108.1, 49.6, 45.1, 42.7, 31.1, 26.4, 24.4, 23.1, 22.3,

13.8.

**3a,8-Dimethyl-2-phenyl-3,3a,8,8a-tetrahydro-2H-furo[2,3-b]indole (7)**

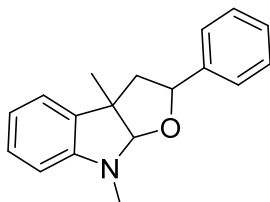

The reaction was conducted with 1,3-dimethyl-3-(2-oxo-2-phenylethyl)indolin-2-one (**6a**, 55.8 mg, 0.2 mmol). Purification by thin layer chromatography was performed (petroleum ether/ethyl acetate = 100/1) to yield **7** (51.7 mg, 92%) as a colorless liquid.

$^1\text{H}$  NMR (400 MHz,  $\text{CDCl}_3$ , ppm)  $\delta$  7.32 (d,  $J$  = 4.2 Hz, 2H), 7.29 – 7.02 (m, 8H), 7.00 (d,  $J$  = 7.2 Hz, 1H), 6.66 (t,  $J$  = 7.4 Hz, 1H), 6.43 (d,  $J$  = 7.7 Hz, 1H), 5.29(s, 0.5H), 5.13(s, 1H), 5.11(dd,  $J$  = 9.2 Hz, 6.4 Hz, 1H), 4.66(dd,  $J$  = 11.2 Hz, 4.4 Hz, 0.5H) 3.01 (s, 3H), 2.97 (s, 1.5H), 2.49(dd,  $J$  = 12.0 Hz, 4.4 Hz, 0.5H), 2.46 (dd,  $J$  = 12.5, 6.3 Hz, 1H), 2.14 (dd,  $J$  = 12.4, 9.1 Hz, 1H), 2.00(t,  $J$  = 12.0 Hz, 0.5H), 1.51 (s, 1.5H), 1.47 (s, 3H);  $^{13}\text{C}$  NMR (100 MHz,  $\text{CDCl}_3$ , ppm)  $\delta$  150.7, 148.8, 141.9, 141.0, 135.6, 134.5, 128.3, 128.2, 128.1, 128.0, 127.6, 127.3, 126.0, 122.5, 122.2, 117.6, 117.3, 107.2, 106.0, 104.9, 104.8, 80.4, 79.7, 53.1, 52.5, 50.5, 49.0, 31.8, 30.9, 24.9, 23.3. HRMS (ESI)  $m/z$  calcd for  $\text{C}_{18}\text{H}_{19}\text{NNaO}^+$  ( $\text{M}+\text{Na}$ ) $^+$  288.1359, found 288.1360. dr 2:1.

**3-(2-Hydroxy-2-phenylethyl)-1,3-dimethylindolin-2-one (8)**

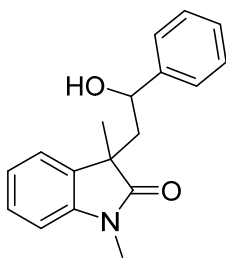

The reaction was conducted with 1,3-dimethyl-3-(2-oxo-2-phenylethyl)indolin-2-one (**6a**, 55.8 mg, 0.2 mmol). Purification by thin layer chromatography was performed (petroleum ether/ethyl acetate = 3/1) to yield **8** (51.7 mg, 92%) as a colorless liquid.

$^1\text{H}$  NMR (400 MHz,  $\text{CDCl}_3$ , ppm)  $\delta$  7.30 – 7.26 (m, 2H), 7.26 – 7.18 (m, 6H), 7.17 (s, 1H), 7.06 (d,  $J$  = 7.4 Hz, 1H), 6.81 (d,  $J$  = 7.8 Hz, 1H), 4.85 (dd,  $J$  = 8.9, 3.8 Hz, 1H), 4.22-4.24 (d,  $J$  = 8.0 Hz, 0.3H), 4.12 (s, 1H), 3.21 (s, 1H), 3.07 (s, 3H), 2.54-2.48 (m, 0.3H), 2.24-2.23 (d,  $J$  = 4.0 Hz, 0.3H), 2.20 (d,  $J$  = 3.9 Hz, 1H), 2.14-2.13 (d,  $J$  = 4.0 Hz, 0.3H), 2.09 (dd,  $J$  = 14.5, 9.0 Hz, 1H),

1.49 (s, 3H), 1.36 (s, 1H);  $^{13}\text{C}$  NMR (100 MHz,  $\text{CDCl}_3$ , ppm)  $\delta$  181.4, 181.3, 144.4, 143.8, 143.5, 142.4, 134.3, 133.2, 128.2, 128.1, 128.0, 127.8, 127.3, 127.3, 126.0, 125.4, 122.8, 122.5, 122.3, 108.3, 108.2, 71.5, 71.3, 47.2, 47.0, 46.9, 46.2, 26.3, 26.2, 25.2, 23.4. HRMS (ESI)  $m/z$  calcd for  $\text{C}_{18}\text{H}_{19}\text{NNaO}_2^+$  ( $\text{M}+\text{Na}$ ) $^+$  304.1308, found 304.1314. dr 3:1.

**(E)-1,3-Dimethyl-3-styrylindolin-2-one (9)**

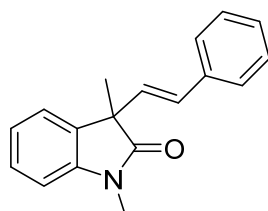

The reaction was conducted with 3-(2-hydroxy-2-phenylethyl)-1,3-dimethylindolin-2-one (**8**, 56.2 mg, 0.2 mmol). Purification by thin layer chromatography was performed (petroleum ether/ethyl acetate = 20/1) to yield **9** (45.0 mg, 86%) as a white solid, mp: 130-132.

$^1\text{H}$  NMR (400 MHz,  $\text{CDCl}_3$ , ppm)  $\delta$  7.35 – 7.10 (m, 8H), 6.89 (d,  $J$  = 7.8 Hz, 1H), 6.46 – 6.30 (m, 2H), 3.23 (s, 3H), 1.59 (s, 3H);  $^{13}\text{C}$  NMR (101 MHz,  $\text{CDCl}_3$ , ppm)  $\delta$  178.7, 143.0, 136.5, 132.8, 130.0, 129.8, 128.4, 128.1, 127.6, 126.4, 123.9, 122.6, 108.3, 50.7, 26.3, 23.1. HRMS (ESI)  $m/z$  calcd for  $\text{C}_{18}\text{H}_{17}\text{NNaO}^+$  ( $\text{M}+\text{Na}$ ) $^+$  286.1202, found 286.1213.

## 6. References

- 1 (a) S. Arai, Y. Koike and A. Nishida, Catalytic Dicyanative 5-exo- and 6-endo-Cyclization Triggered by Cyanopalladation of Alkynes, *Adv. Synth. Catal.*, 2010, **352**, 893-900; (b) S. Chanthamath, S. Takaki, K. Shibatomi and S. Iwasa, Highly stereoselective cyclopropanation of  $\alpha,\beta$ -unsaturated carbonyl compounds with methyl (diazoacetoxy)acetate catalyzed by a chiral ruthenium(II) complex, *Angew. Chem. Int. Ed.*, 2013, **52**, 5818-5821; (c) Lutz Ackermann, Alexander V. Lygin and N. Hofmann, Ruthenium-Catalyzed Oxidative Synthesis of 2-Pyridones through C-H/N-H Bond Functionalizations, *Org. Lett.*, 2011, **13**, 3278-3281; (d) T. Wu, X. Mu and G. Liu, Palladium-catalyzed oxidative arylalkylation of activated alkenes: dual C-H bond cleavage of an arene and acetonitrile, *Angew. Chem. Int. Ed.*, 2011, **50**, 12578-12581; (e) J. Zhang and T. P. Loh, Ruthenium- and rhodium-catalyzed cross-coupling reaction of acrylamides with alkenes: efficient access to (Z,E)-dienamides, *Chem. Commun.*, 2012, **48**, 11232-11234; (f) Z. Liu, S. Zhong, X. Ji, G.-J. Deng and H. Huang, Hydroarylation of Activated Alkenes Enabled by Proton-Coupled Electron Transfer, *ACS Catal.*, 2021, **11**, 4422-4429.
- 2 (a) J. Buter, D. Heijnen, I. C. Wan, F. M. Bickelhaupt, D. C. Young, E. Otten, D. B. Moody and A. J. Minnaard, Stereoselective Synthesis of 1-Tuberculosinyl Adenosine; a Virulence Factor of *Mycobacterium tuberculosis*, *J. Org. Chem.*, 2016, **81**, 6686-6696; (b) Y. H. Lee, E. H. Denton and B. Morandi, Modular Cyclopentenone Synthesis through the Catalytic Molecular Shuffling of Unsaturated Acid Chlorides and Alkynes, *J. Am. Chem. Soc.*, 2020, **142**, 20948-20955.
- 3 L. Yang, W. Lu, W. Zhou and F. Zhang, Metal-free cascade oxidative decarbonylative alkylarylation of acrylamides with aliphatic aldehydes: a convenient approach to oxindoles via dual C(sp<sup>2</sup>)-H bond functionalization, *Green. Chem.*, 2016, **18**, 2941-2945.
- 4 H. Wang, L. N. Guo and X. H. Duan, Palladium-catalyzed alkylarylation of acrylamides with unactivated alkyl halides, *J. Org. Chem.*, 2016, **81**, 860-867.
- 5 L. Zheng, H. Huang, C. Yang and W. Xia, UV light-mediated difunctionalization of alkenes through aroyl radical addition/1,4-/1,2-aryl shift cascade reactions, *Org. Lett.*, 2015, **17**, 1034-1037.
- 6 P. Biswas, S. Mandal and J. Guin, Aerobic Acylarylation of  $\alpha,\beta$ -Unsaturated Amides with

- Aldehydes, *Org. Lett.*, 2020, **22**, 4294-4299.
- 7 G. Bergonzini, C. Cassani and C. J. Wallentin, Acyl Radicals from Aromatic Carboxylic Acids by Means of Visible-Light Photoredox Catalysis, *Angew. Chem. Int. Ed.*, 2015, **54**, 14066-14069.
- 8 X. Fan, T. Lei, B. Chen, C. H. Tung and L. Z. Wu, Photocatalytic C-C Bond Activation of Oxime Ester for Acyl Radical Generation and Application, *Org. Lett.*, 2019, **21**, 4153-4158.

## 7. Copies of $^1\text{H}$ , $^{13}\text{C}$ and $^{19}\text{F}$ NMR spectra of all products

### $^1\text{H}$ and $^{13}\text{C}$ NMR spectra of **3a**

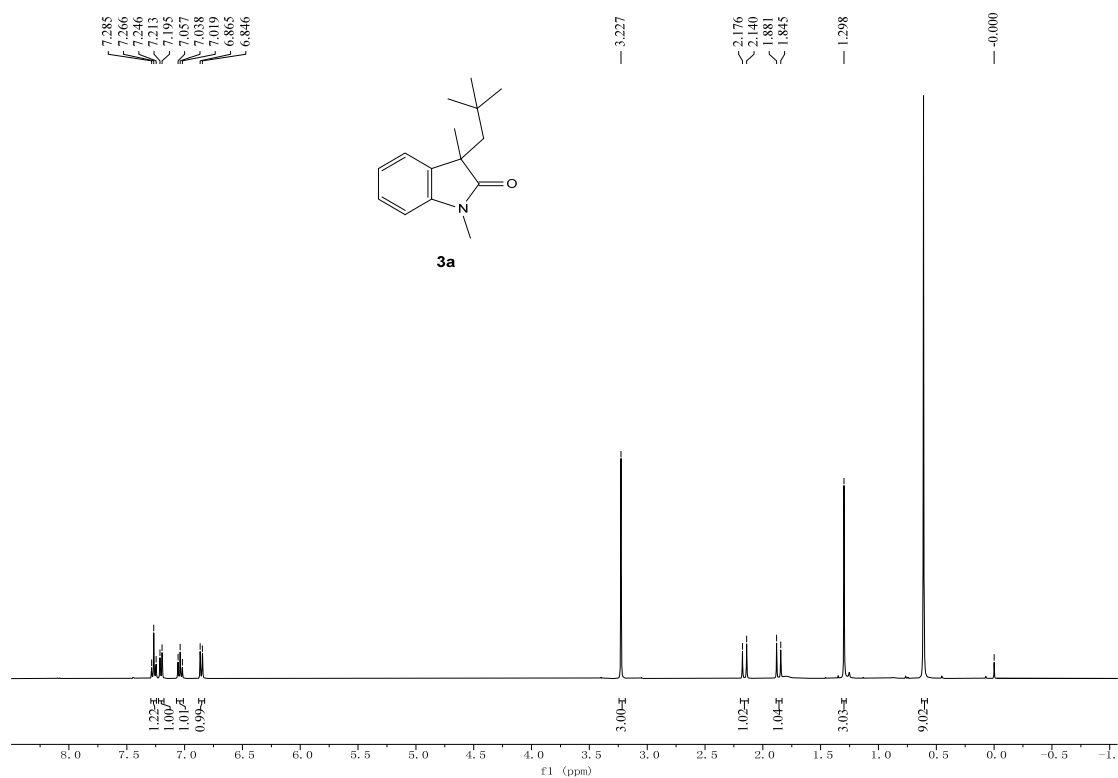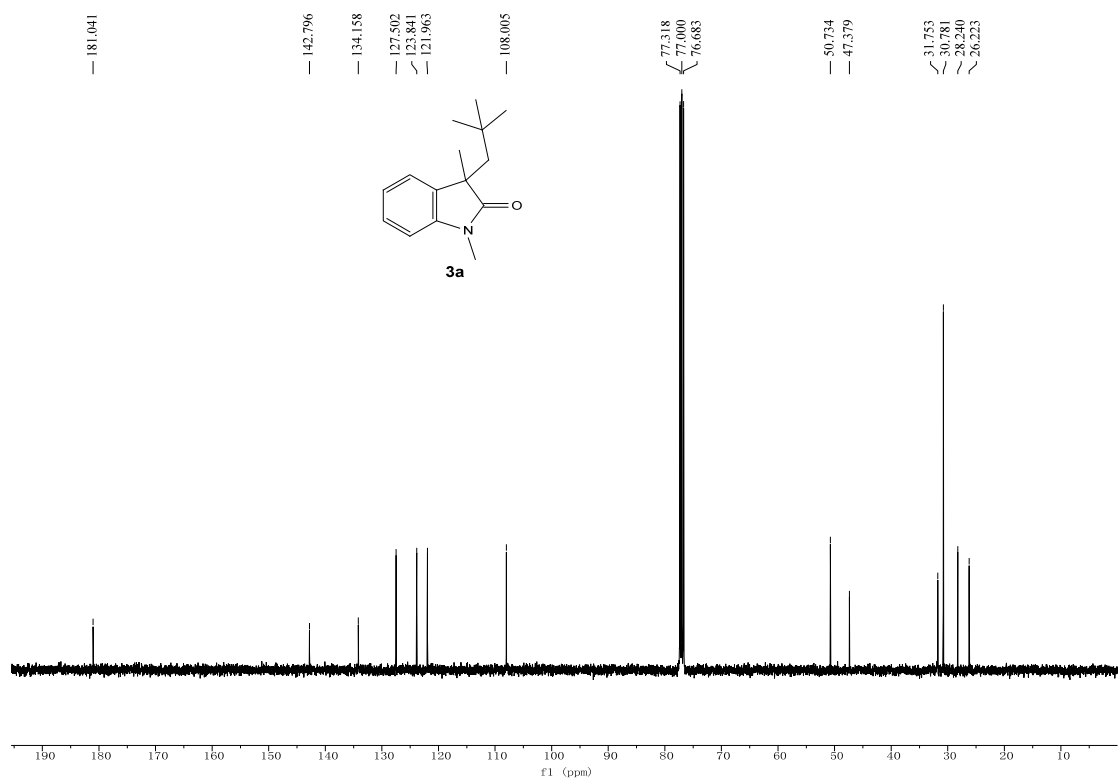

# <sup>1</sup>H and <sup>13</sup>C NMR spectra of 3b

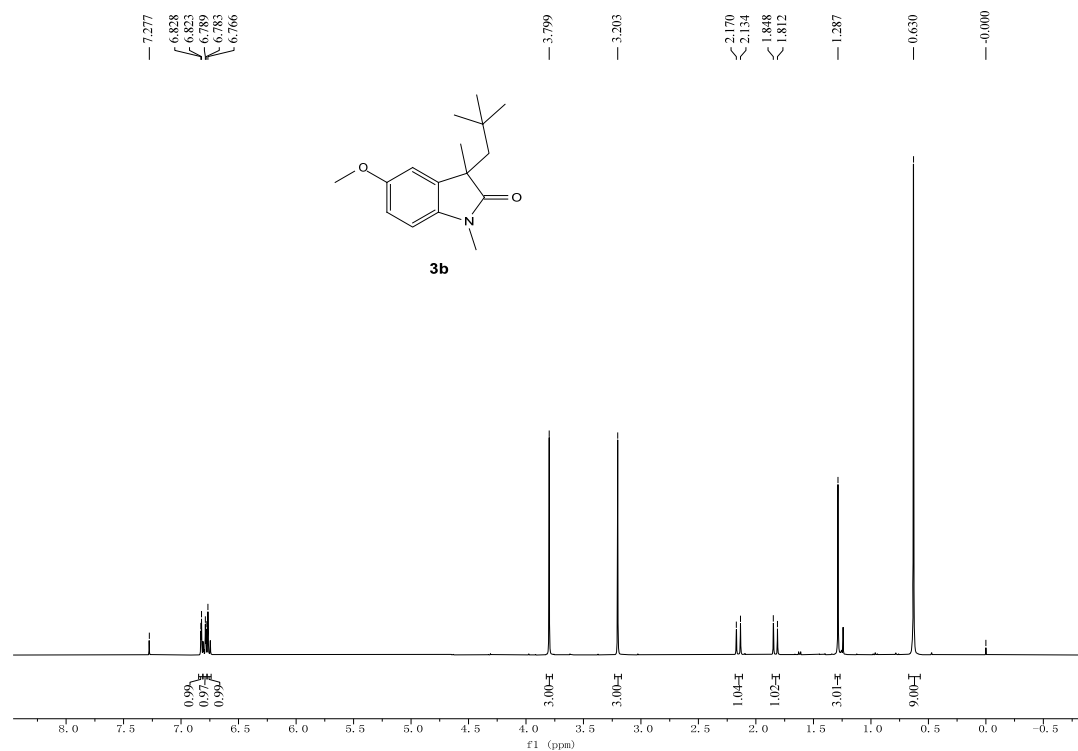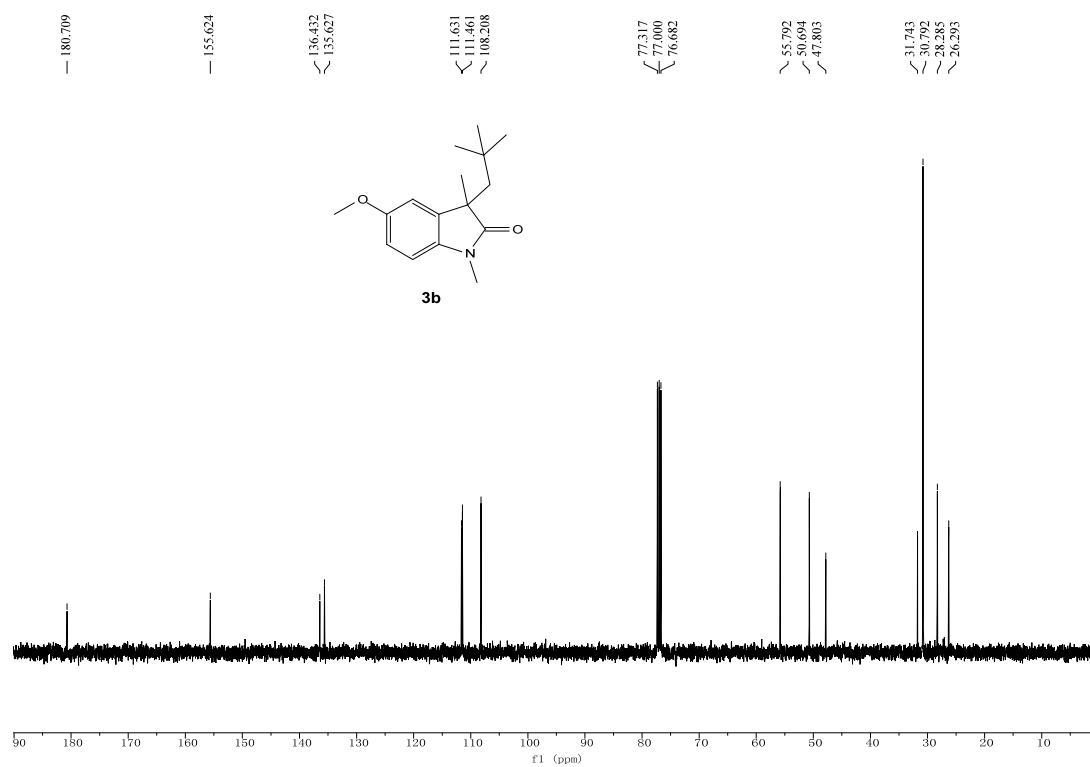

# <sup>1</sup>H and <sup>13</sup>C NMR spectra of 3c

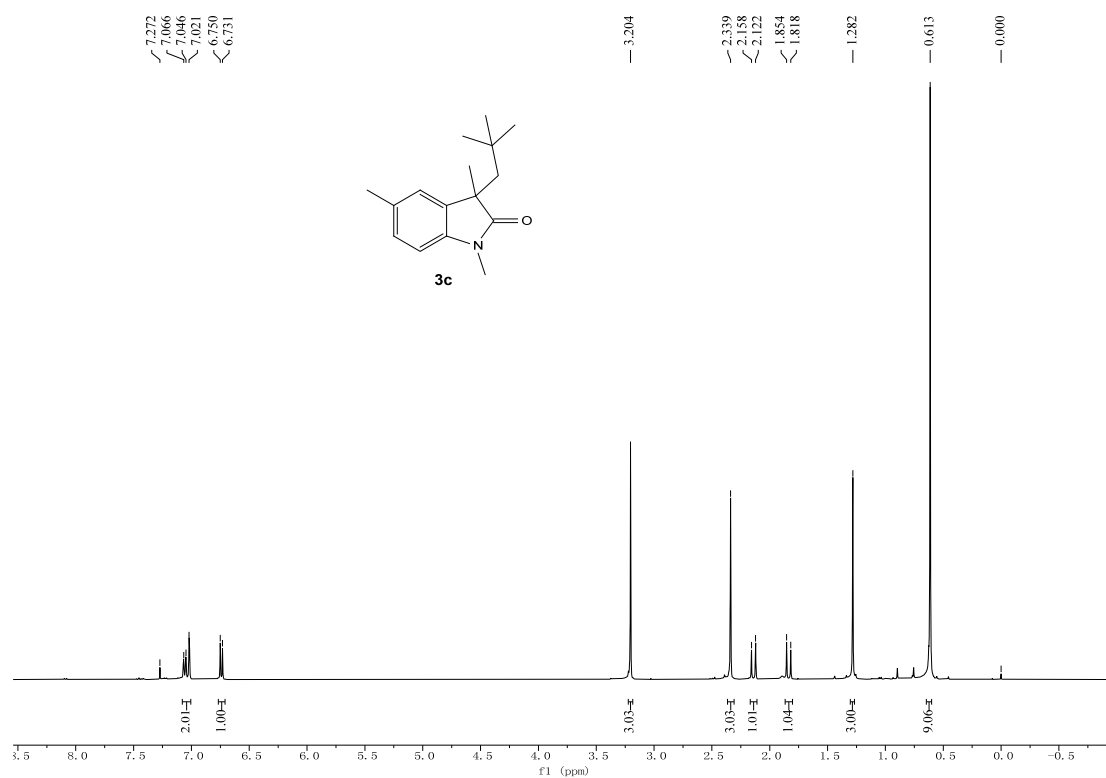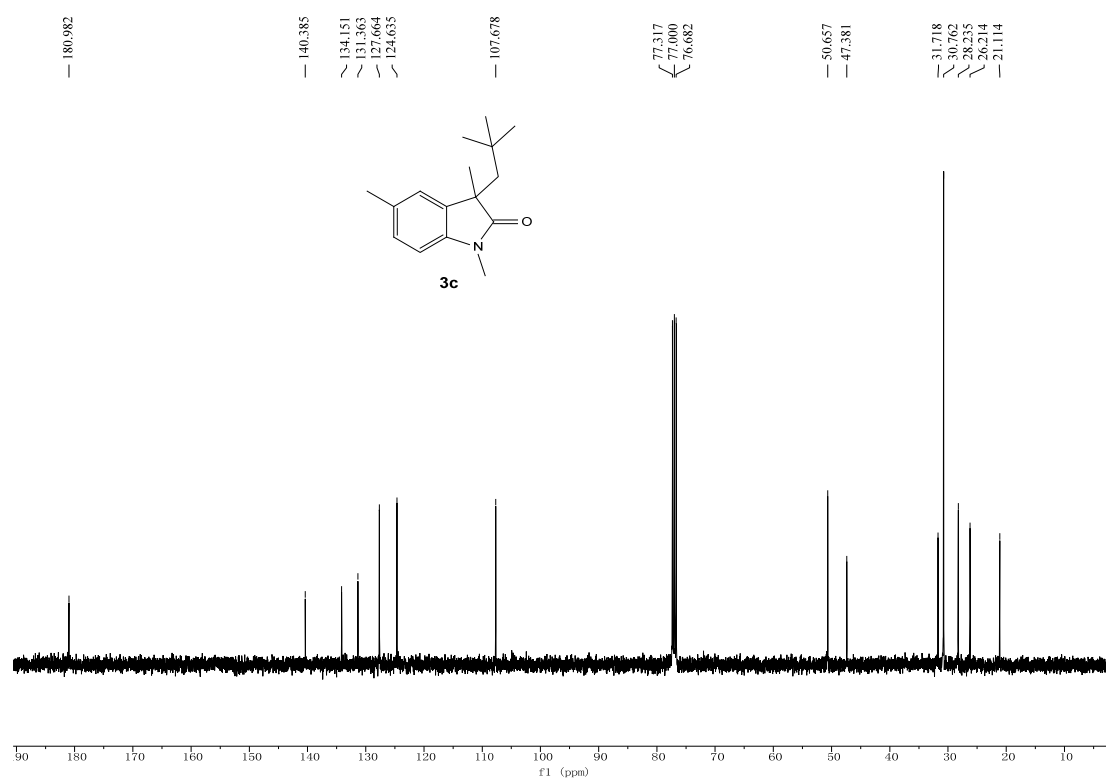

# <sup>1</sup>H and <sup>13</sup>C NMR spectra of 3d

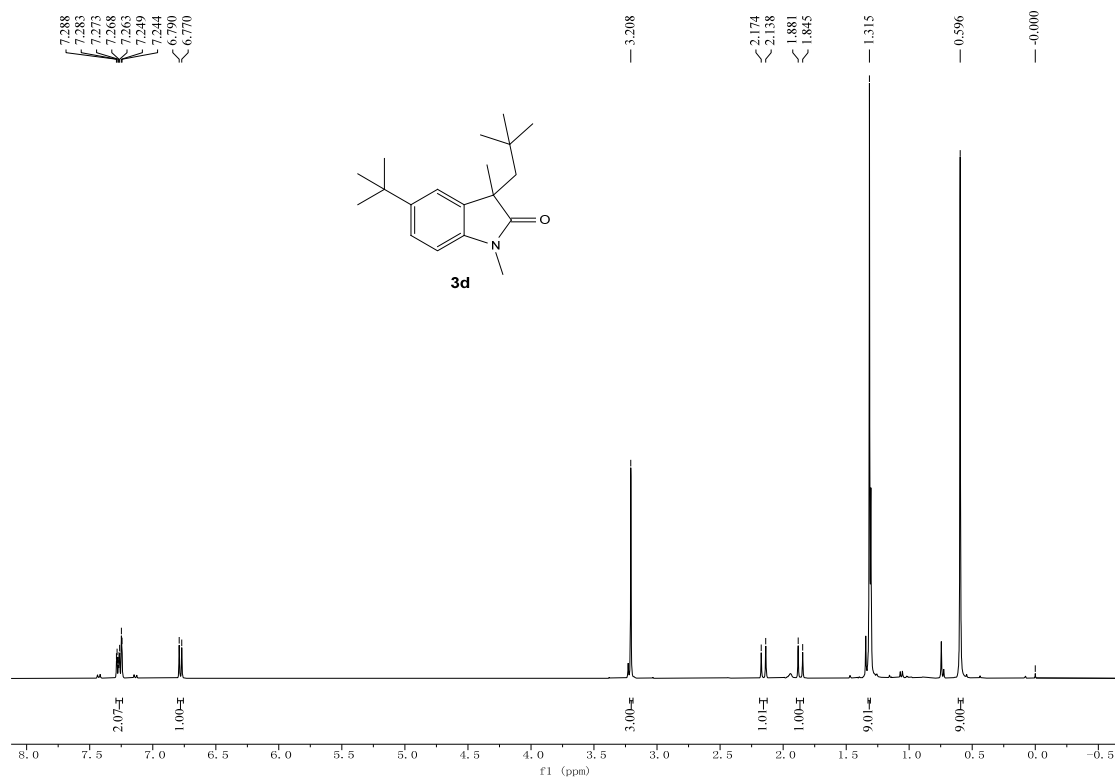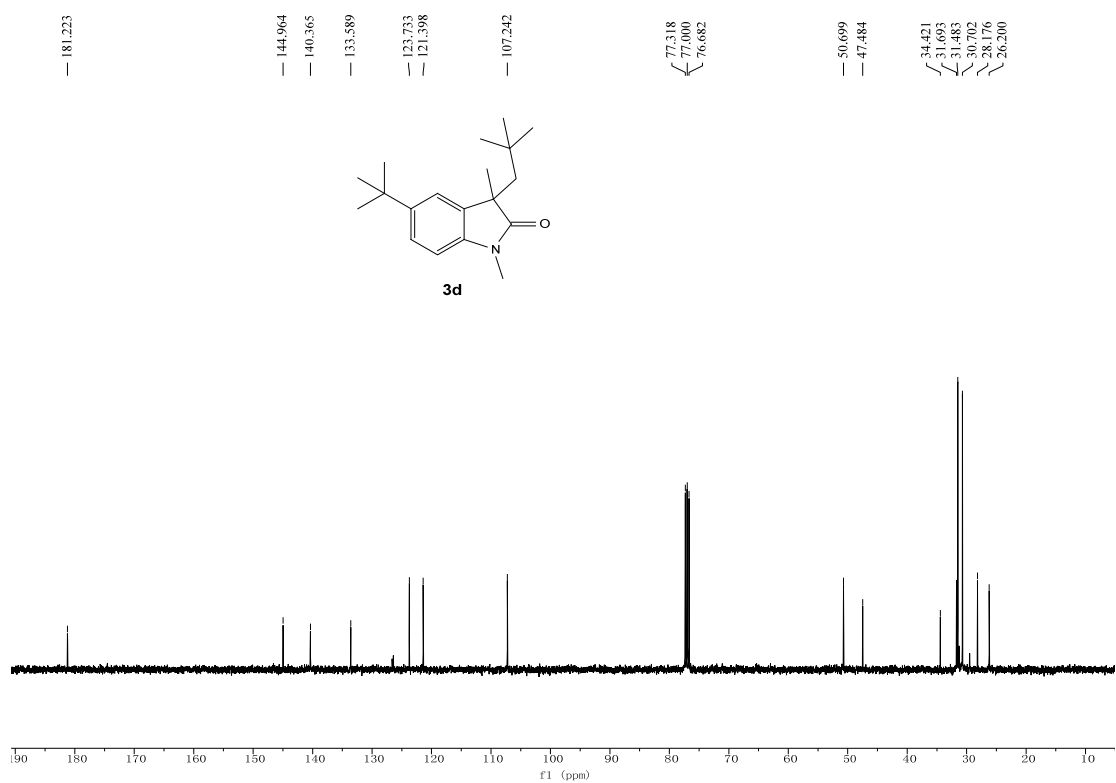

# <sup>1</sup>H and <sup>13</sup>C NMR spectra of 3e

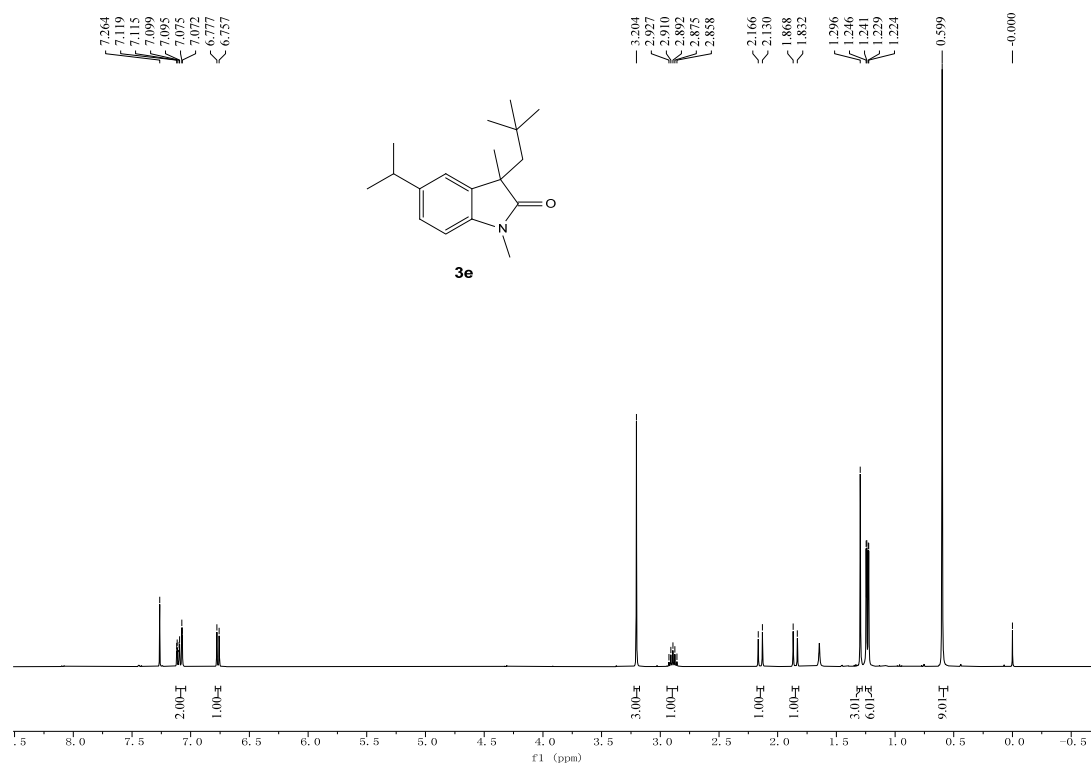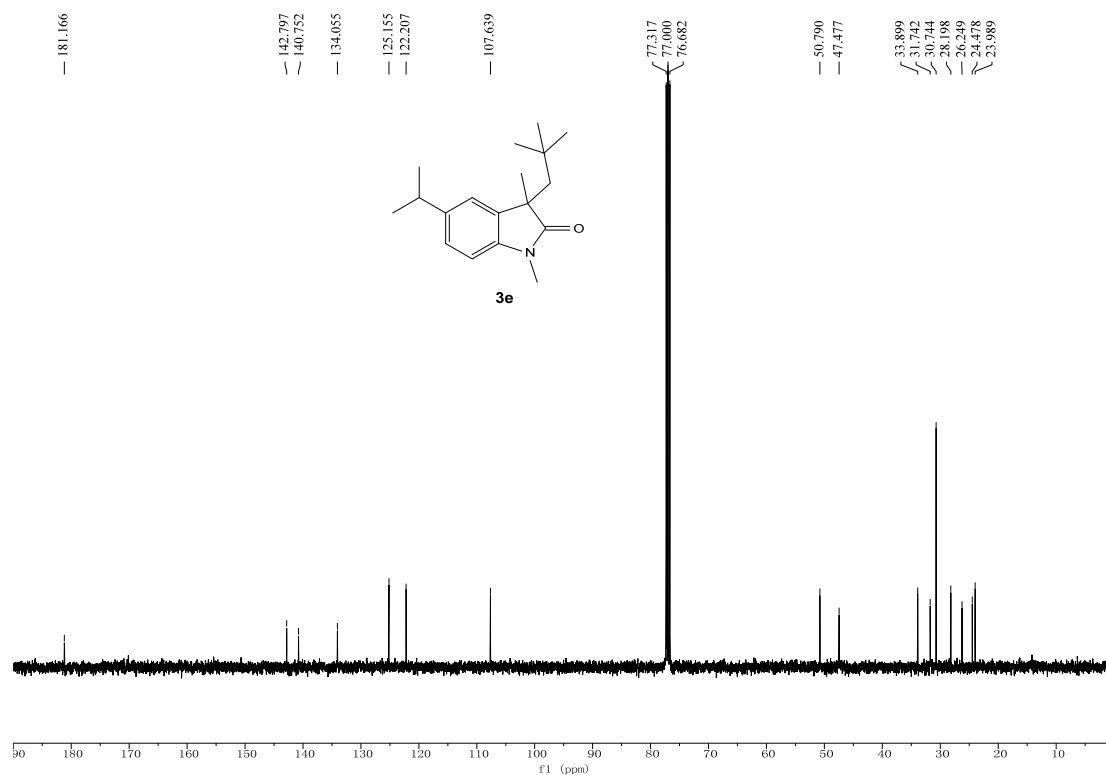

# <sup>1</sup>H and <sup>13</sup>C NMR spectra of 3f

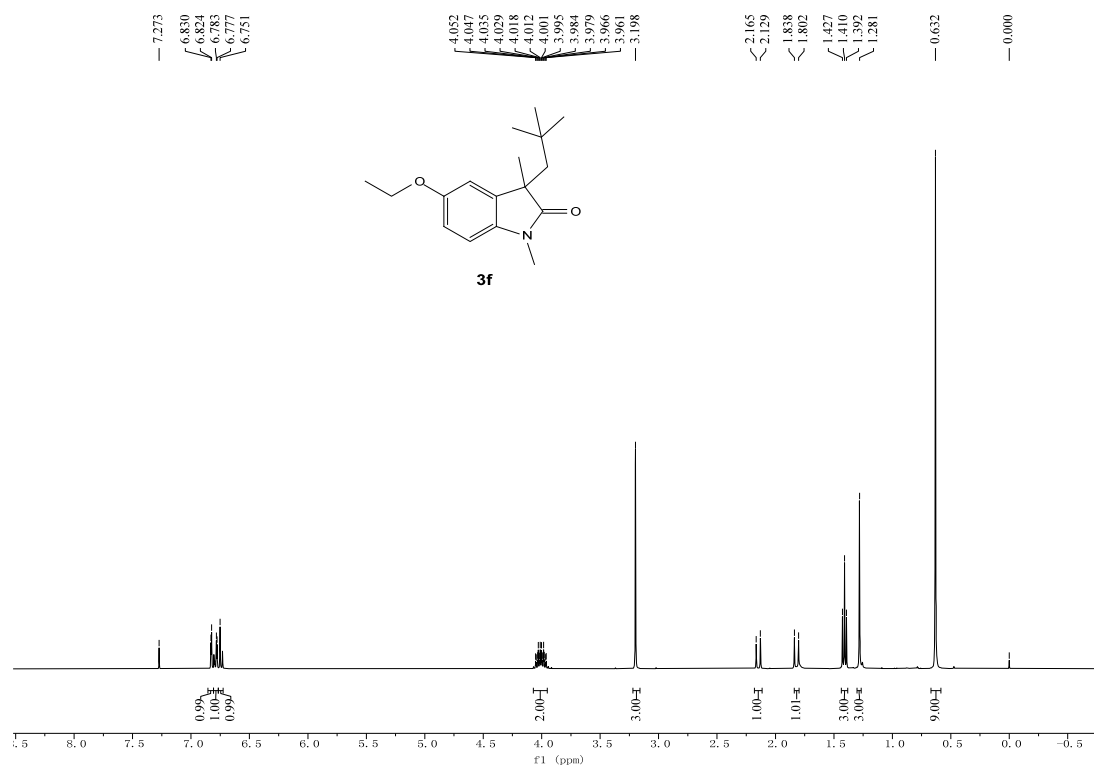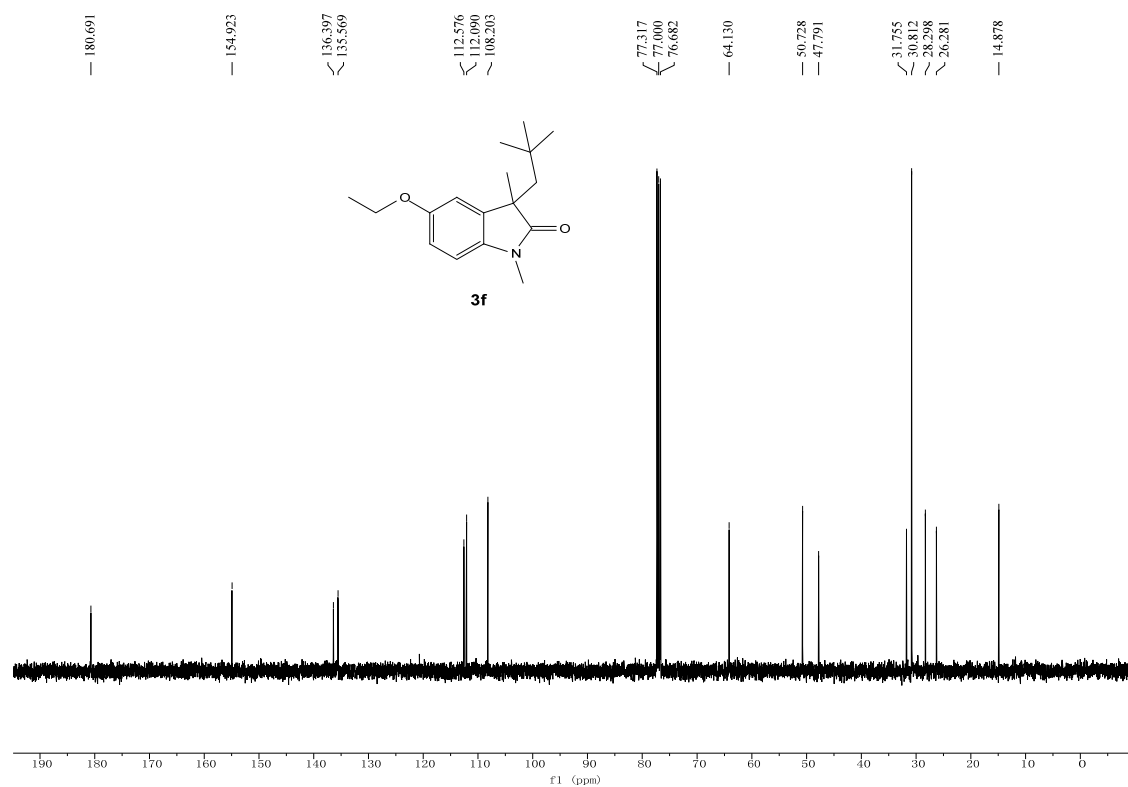

# <sup>1</sup>H and <sup>13</sup>C NMR spectra of 3g

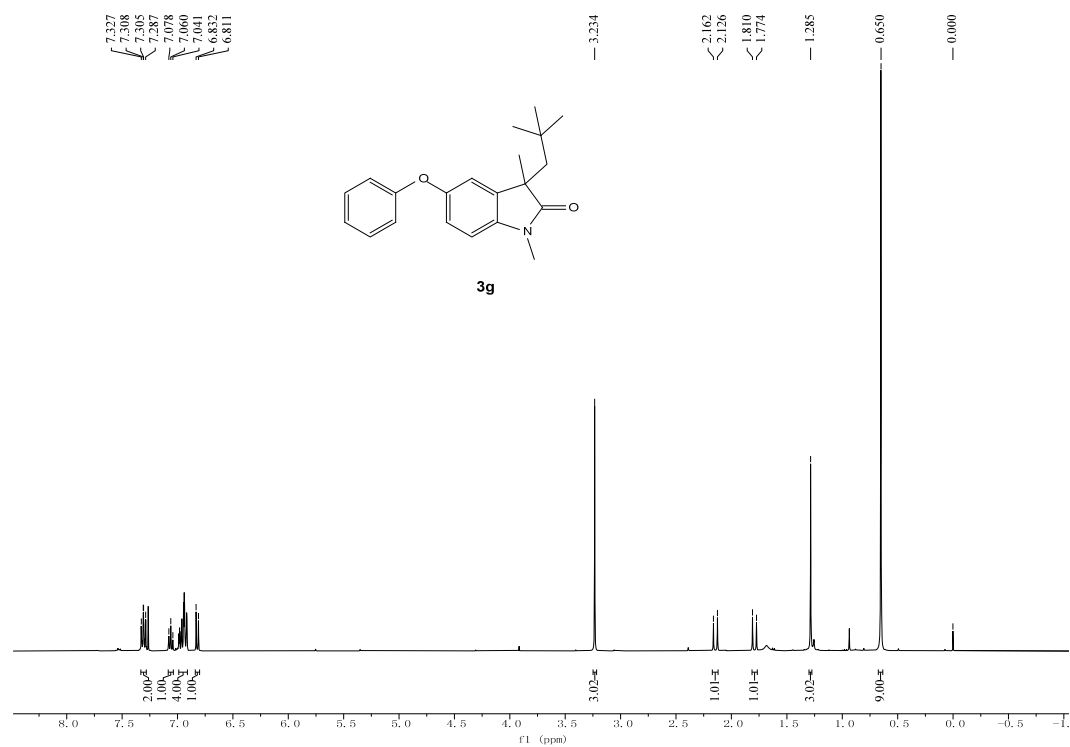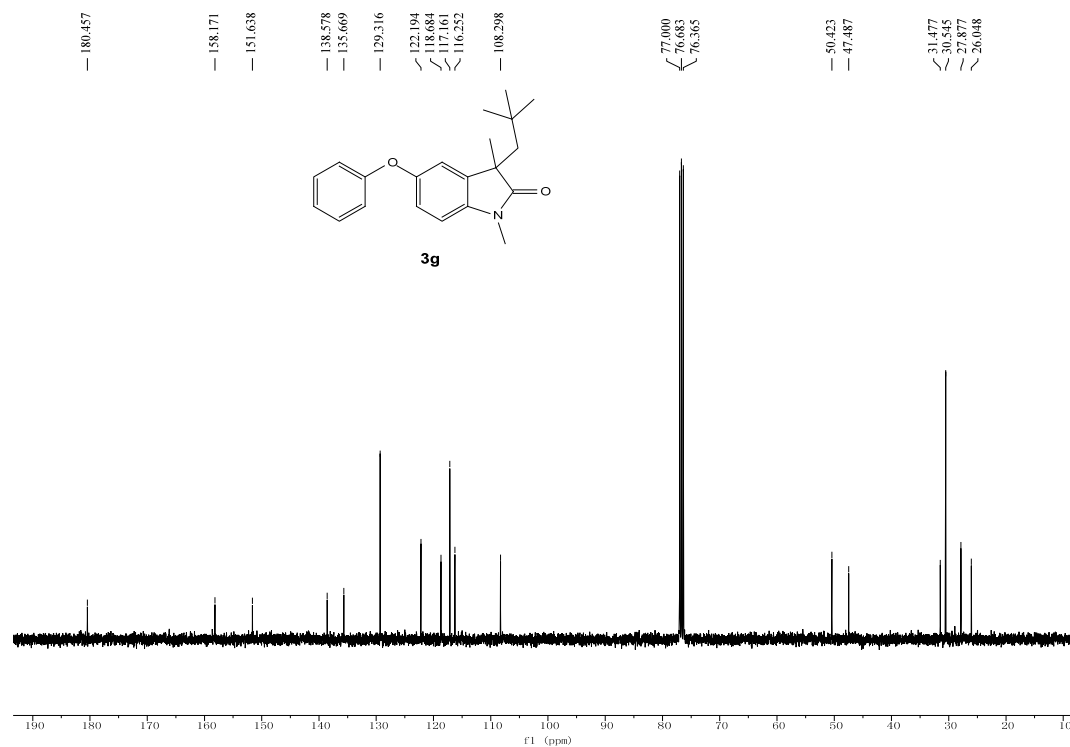

# <sup>1</sup>H, <sup>13</sup>C and <sup>19</sup>F NMR spectra of 3h

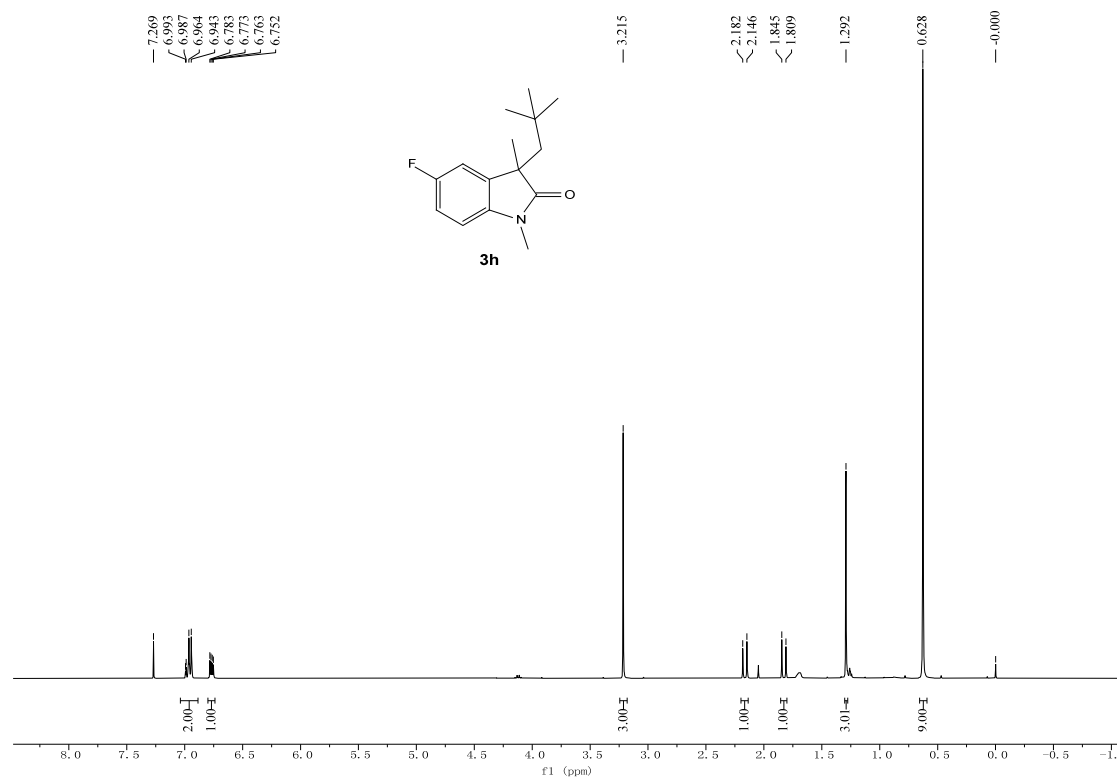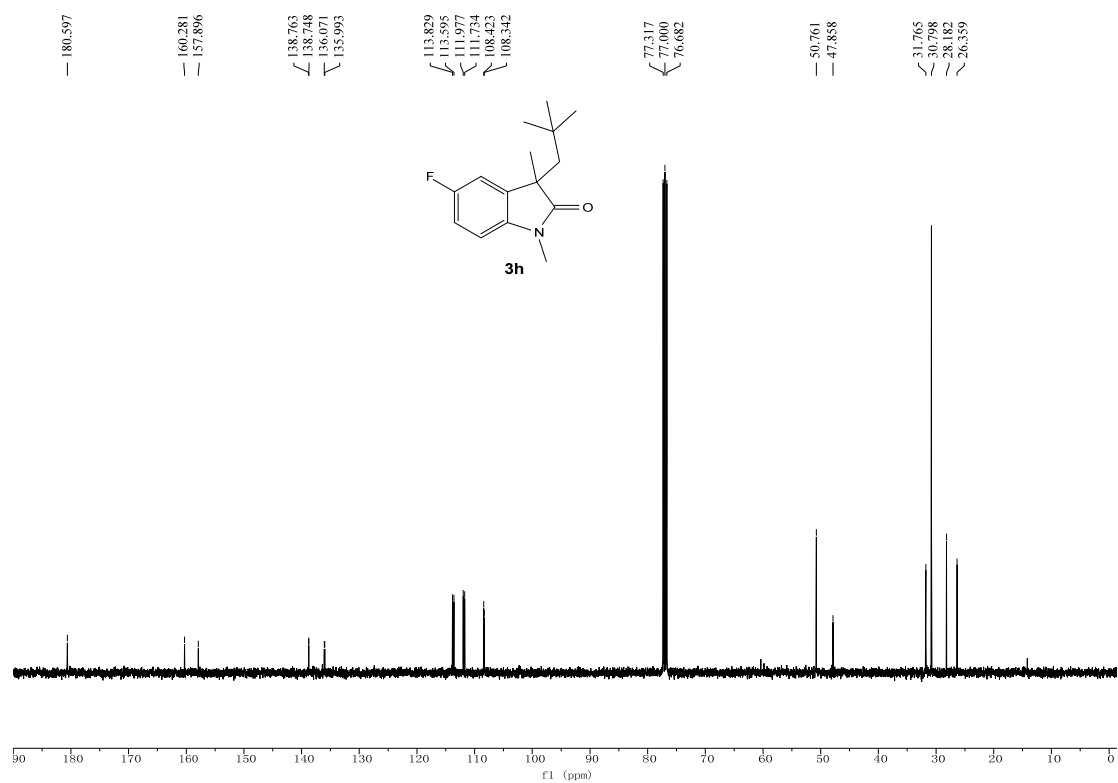

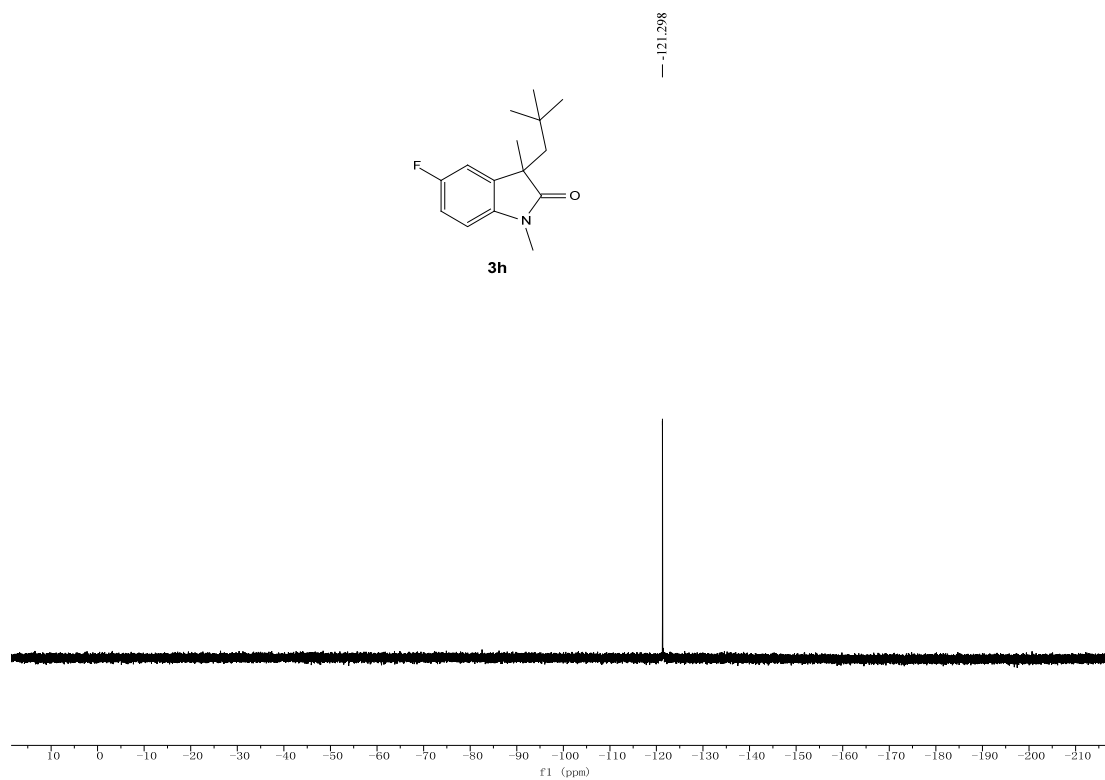

# **$^1\text{H}$ and $^{13}\text{C}$ NMR spectra of 3i**

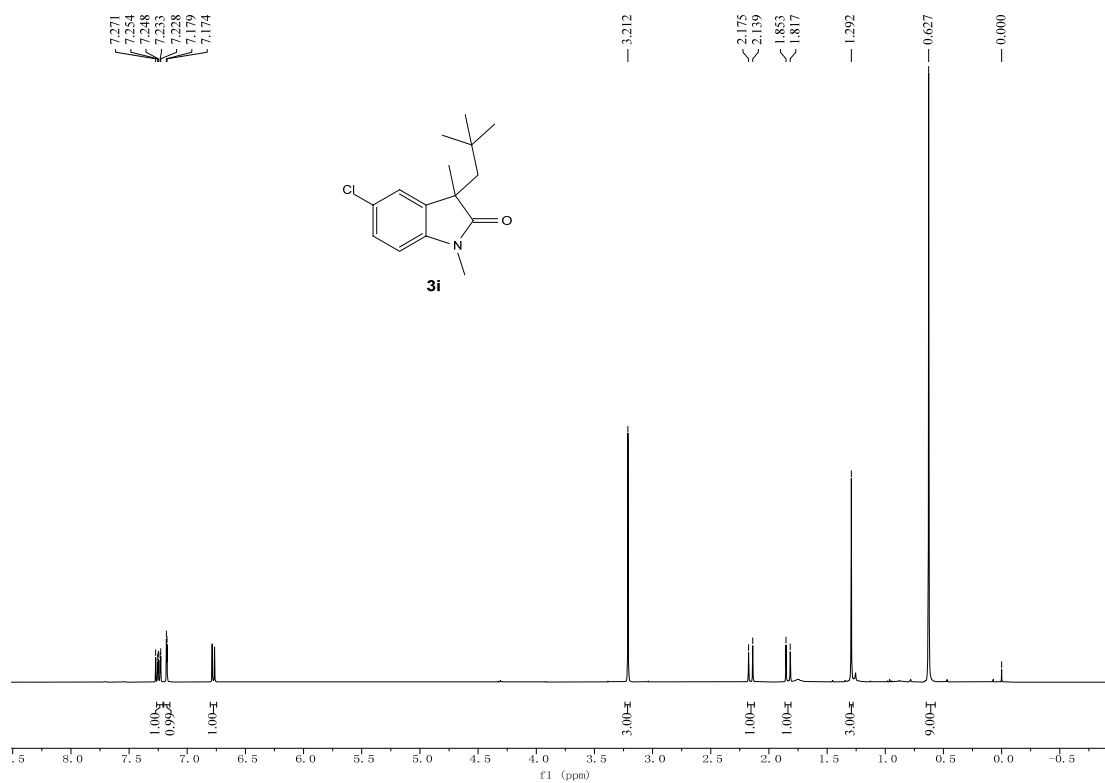

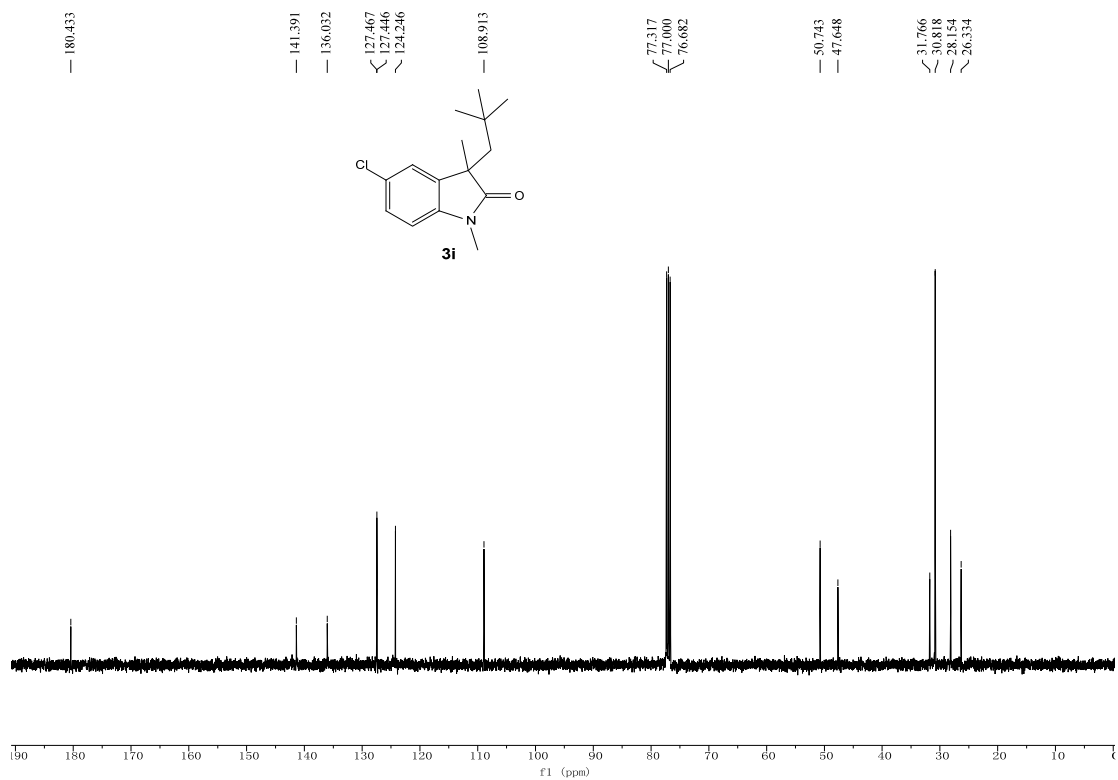

## <sup>1</sup>H and <sup>13</sup>C NMR spectra of 3j

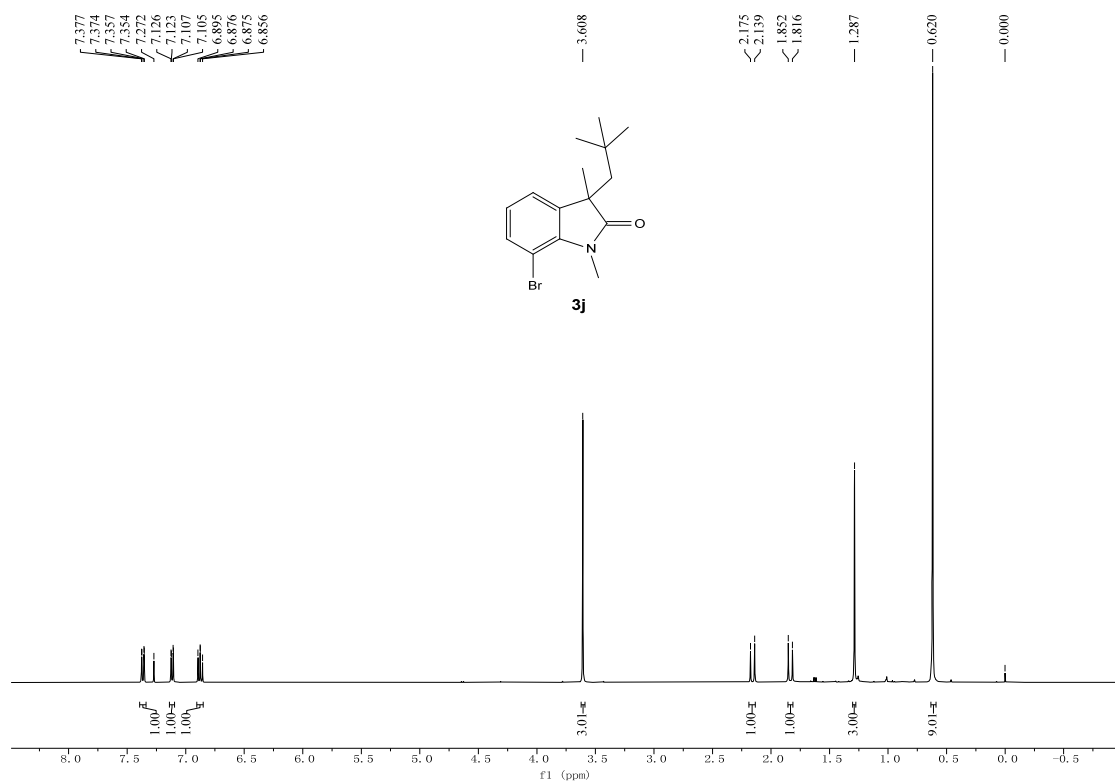

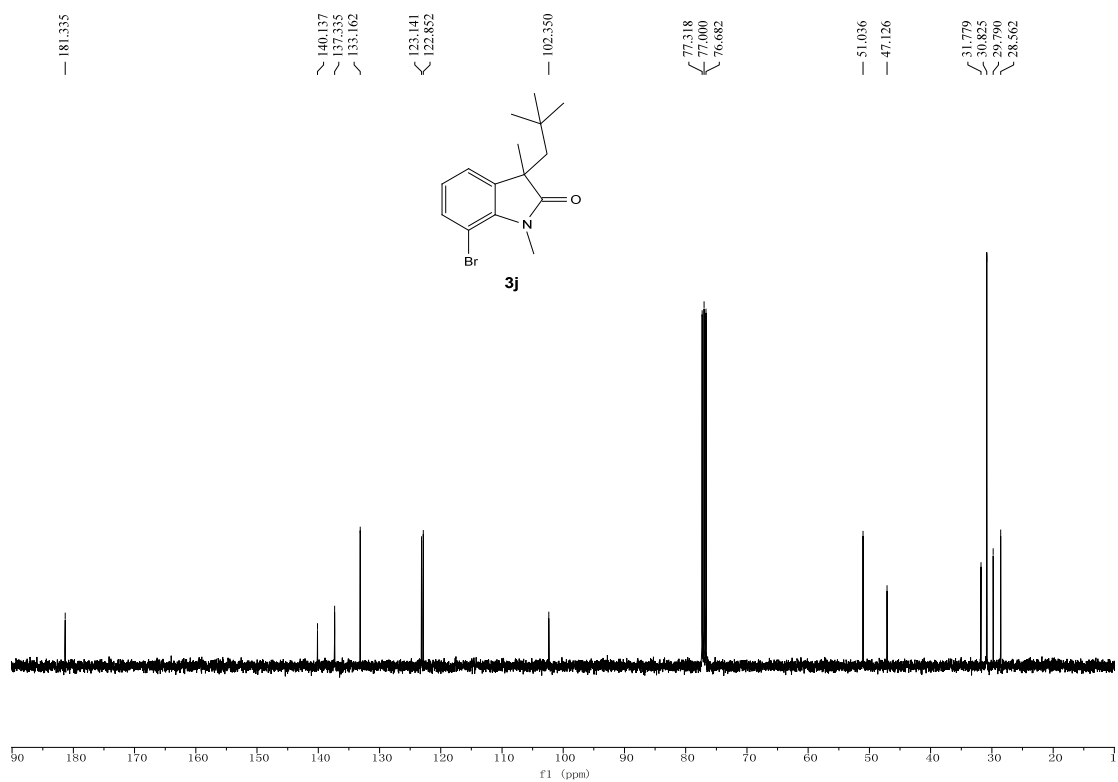

## <sup>1</sup>H and <sup>13</sup>C NMR spectra of 3k

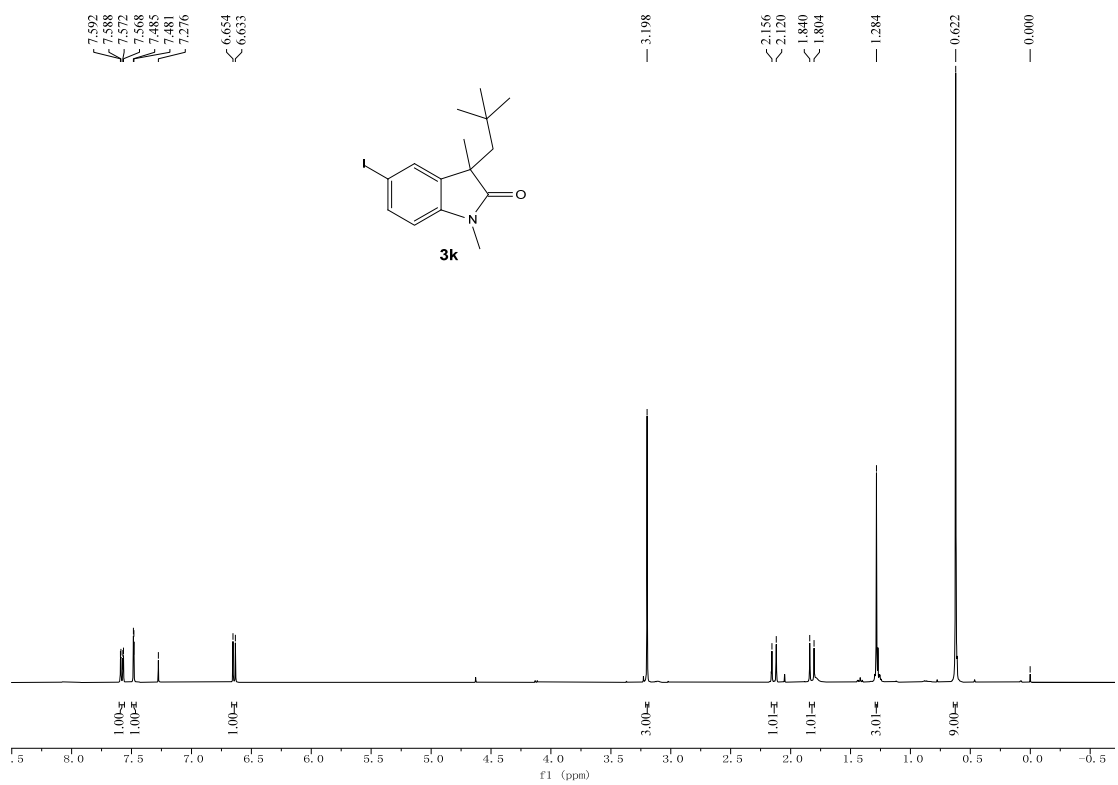

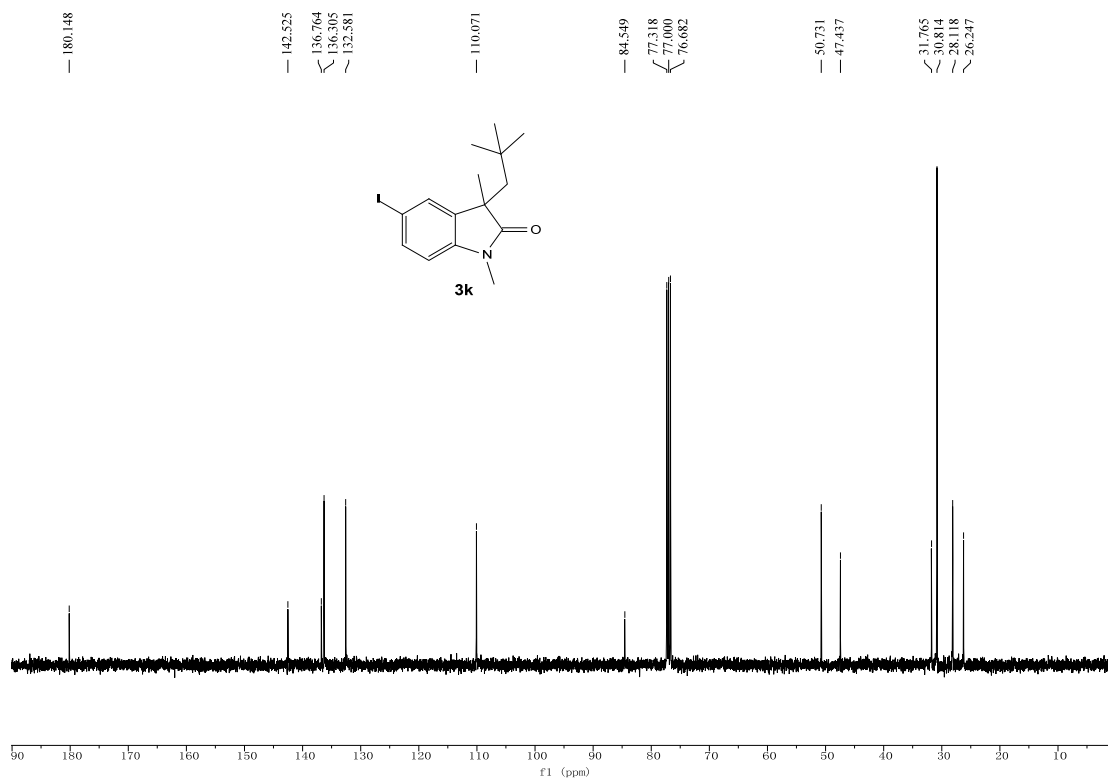

## <sup>1</sup>H and <sup>13</sup>C NMR spectra of 3l

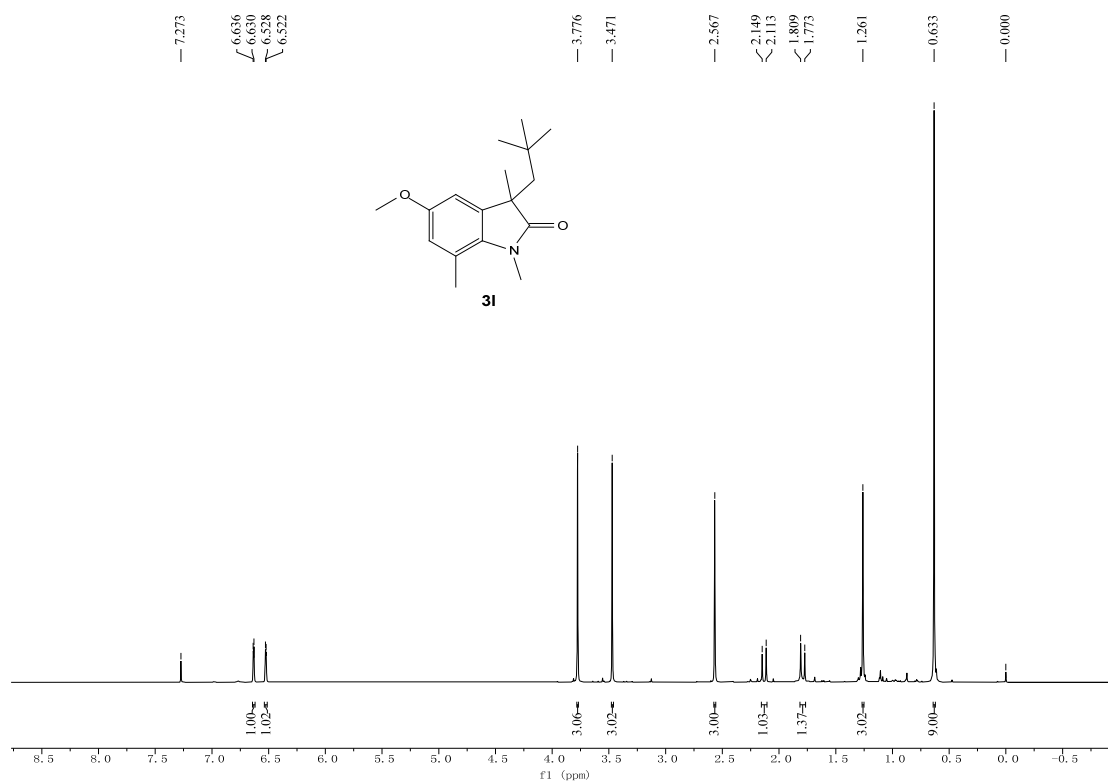

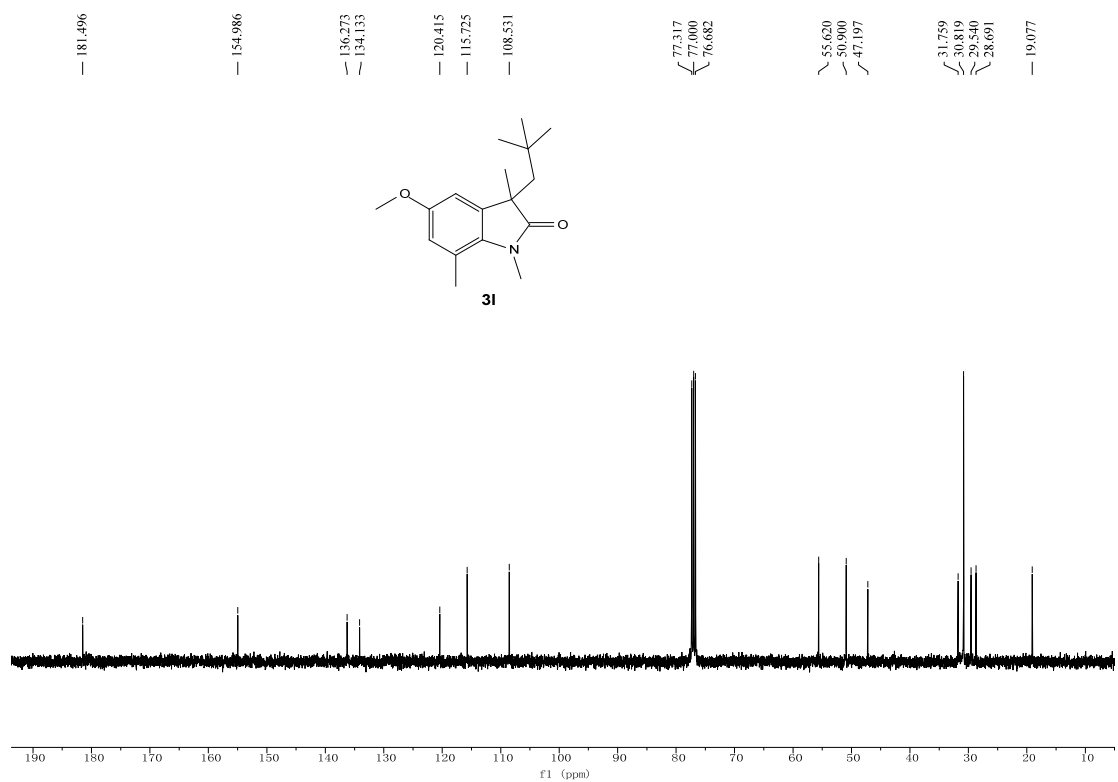

# <sup>1</sup>H and <sup>13</sup>C NMR spectra of **3m**

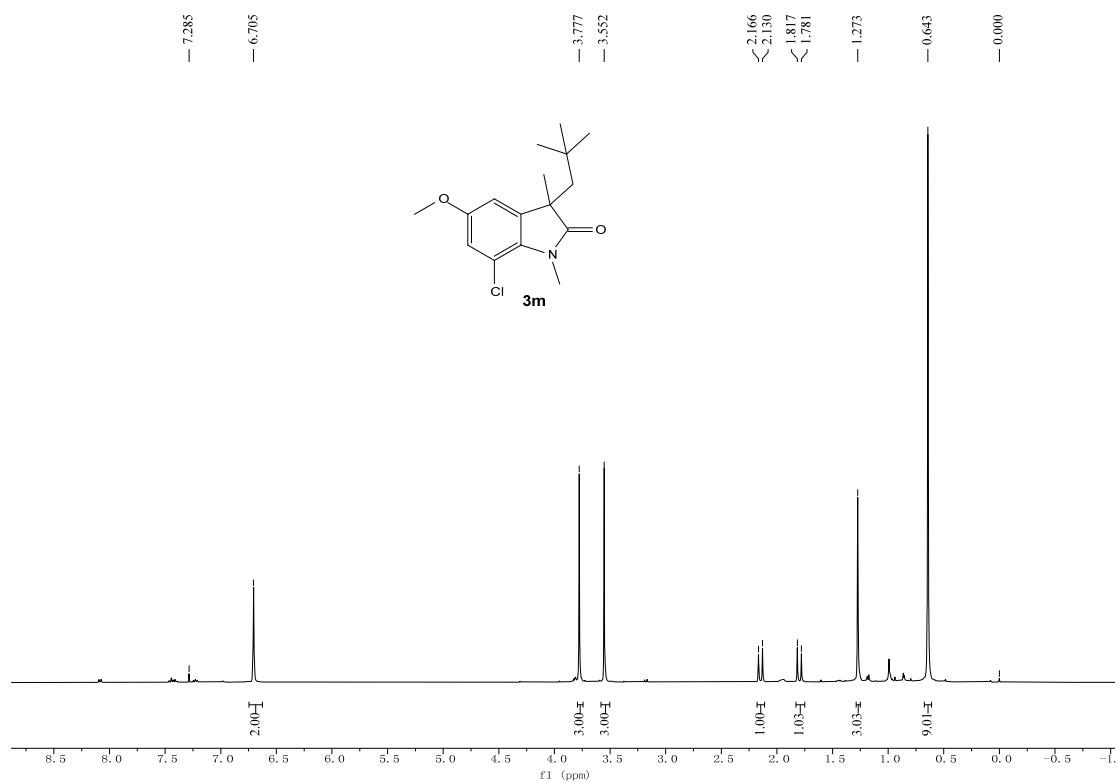

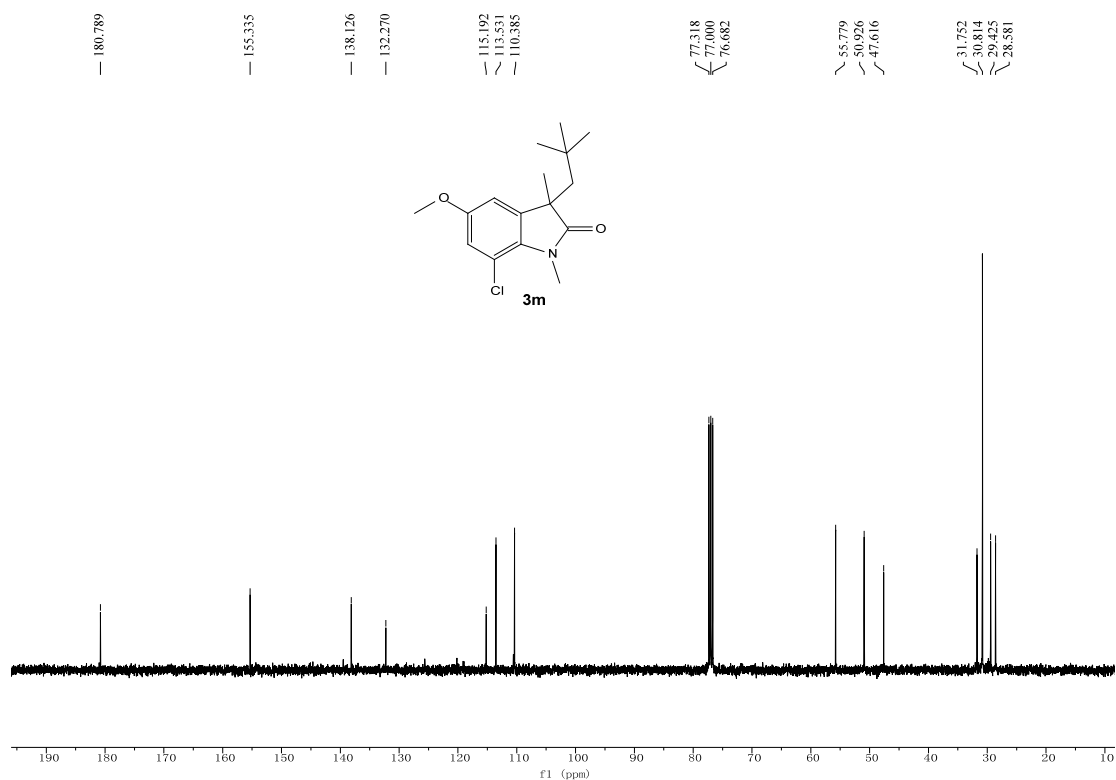

## <sup>1</sup>H and <sup>13</sup>C NMR spectra of 3n

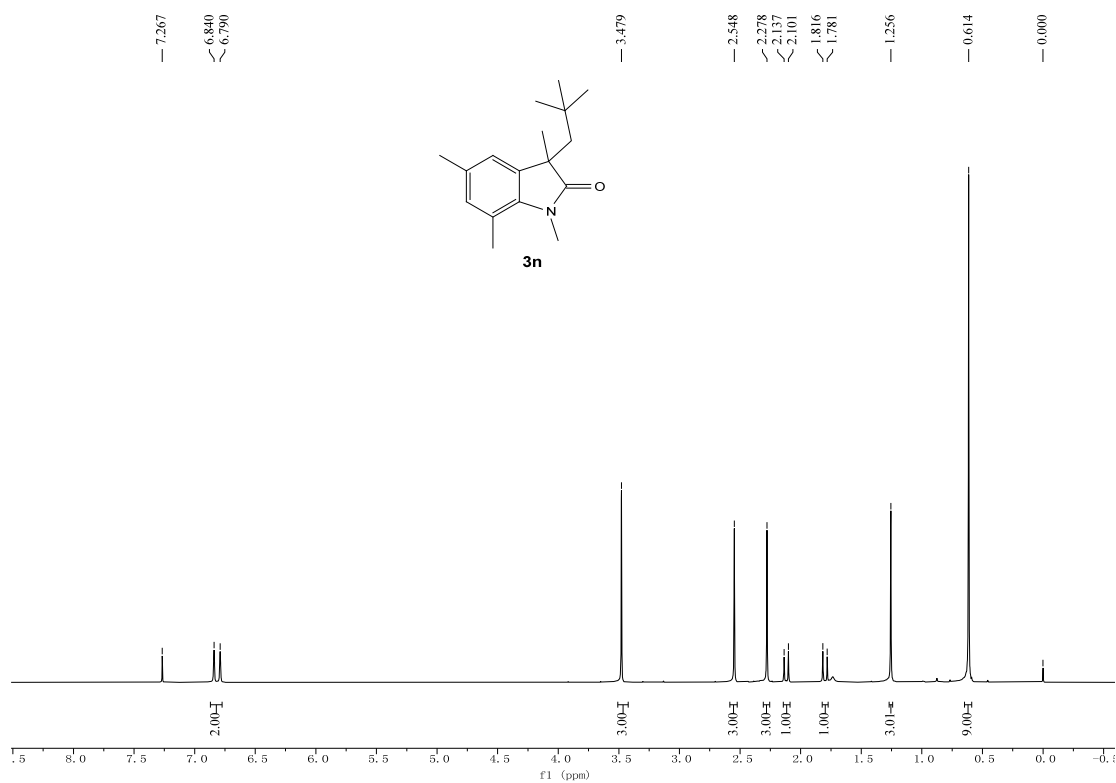

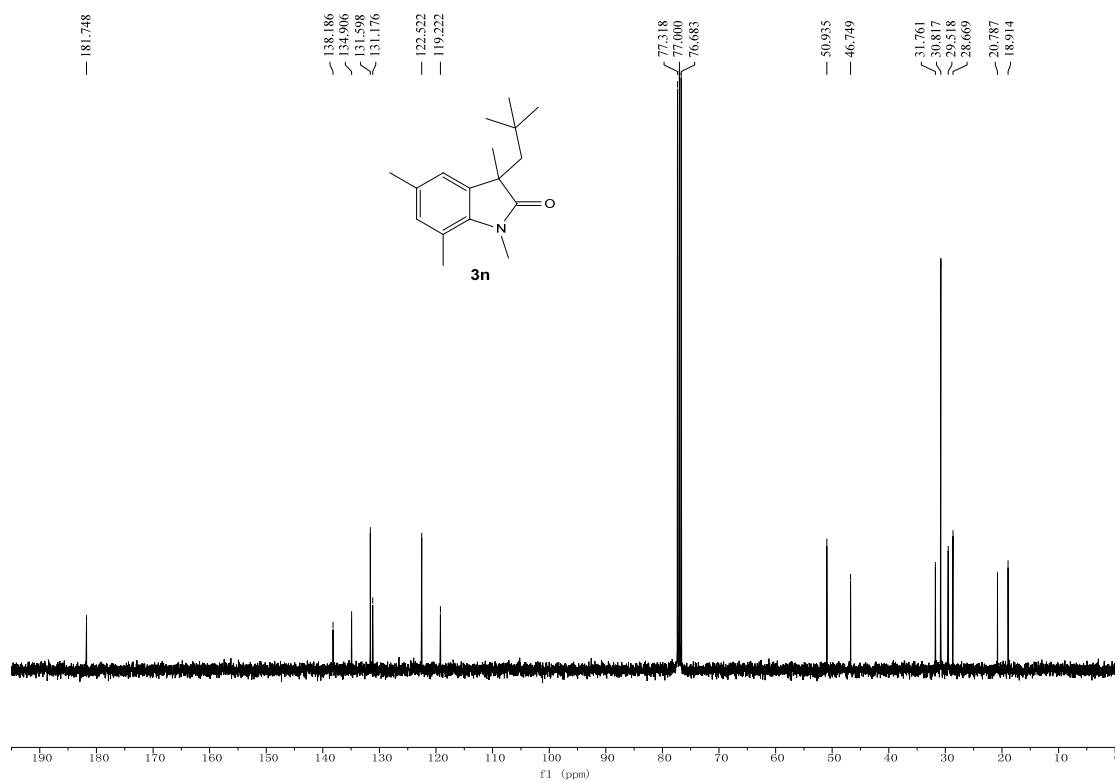

## <sup>1</sup>H and <sup>13</sup>C NMR spectra of 3o

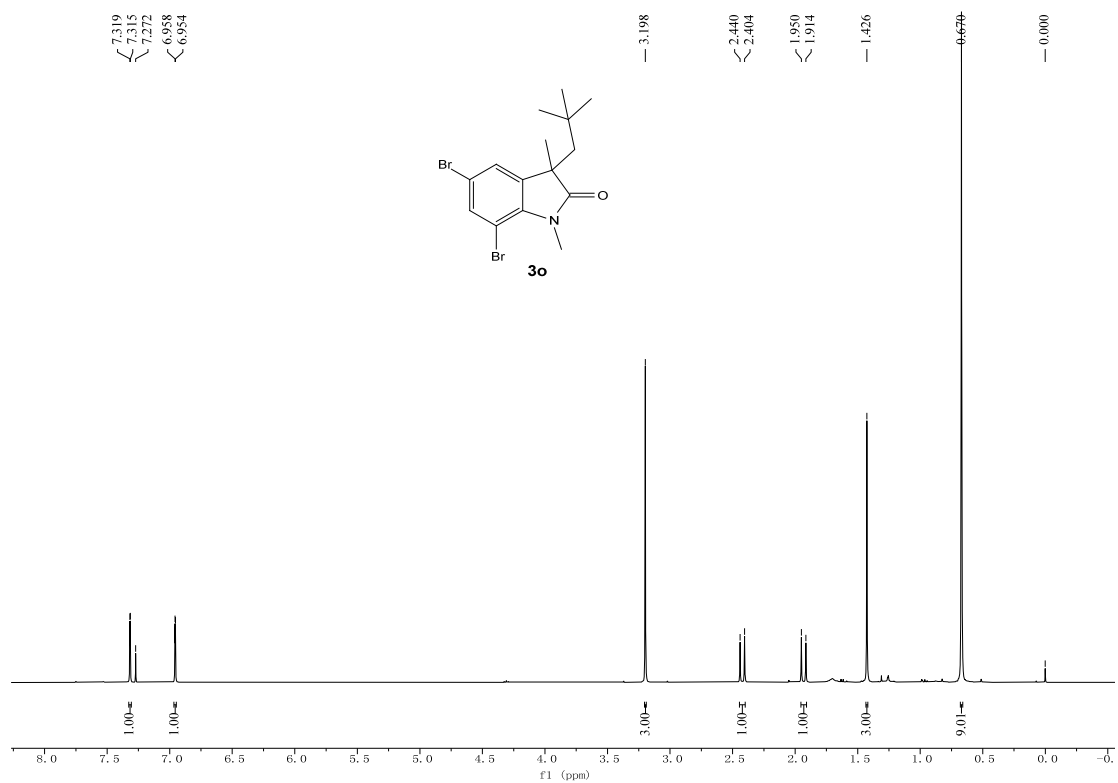

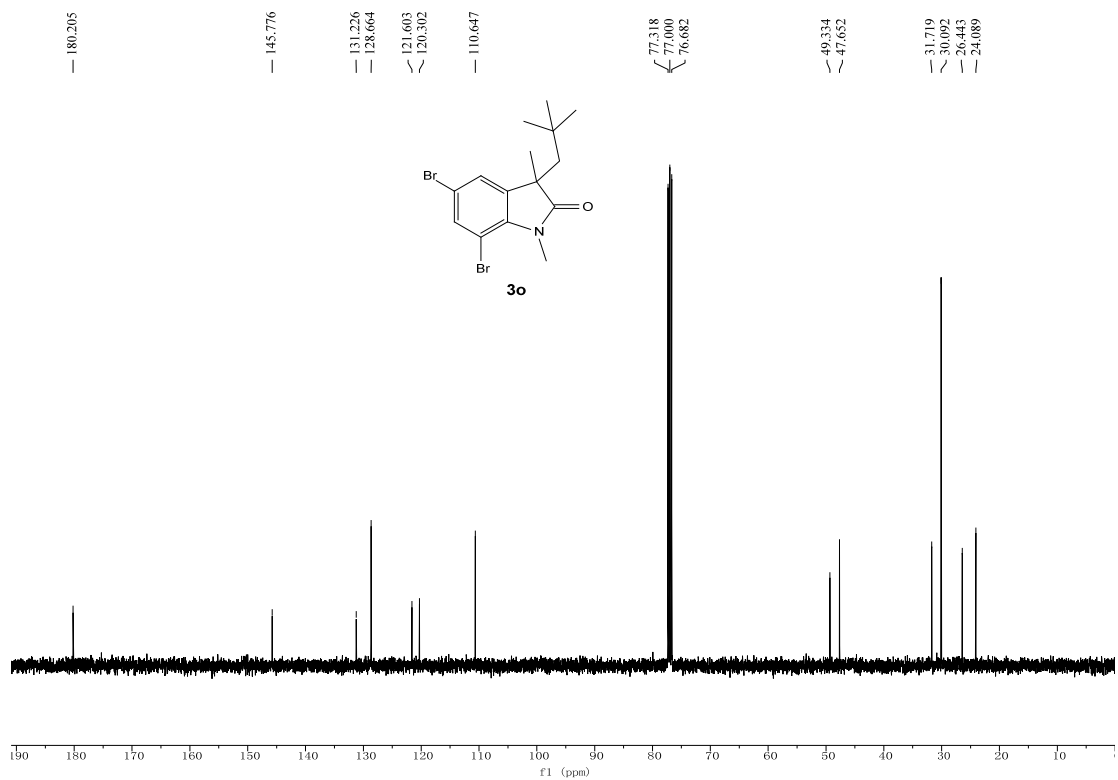

## <sup>1</sup>H and <sup>13</sup>C NMR spectra of 3p

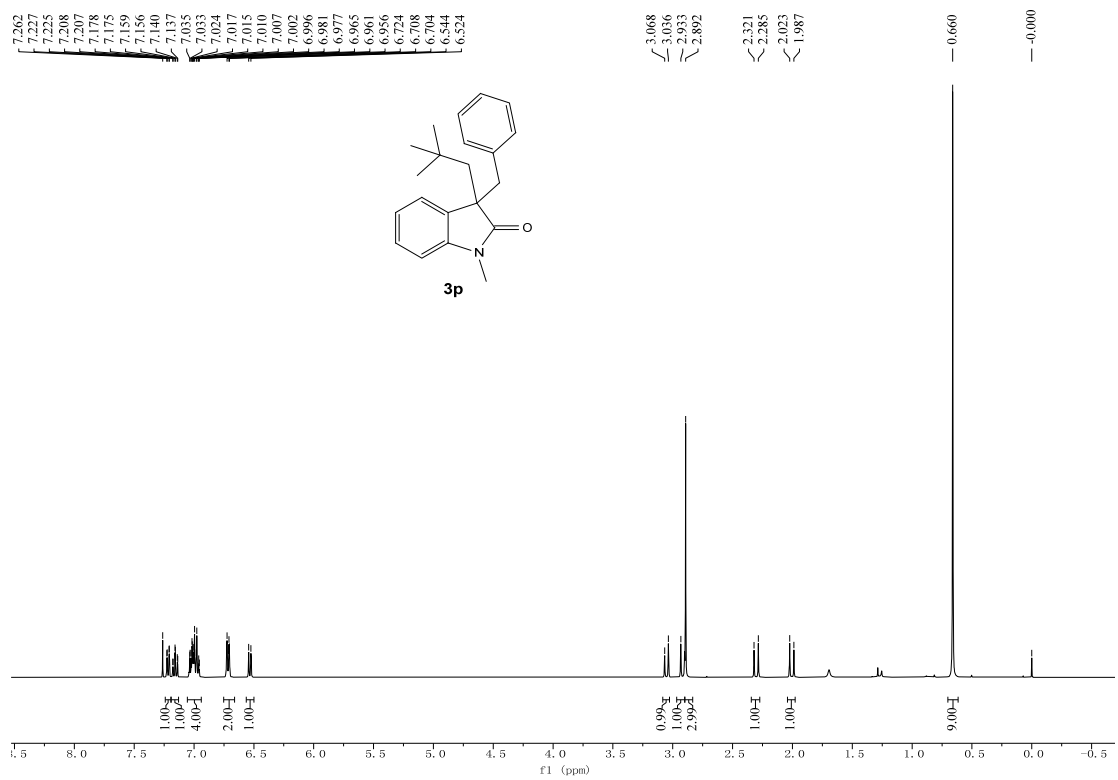

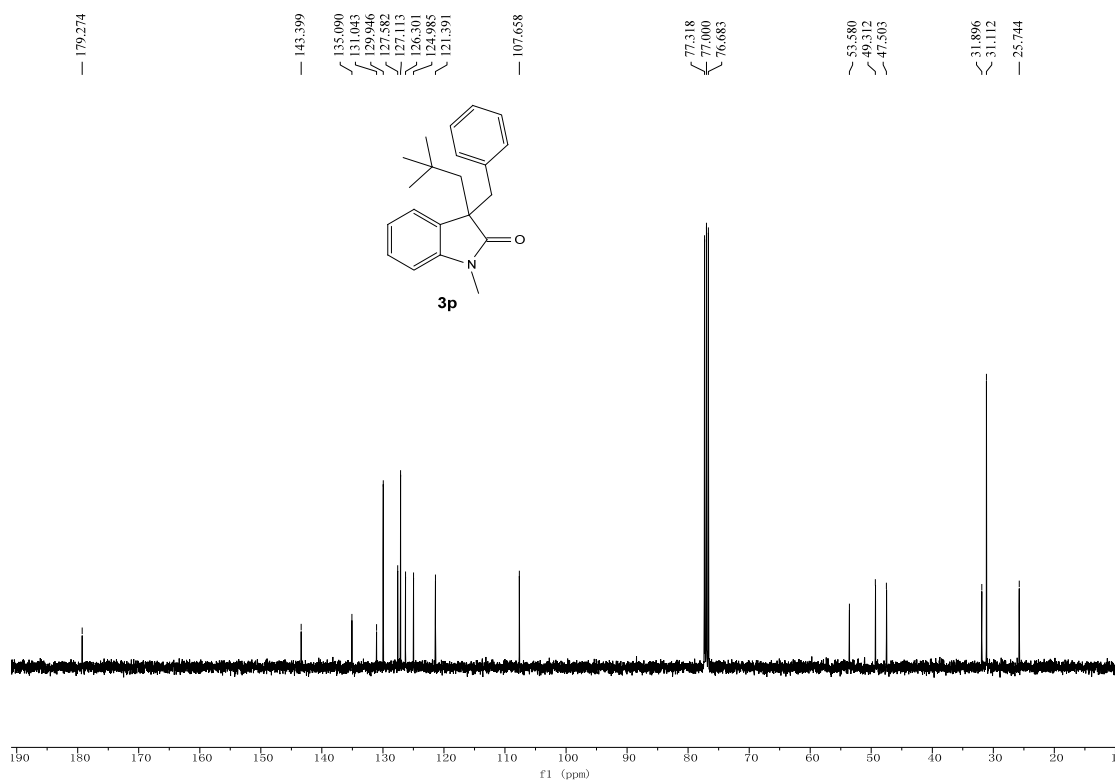

## <sup>1</sup>H and <sup>13</sup>C NMR spectra of 3q

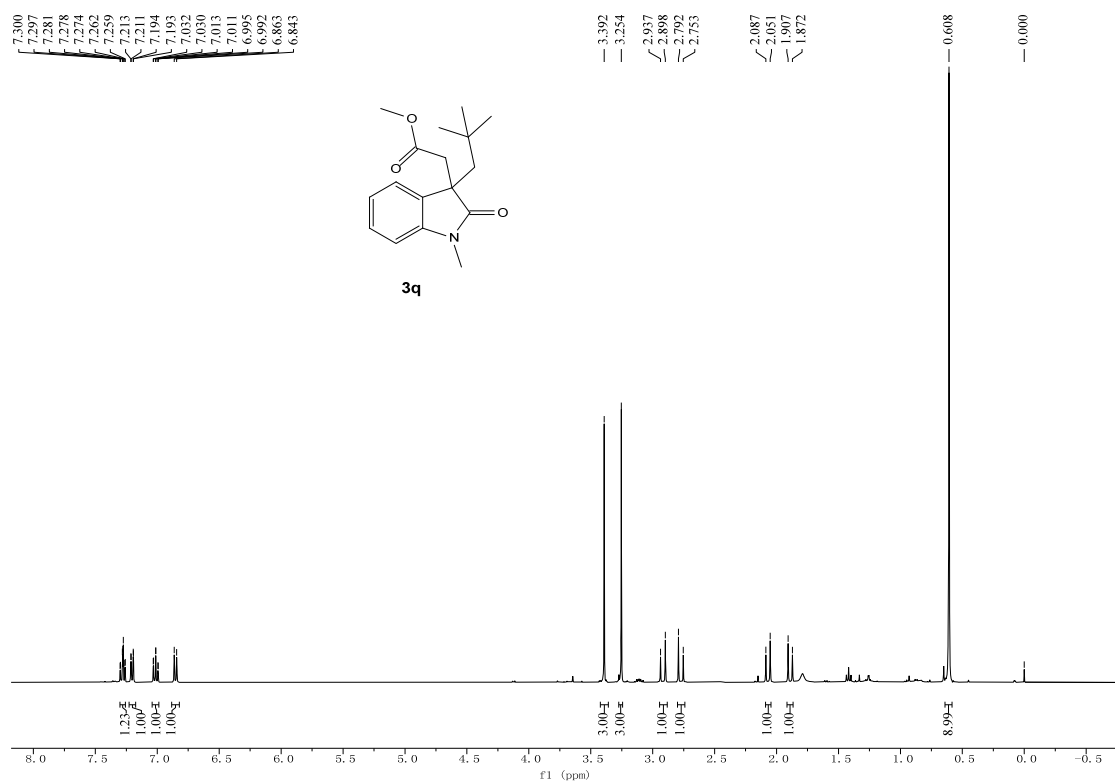

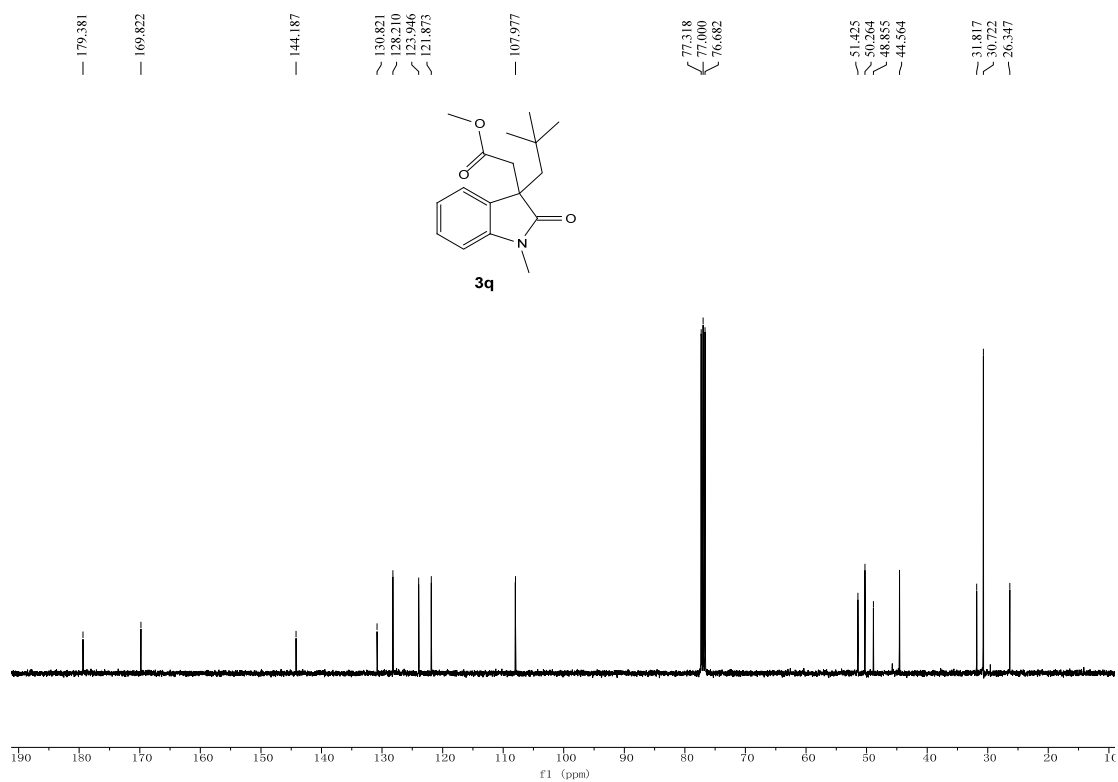

# <sup>1</sup>H and <sup>13</sup>C NMR spectra of **3r**

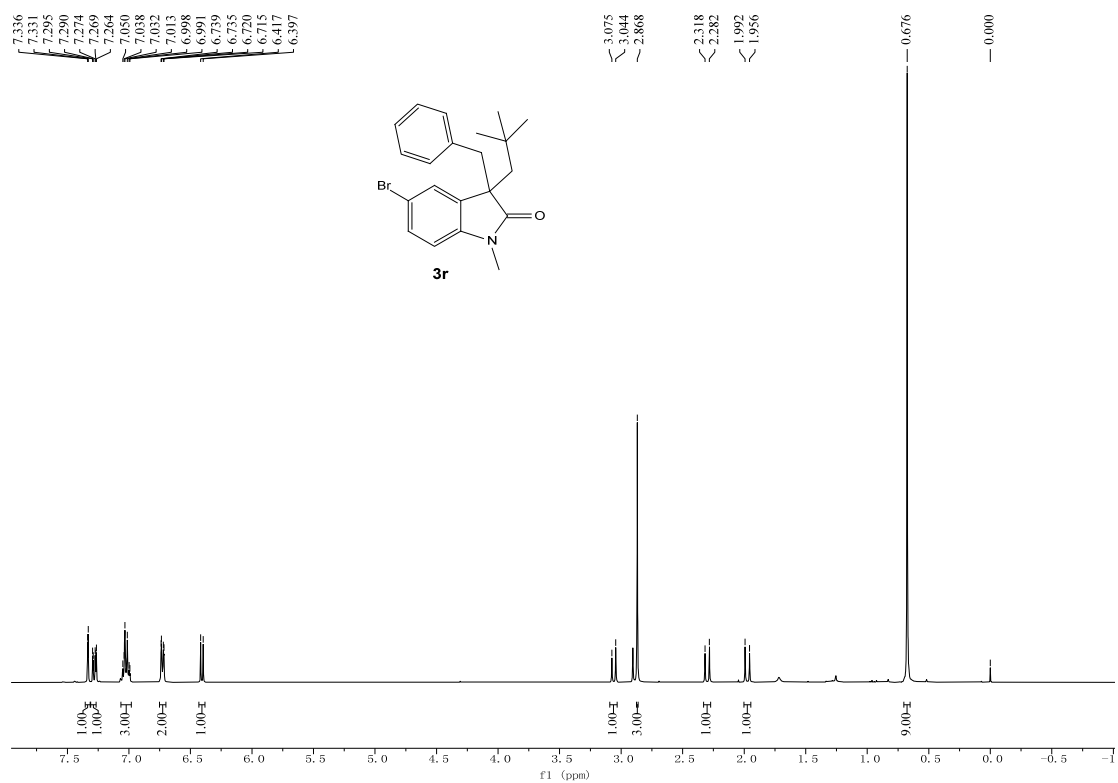

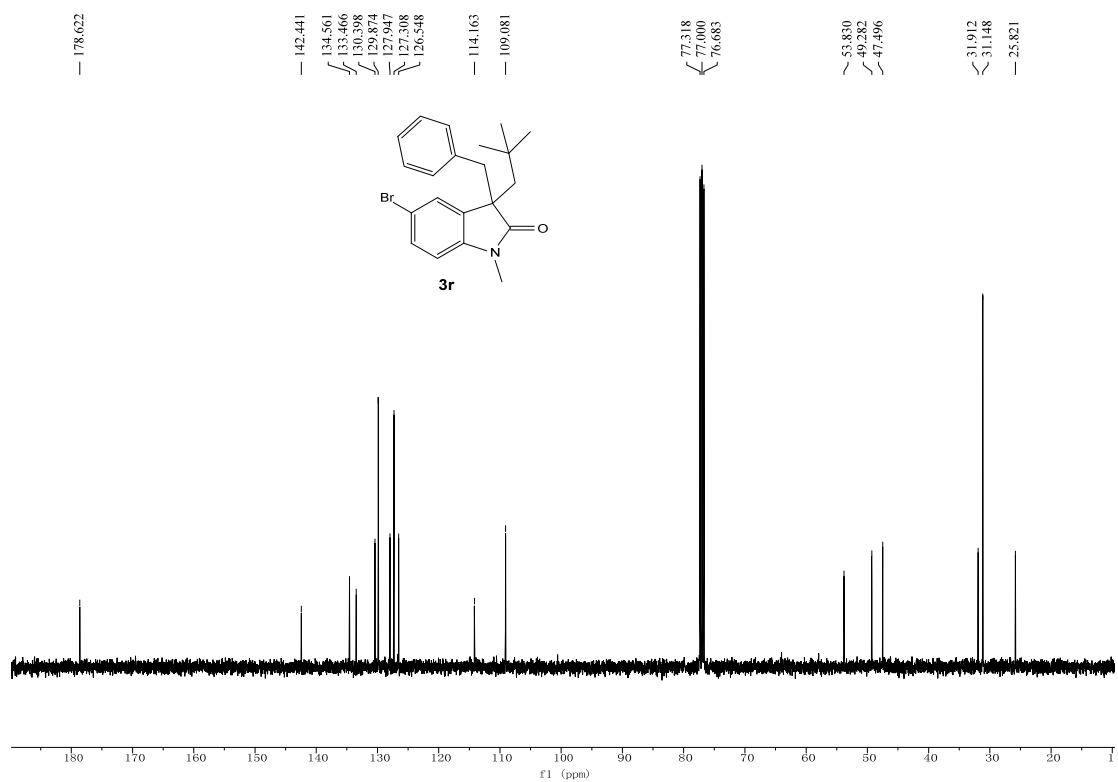

## <sup>1</sup>H and <sup>13</sup>C NMR spectra of **3s**

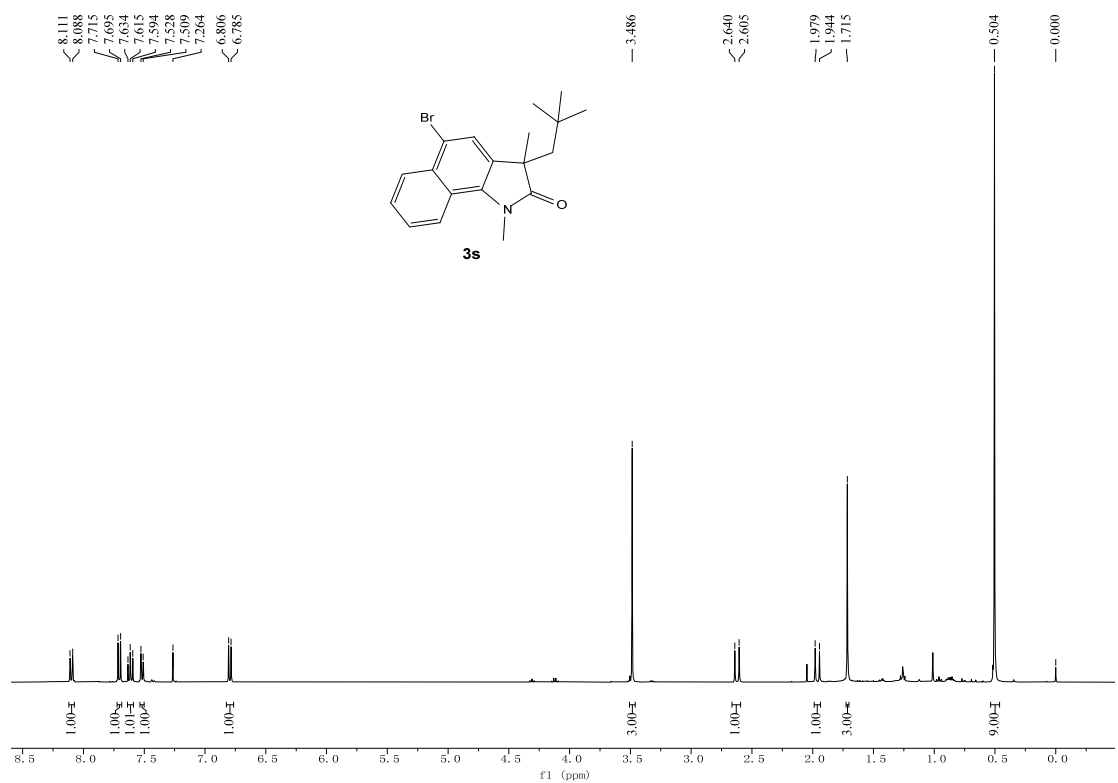

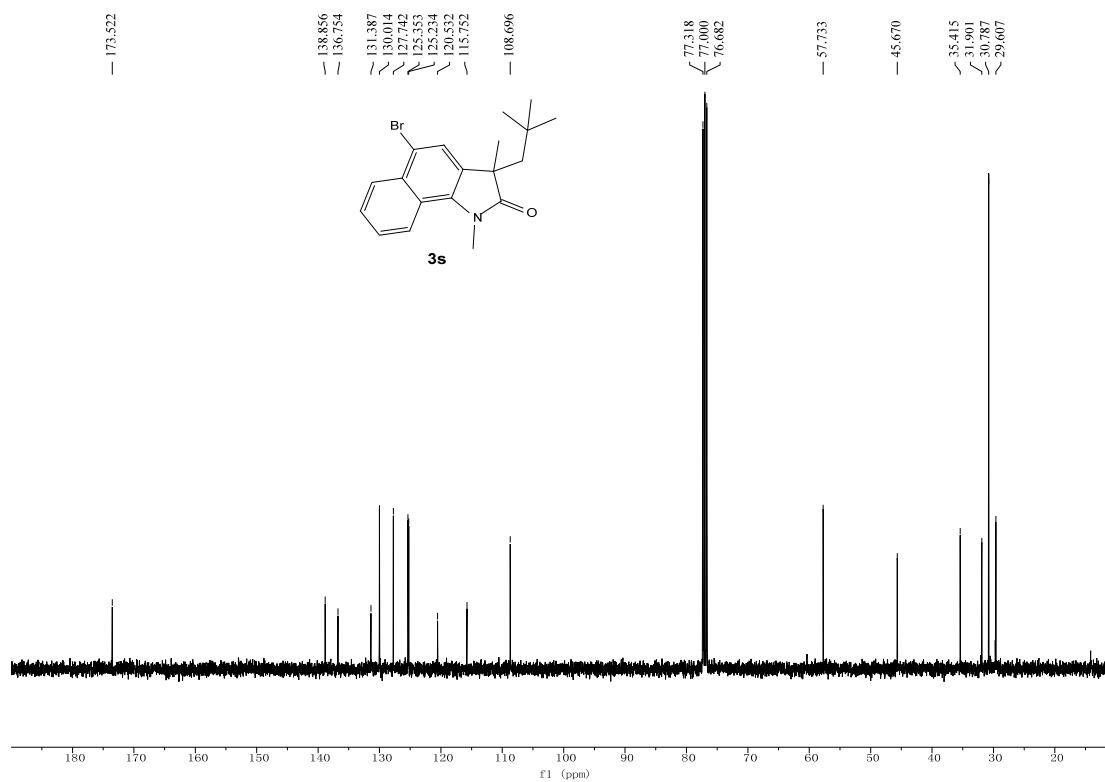

# **<sup>1</sup>H and <sup>13</sup>C NMR spectra of 3t**

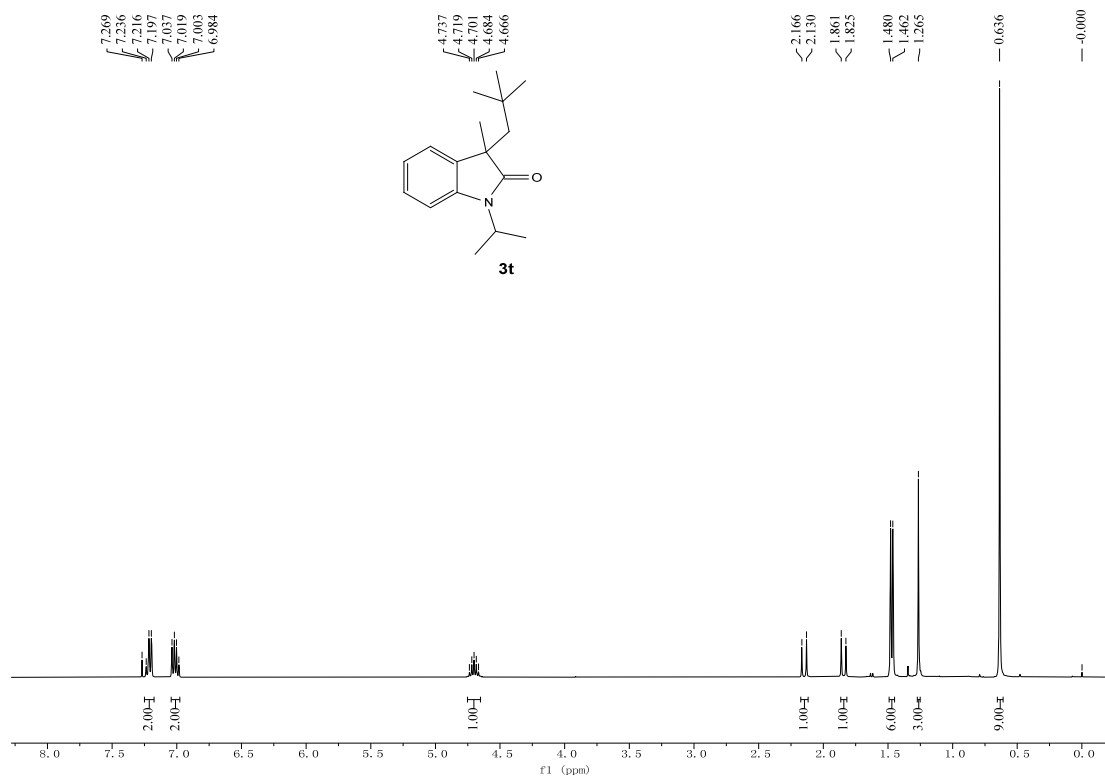

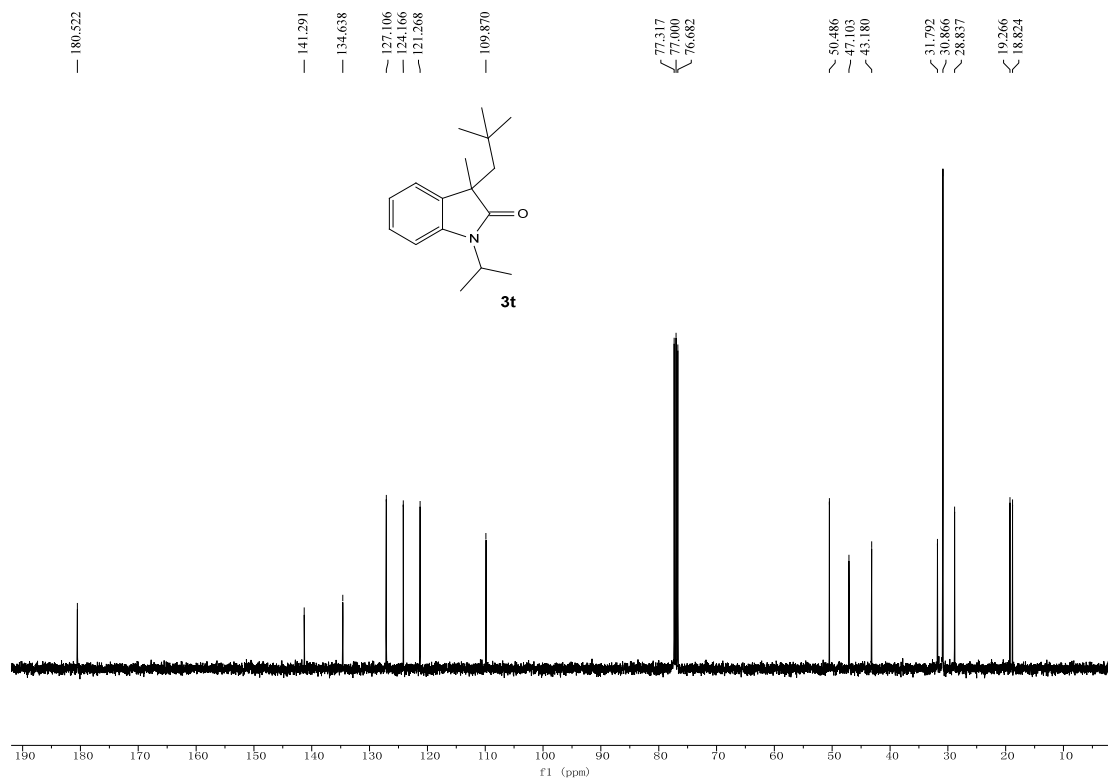

## <sup>1</sup>H and <sup>13</sup>C NMR spectra of 3u

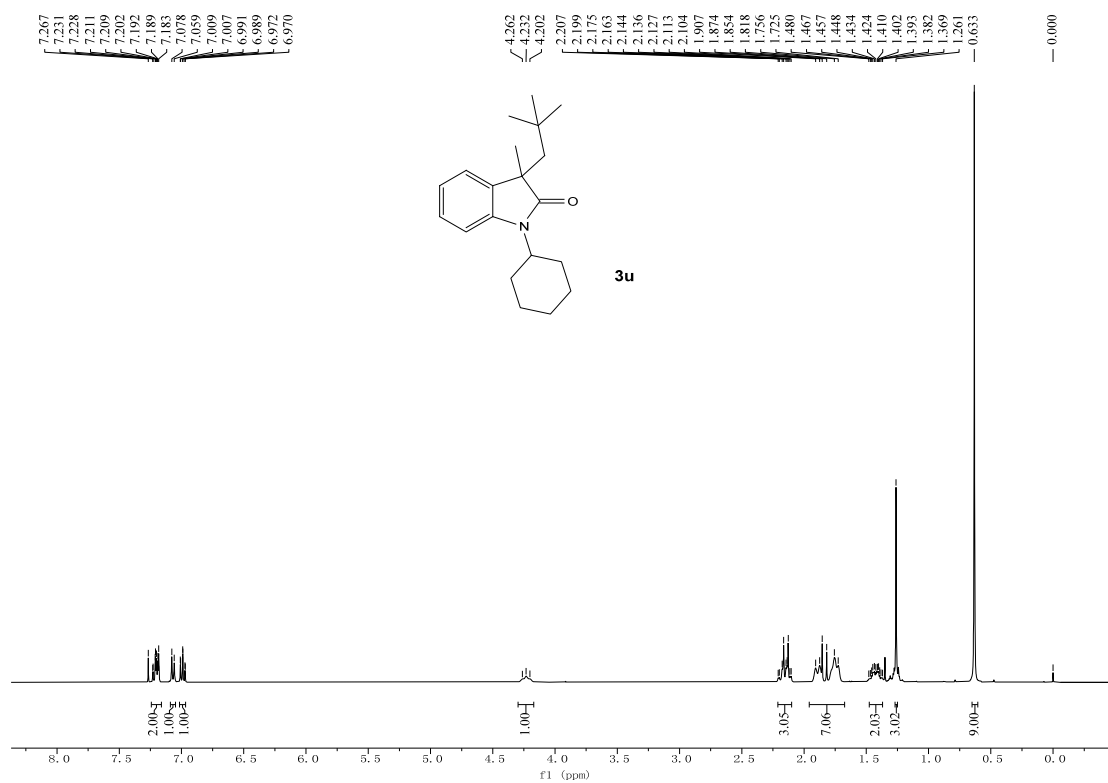

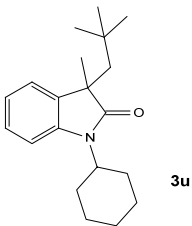

**3v**

Chemical structure of **3v** is shown above the spectrum.

<sup>1</sup>H NMR spectrum (CDCl<sub>3</sub>) of compound **3v**. The x-axis represents the chemical shift in ppm, ranging from 0.0 to 8.0. The spectrum shows several peaks corresponding to the structure of **3v**.

Peak list (ppm):

- 7.327, 7.307, 7.287, 7.269, 7.246, 7.231, 7.207, 7.188, 7.152, 7.133, 7.104, 7.085, 6.985, 6.966, 6.780, 6.760
- 5.073, 5.034, 4.796, 4.757
- 2.235, 2.199, 1.919, 1.883
- 1.343
- 0.641
- 0.000

Integration values are provided below the baseline:

- 6.15
- 1.00
- 1.01
- 1.01
- 1.00
- 1.00
- 1.00
- 1.01
- 3.02
- 9.00

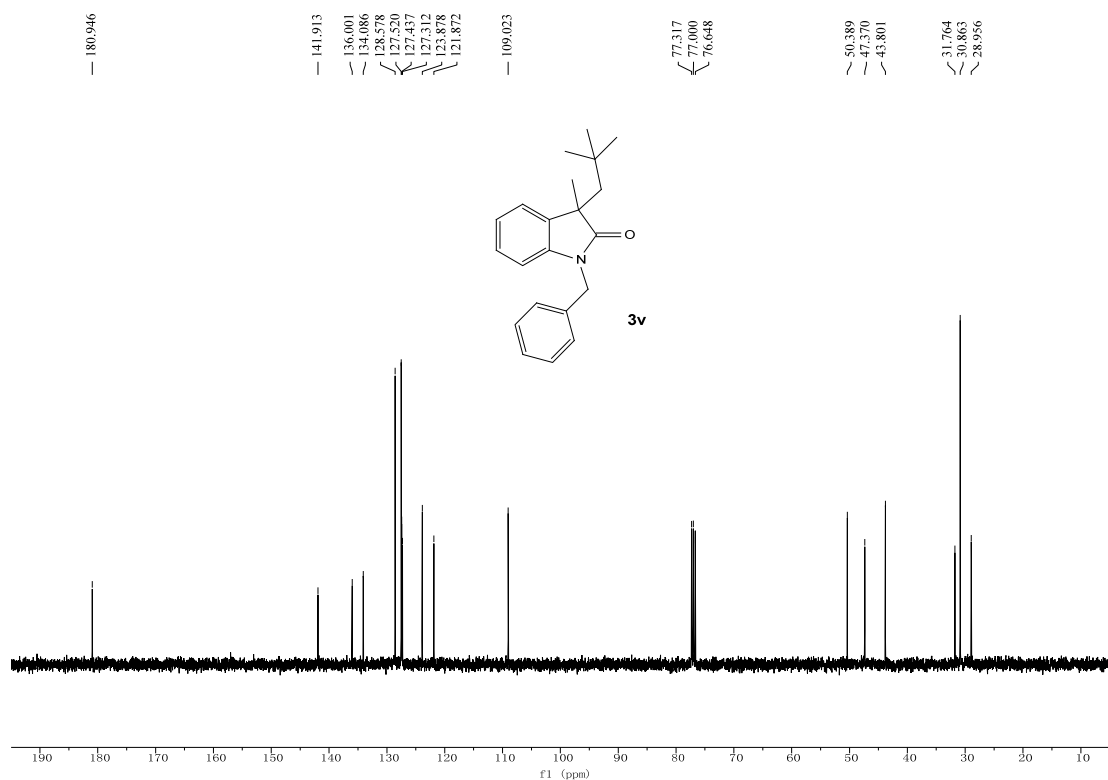

# **<sup>1</sup>H and <sup>13</sup>C NMR spectra of 3aa**

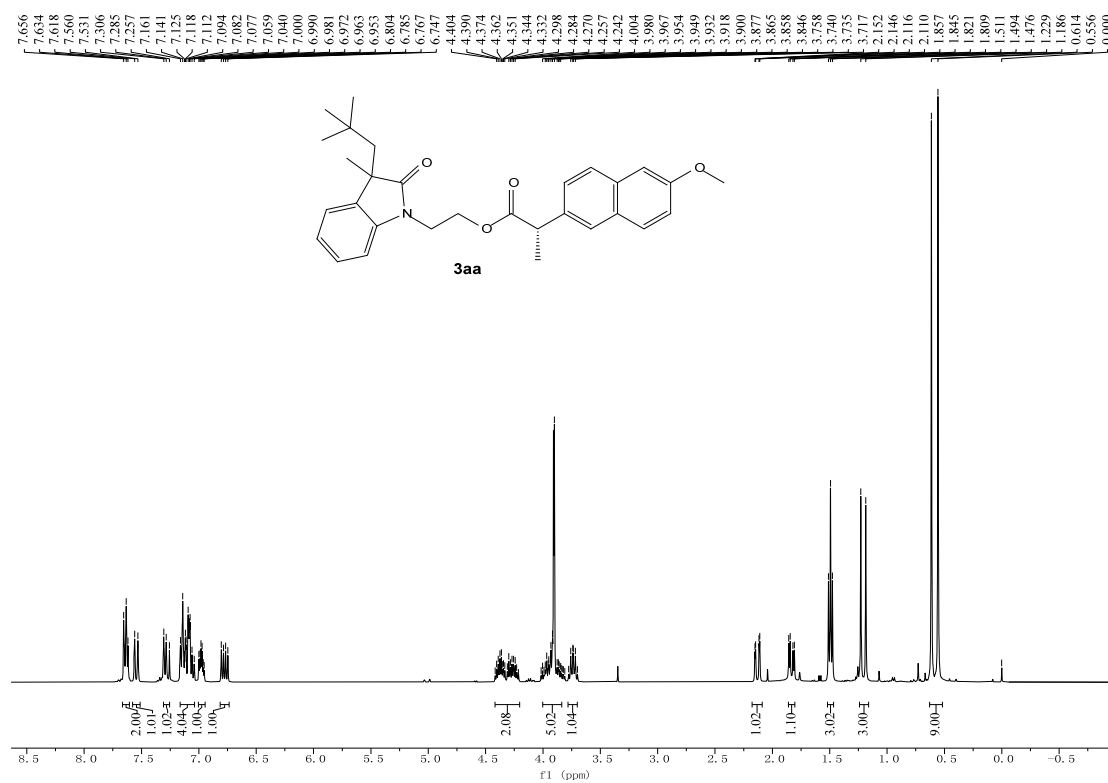

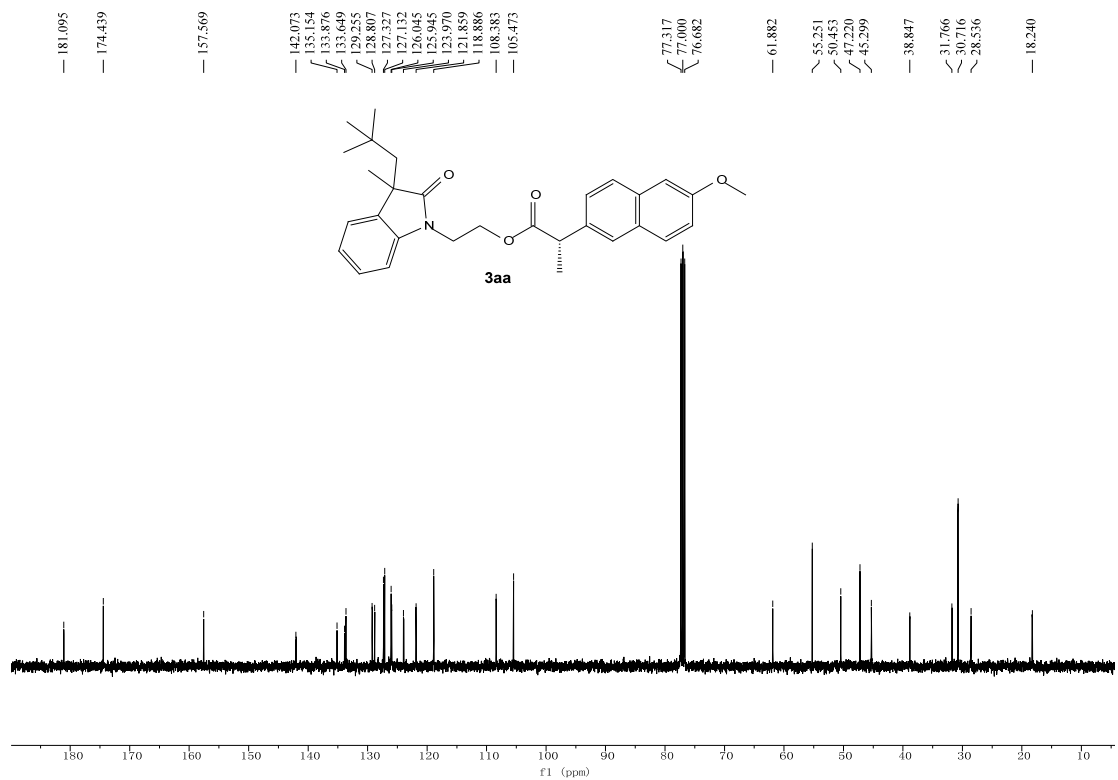

## <sup>1</sup>H and <sup>13</sup>C NMR spectra of 3ba

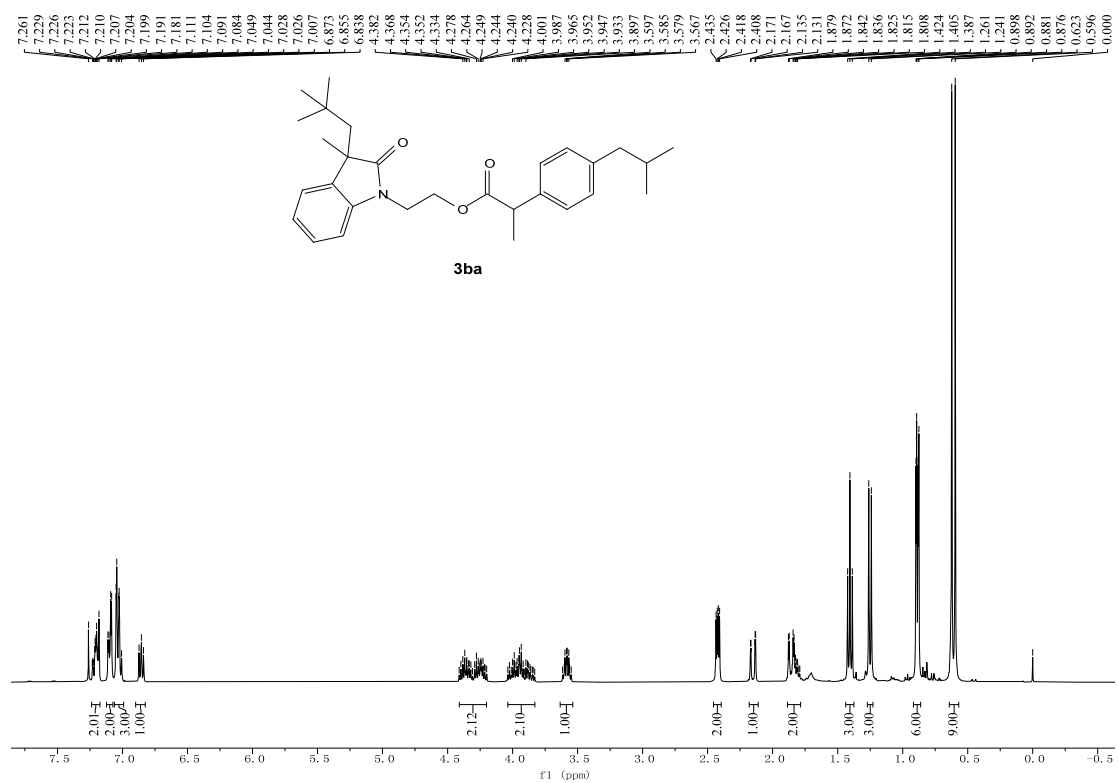

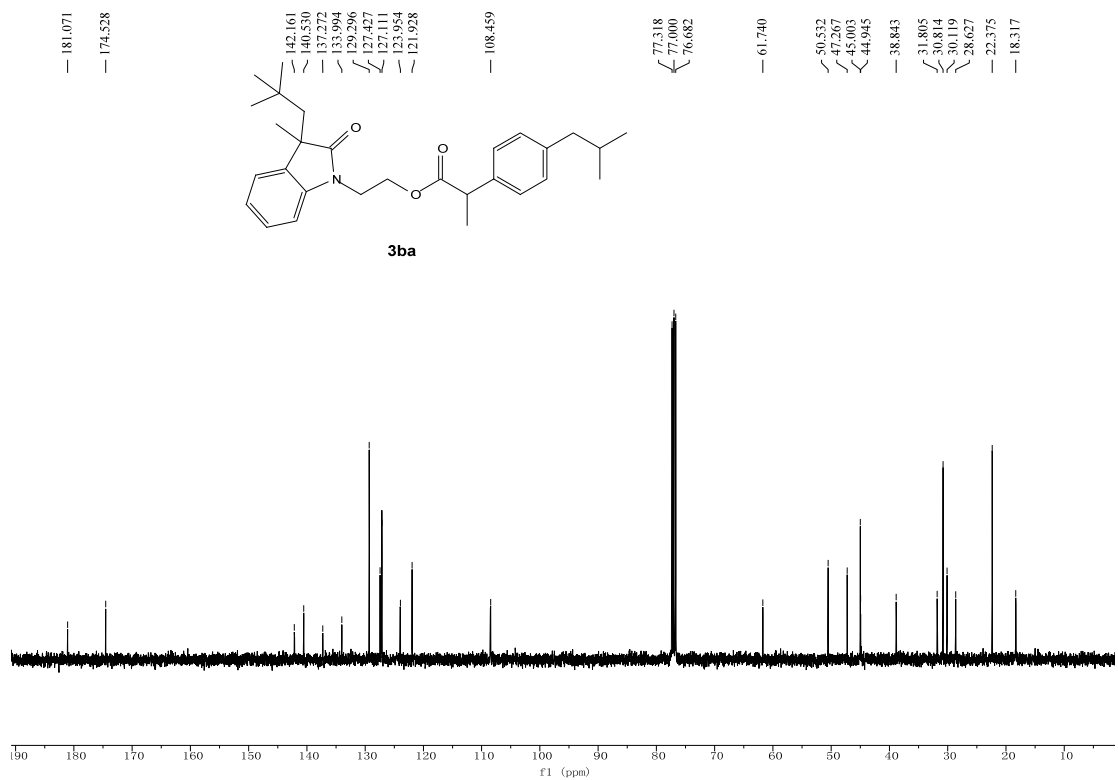

# **$^1\text{H}$ and $^{13}\text{C}$ NMR spectra of 3ca**

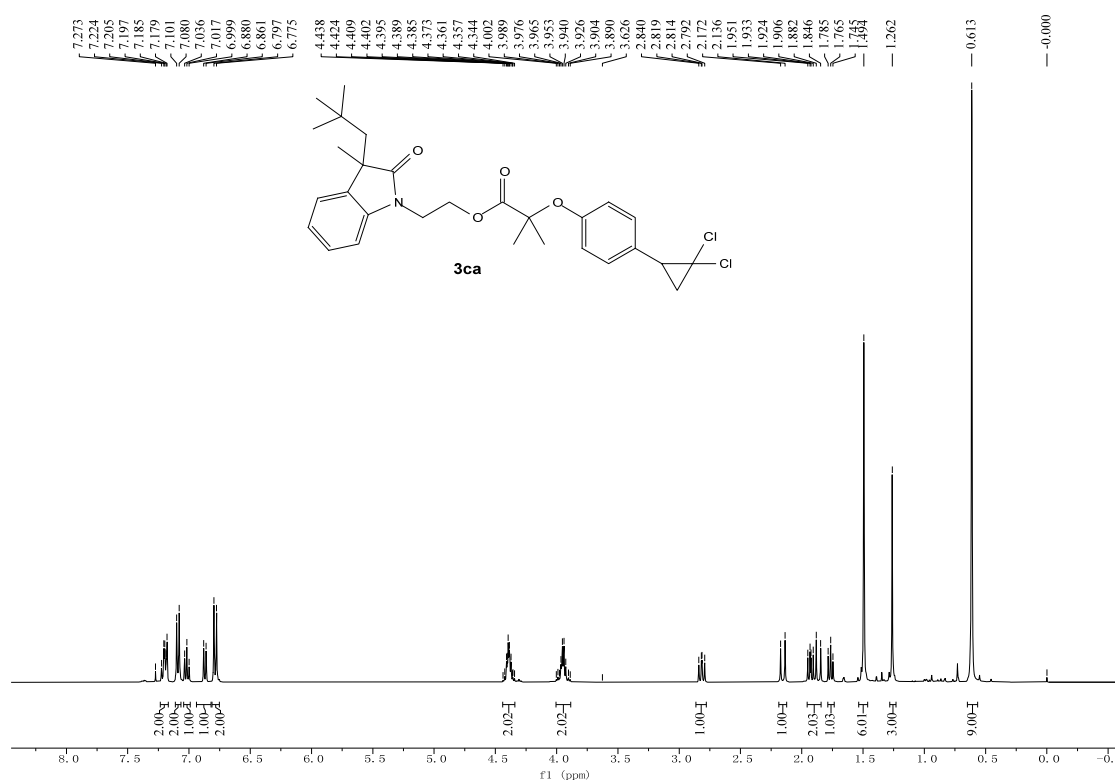

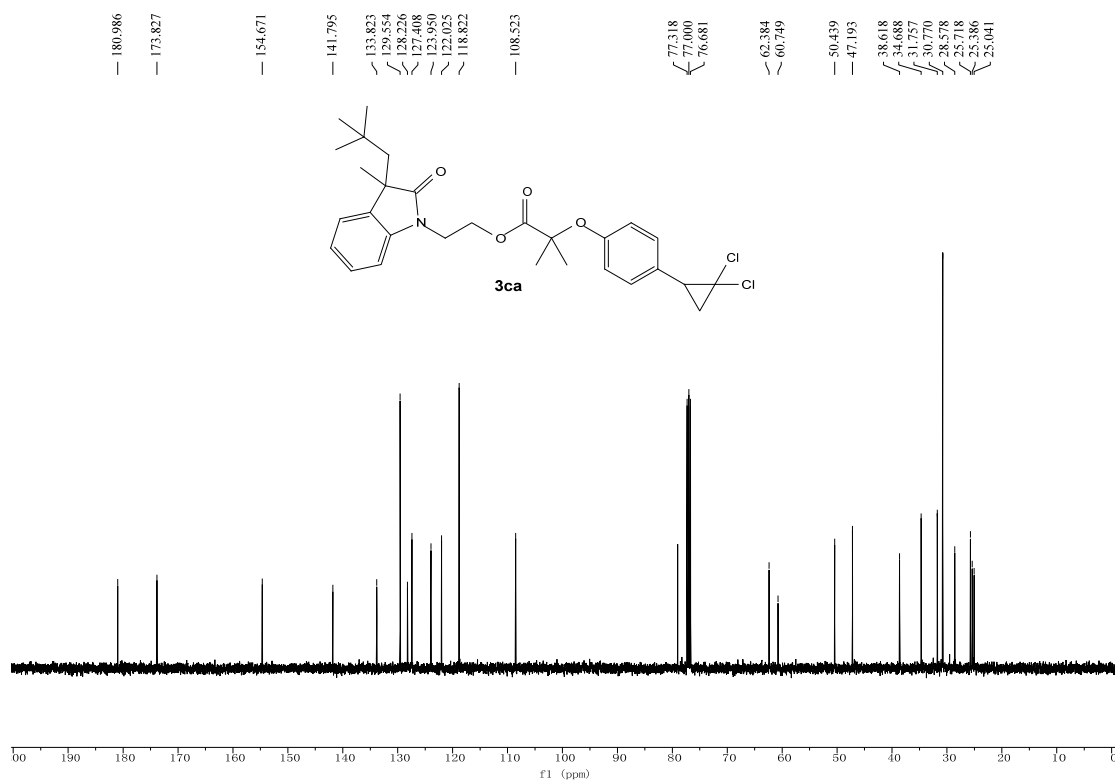

## <sup>1</sup>H and <sup>13</sup>C NMR spectra of 3da

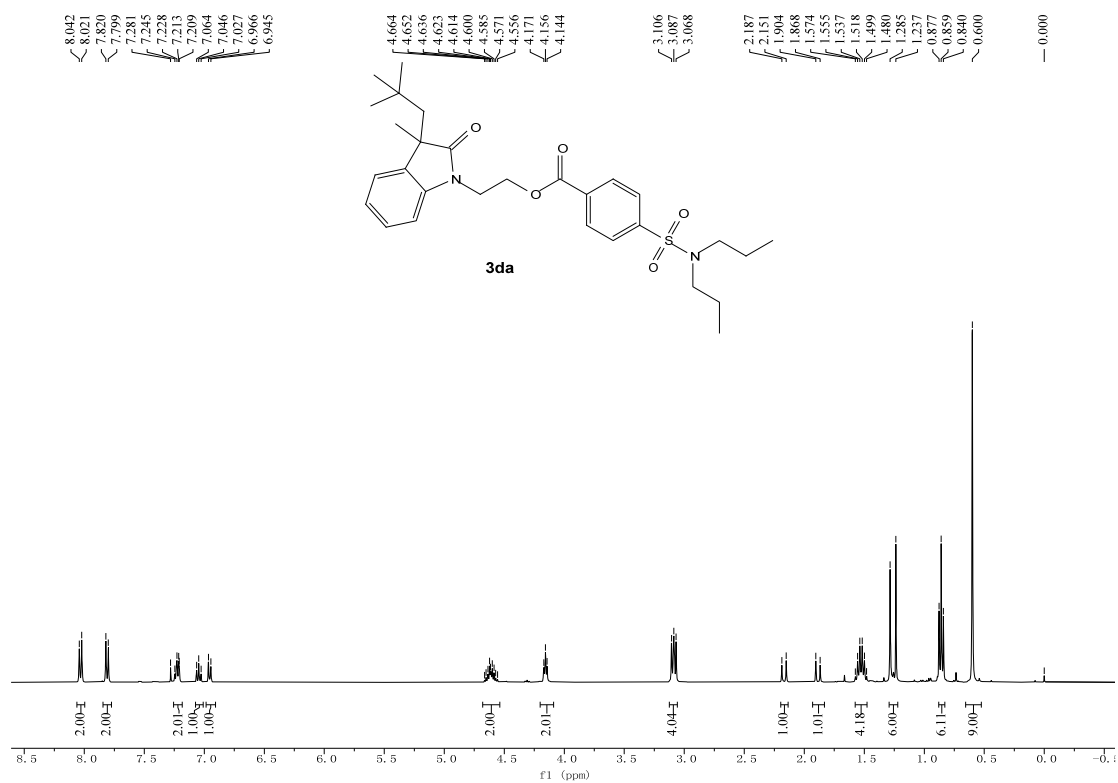

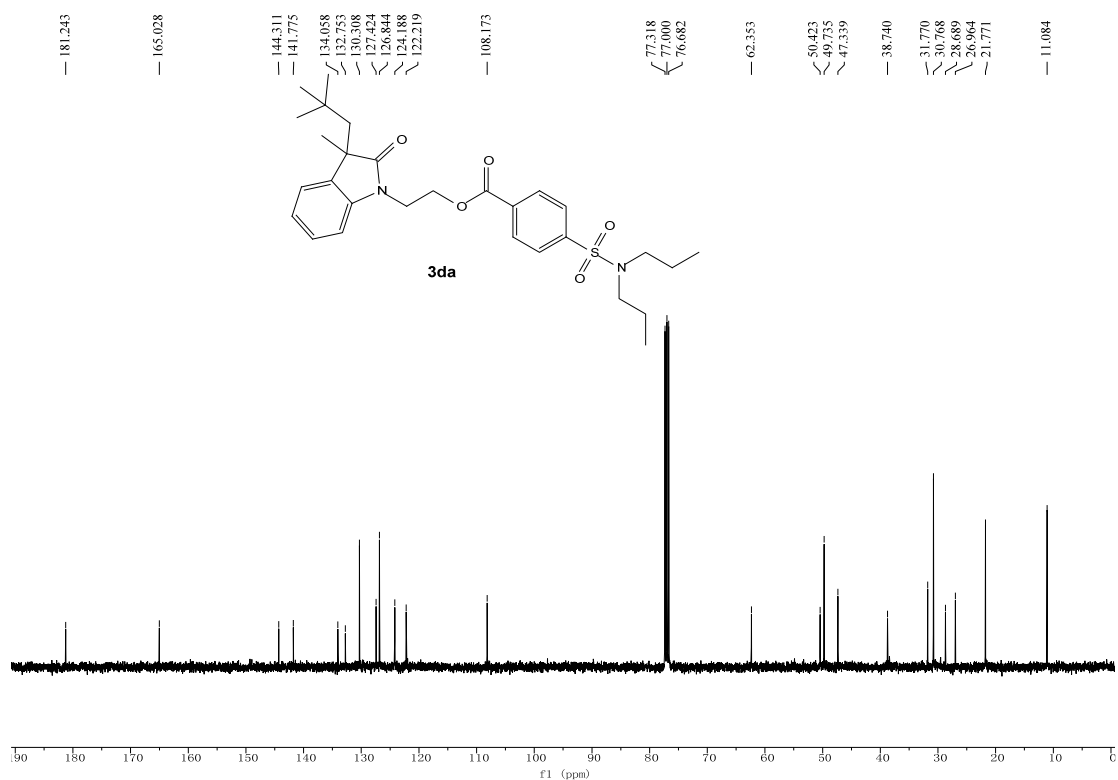

## <sup>1</sup>H and <sup>13</sup>C NMR spectra of 4b

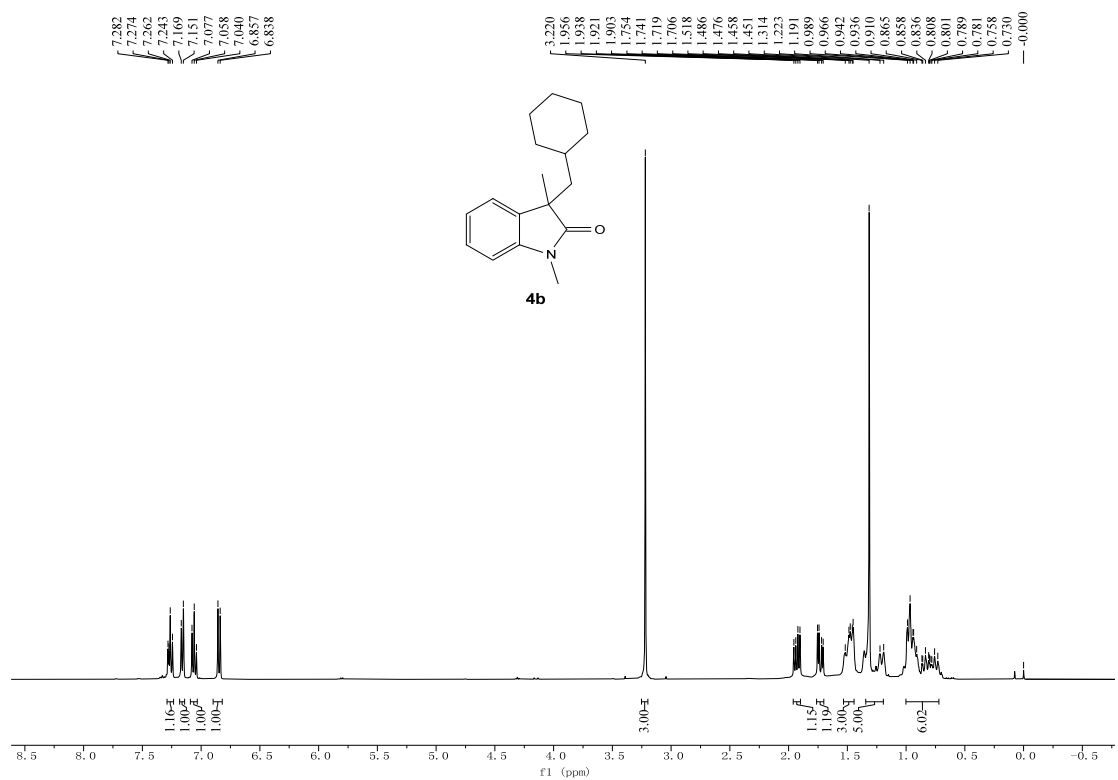

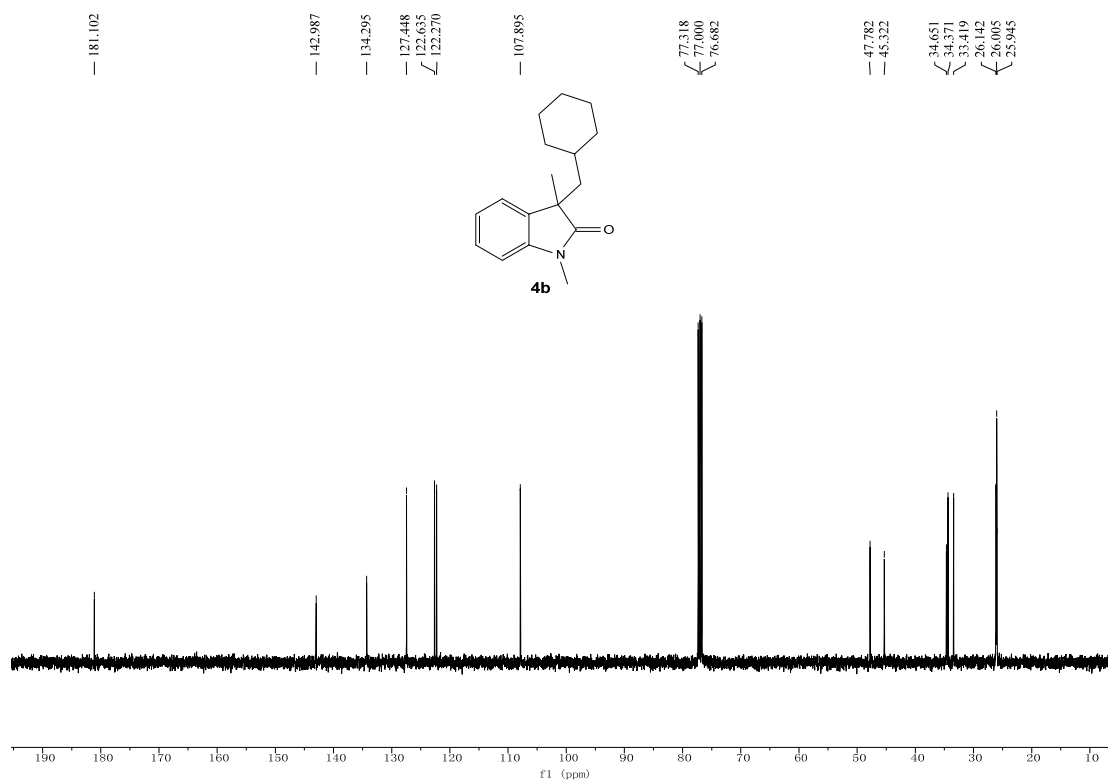

## <sup>1</sup>H and <sup>13</sup>C NMR spectra of 4c

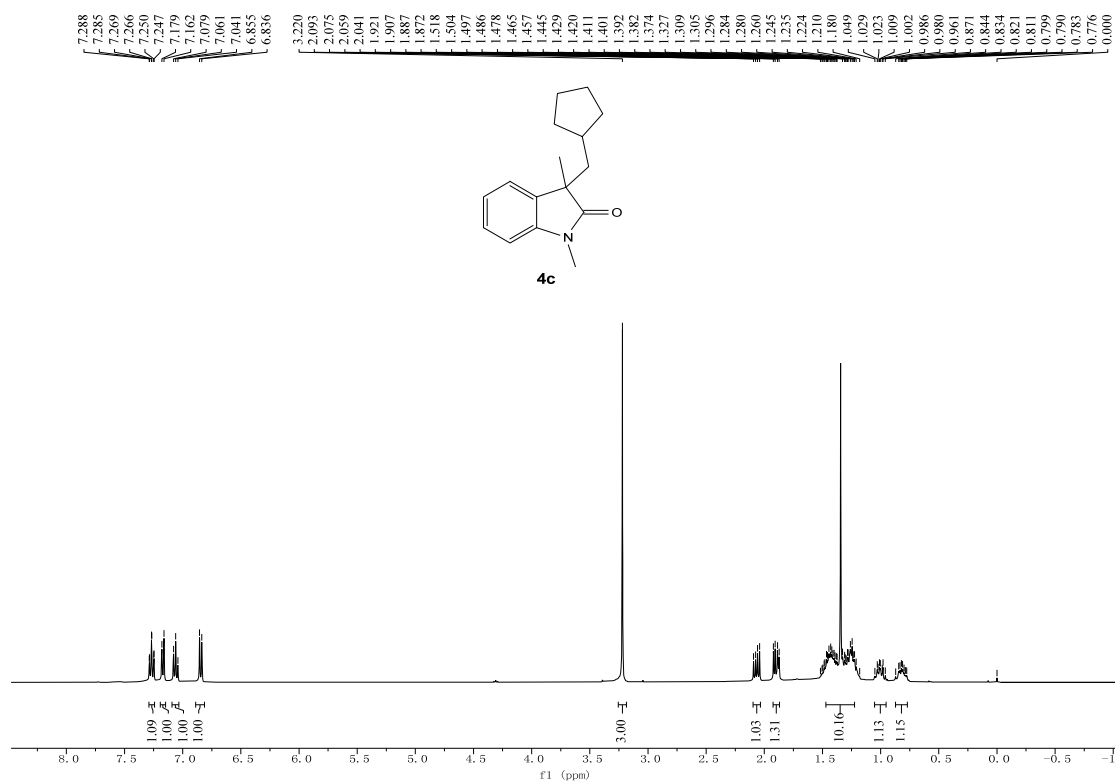

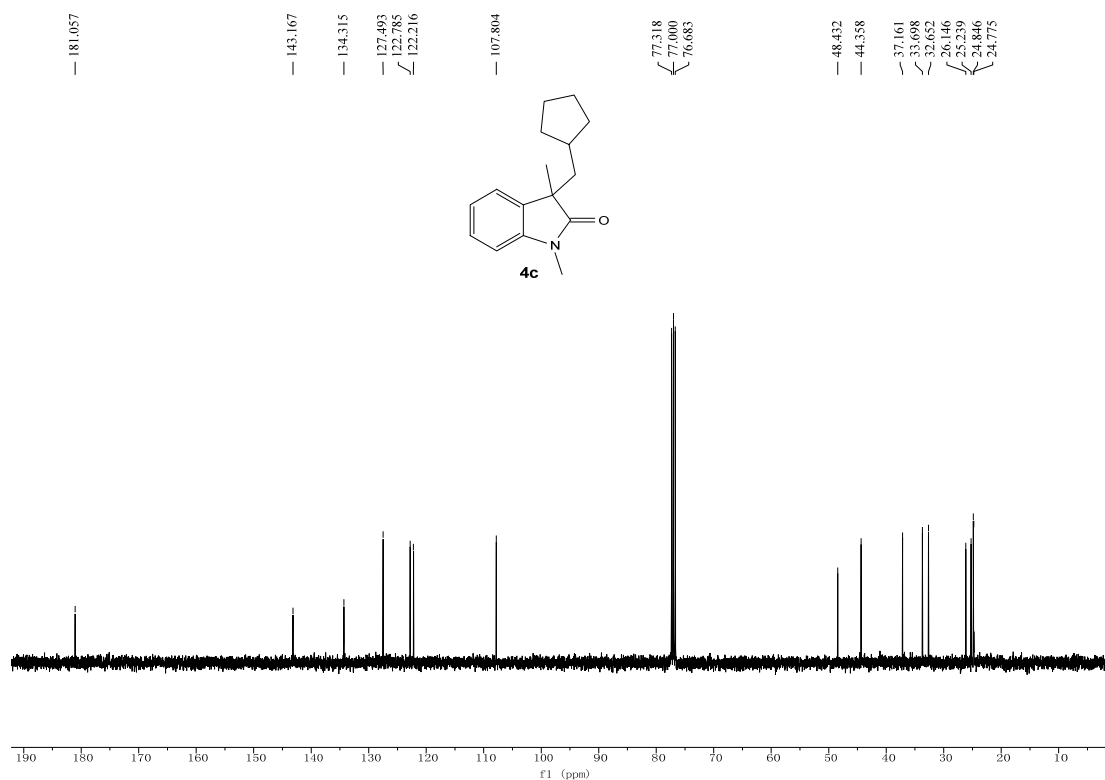

## <sup>1</sup>H and <sup>13</sup>C NMR spectra of 4d

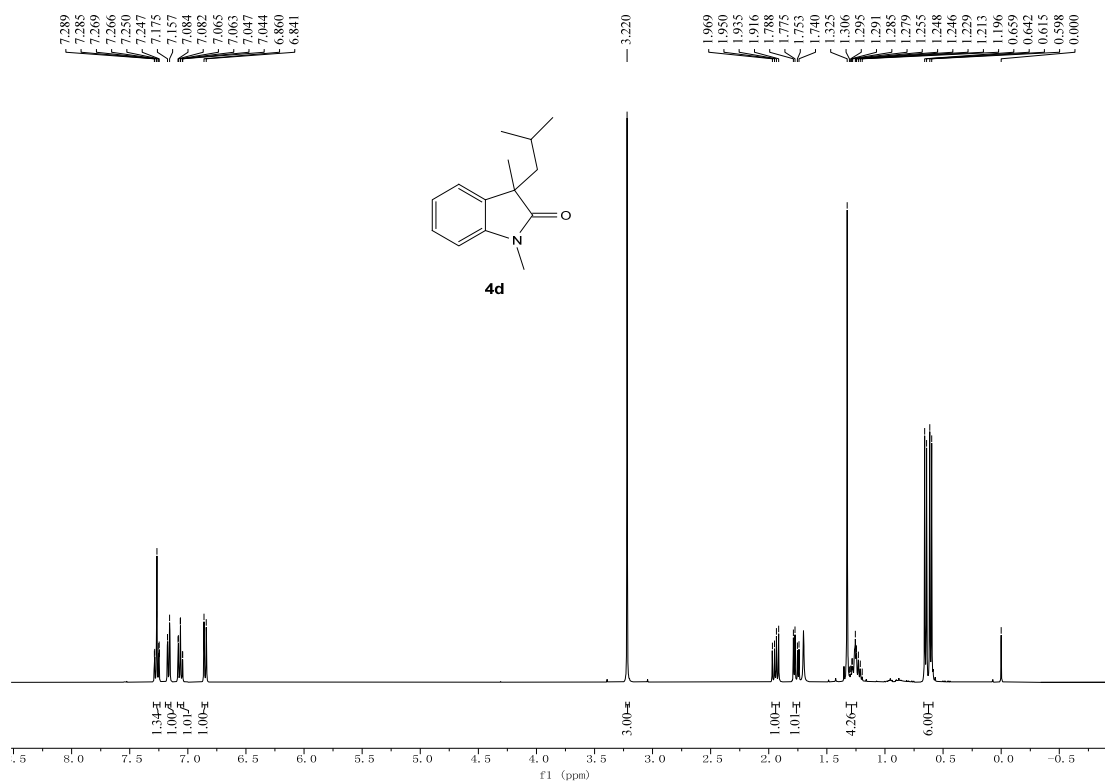

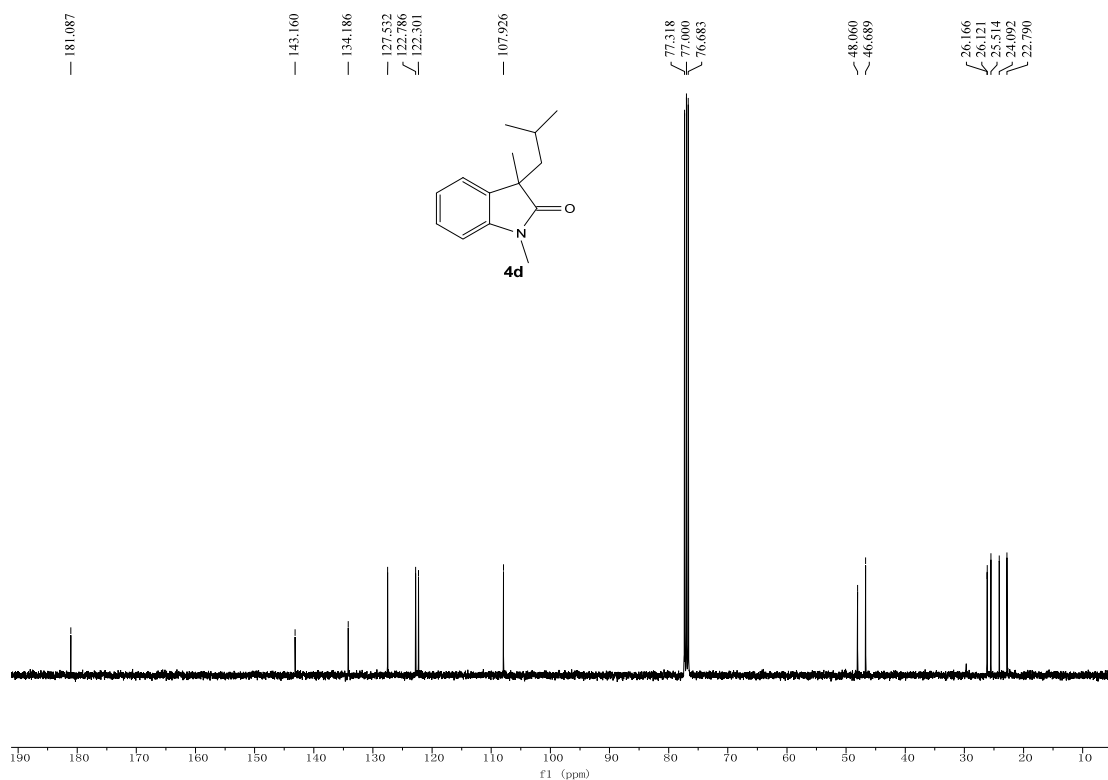

## <sup>1</sup>H and <sup>13</sup>C NMR spectra of 4e

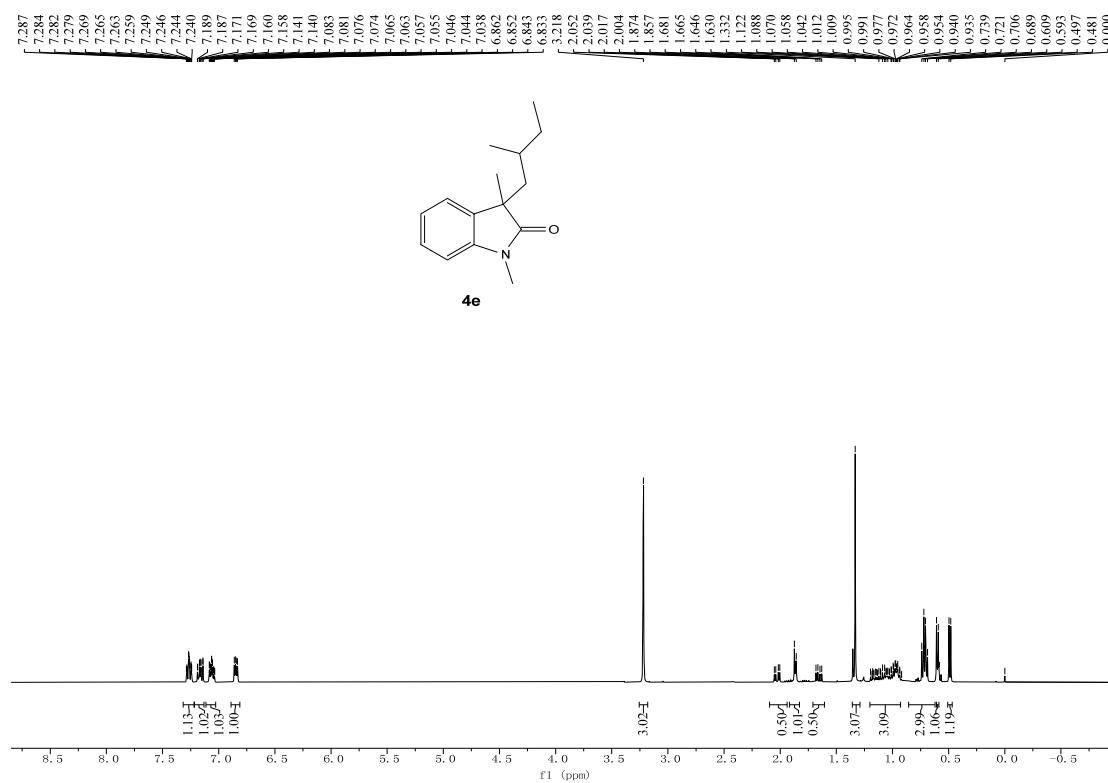

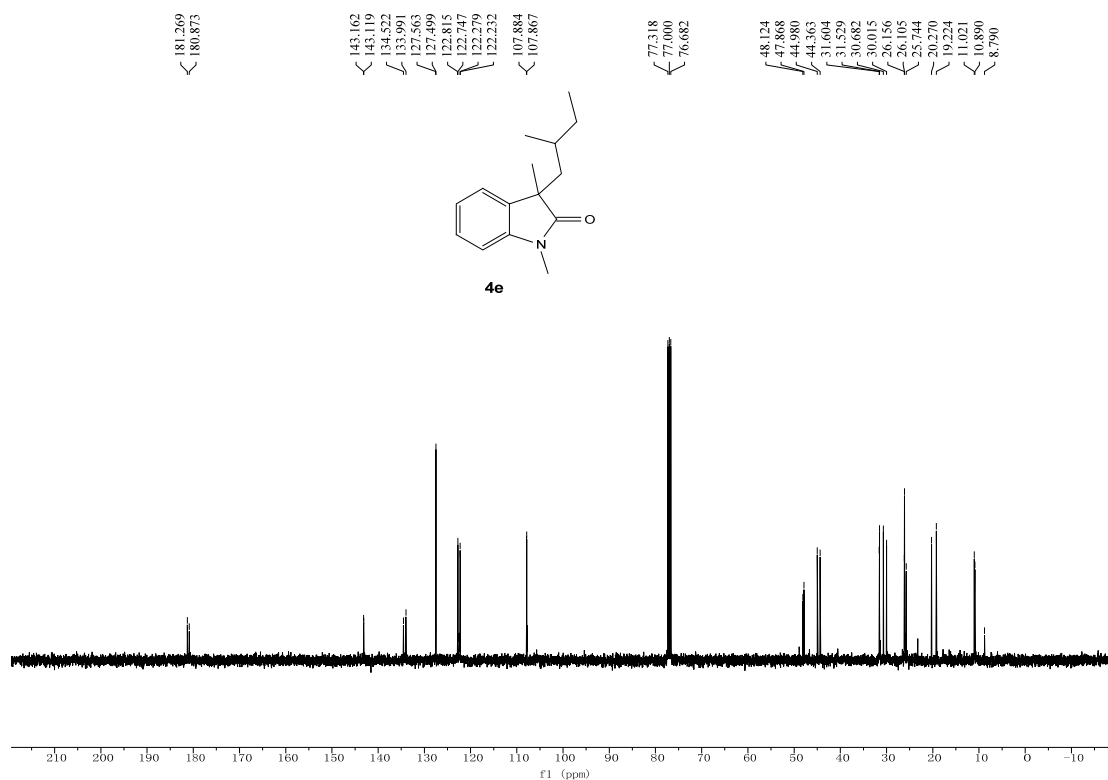

## <sup>1</sup>H and <sup>13</sup>C NMR spectra of 4f

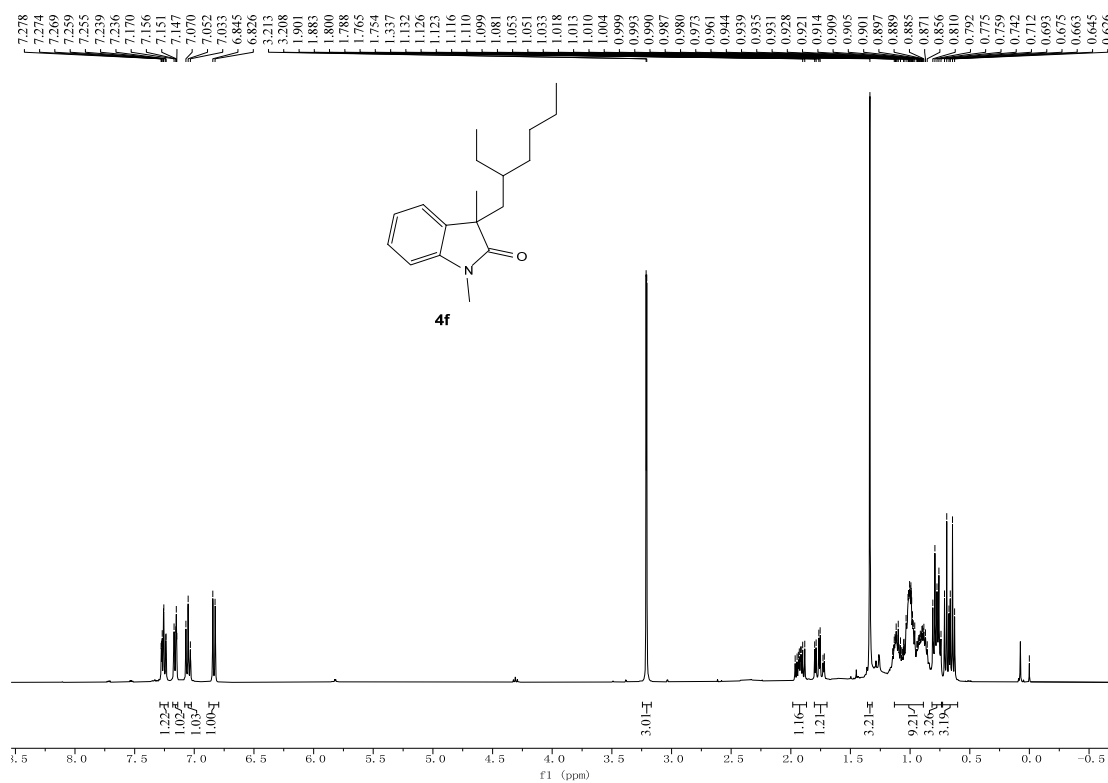

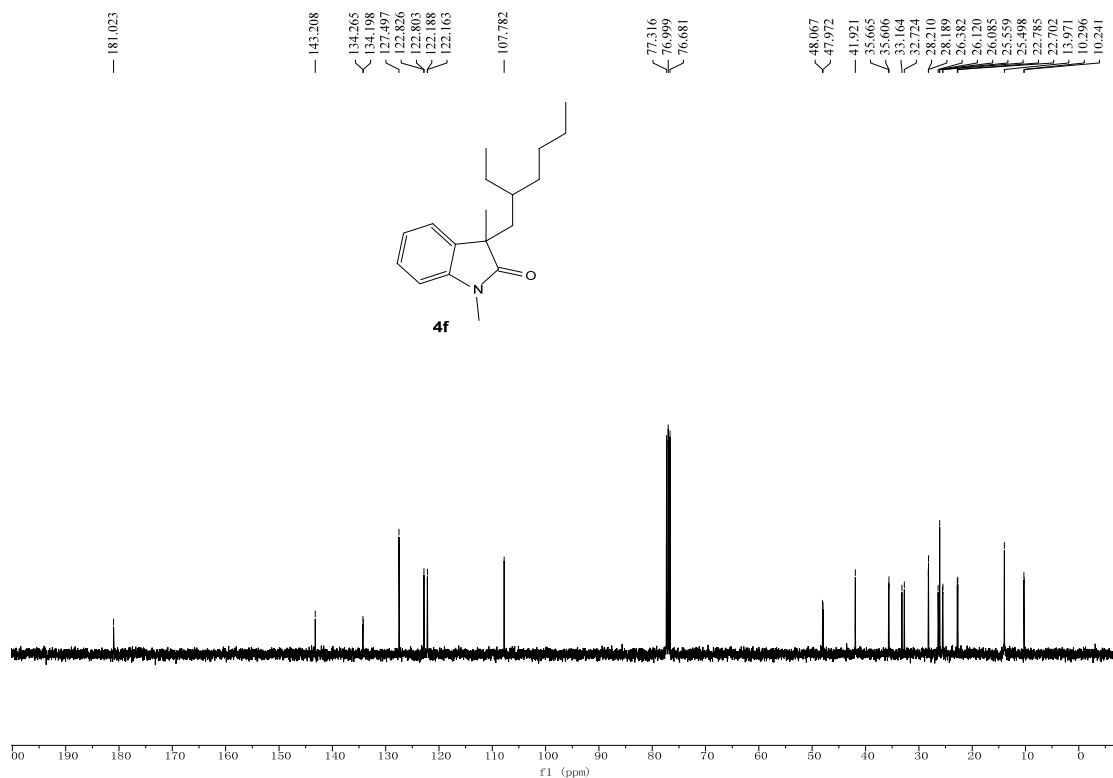

## <sup>1</sup>H and <sup>13</sup>C NMR spectra of 4g

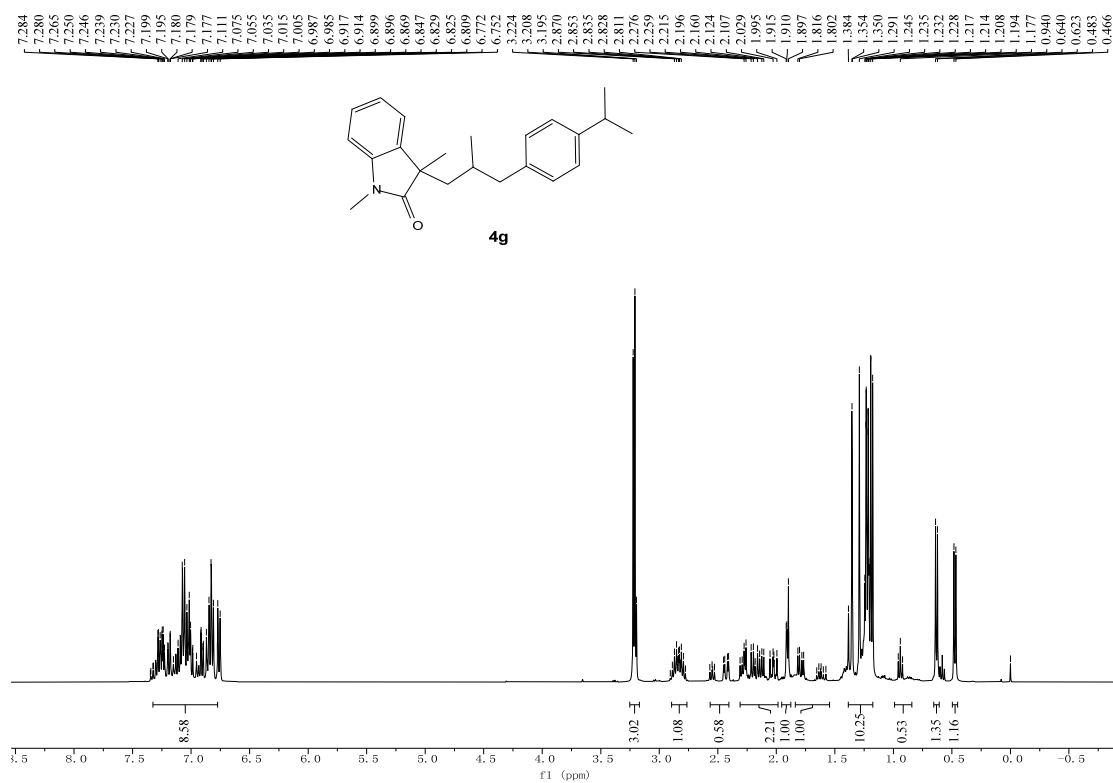

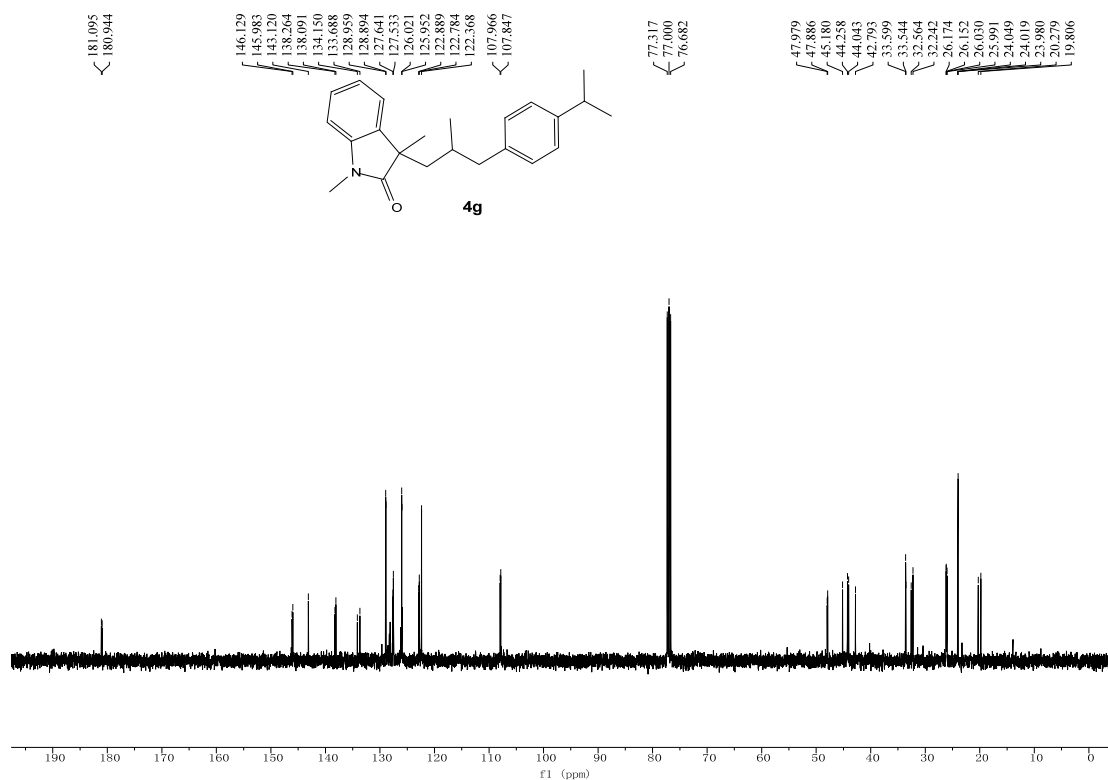

## <sup>1</sup>H and <sup>13</sup>C NMR spectra of 4h

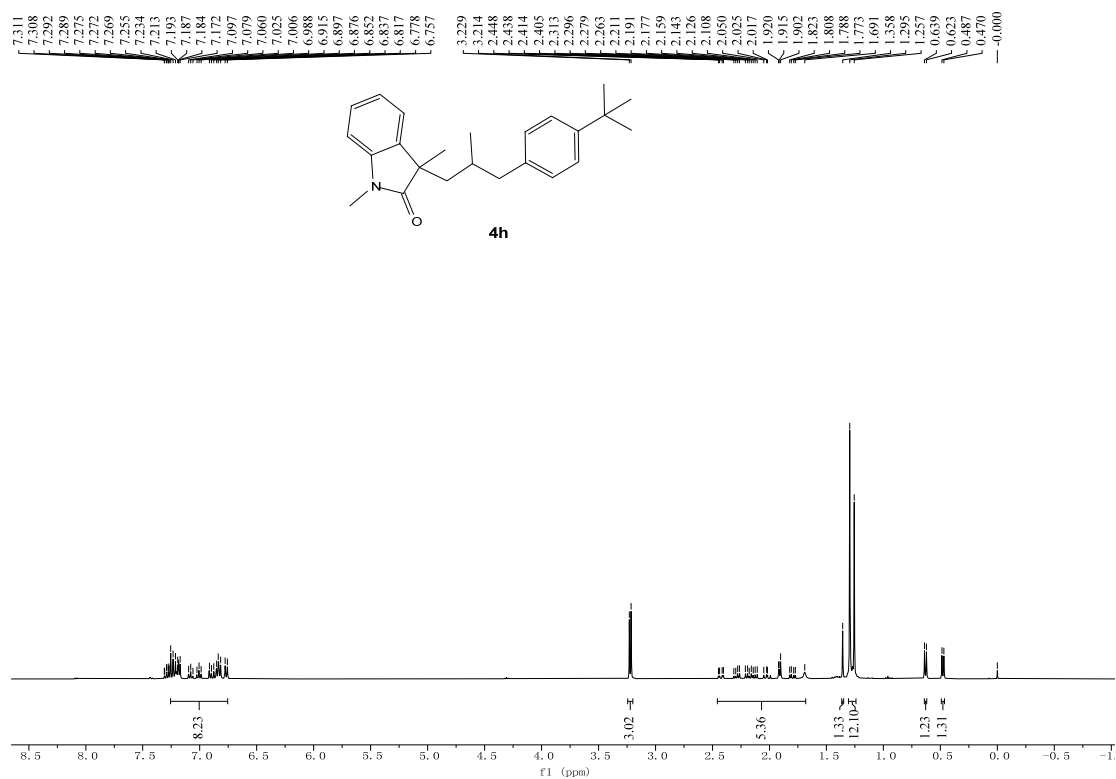

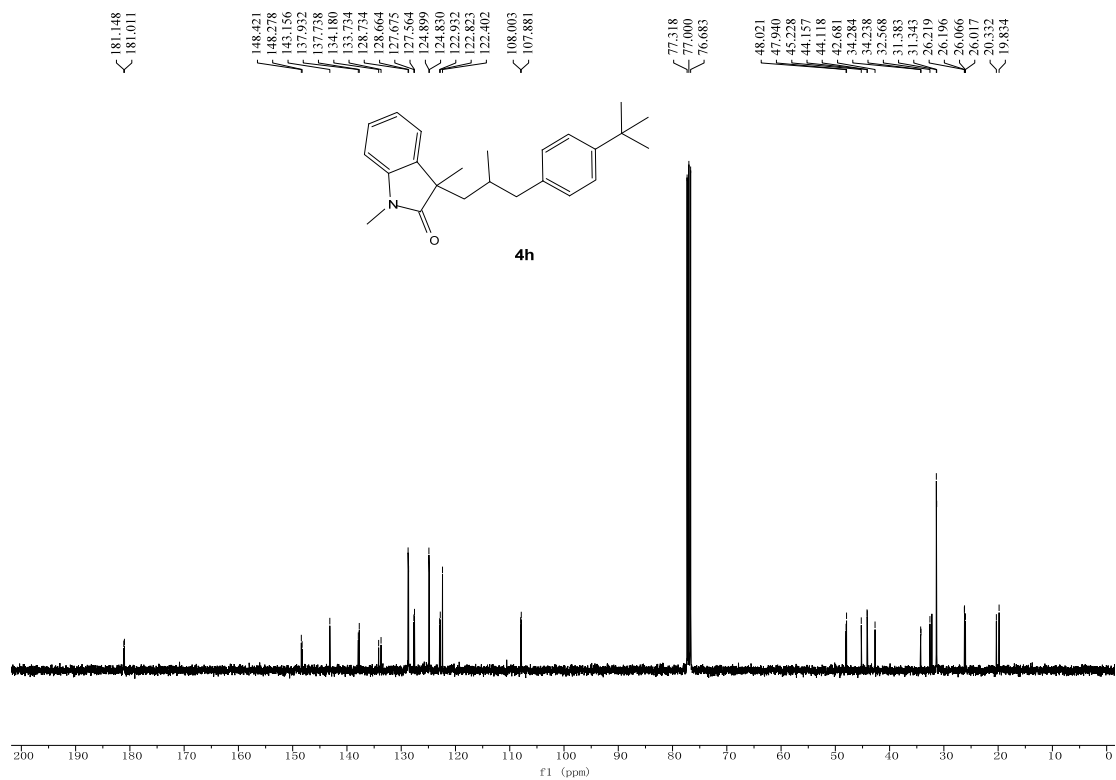

## <sup>1</sup>H and <sup>13</sup>C NMR spectra of **6a**

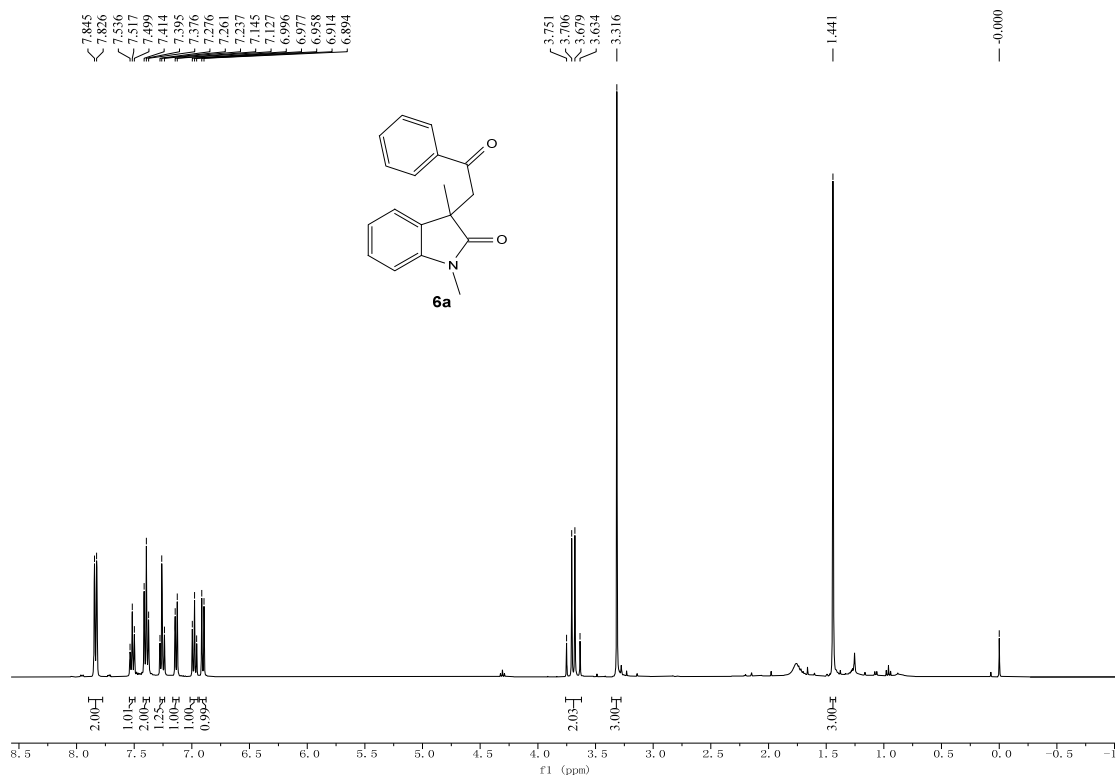

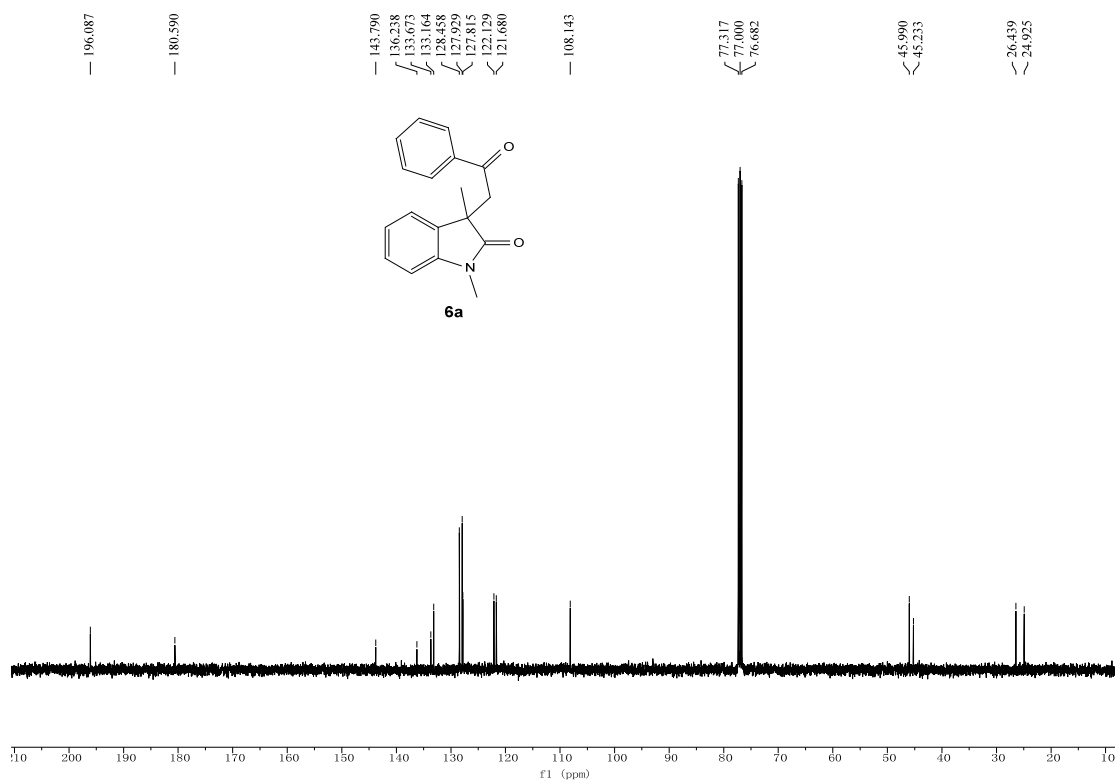

## **<sup>1</sup>H and <sup>13</sup>C NMR spectra of 6b**

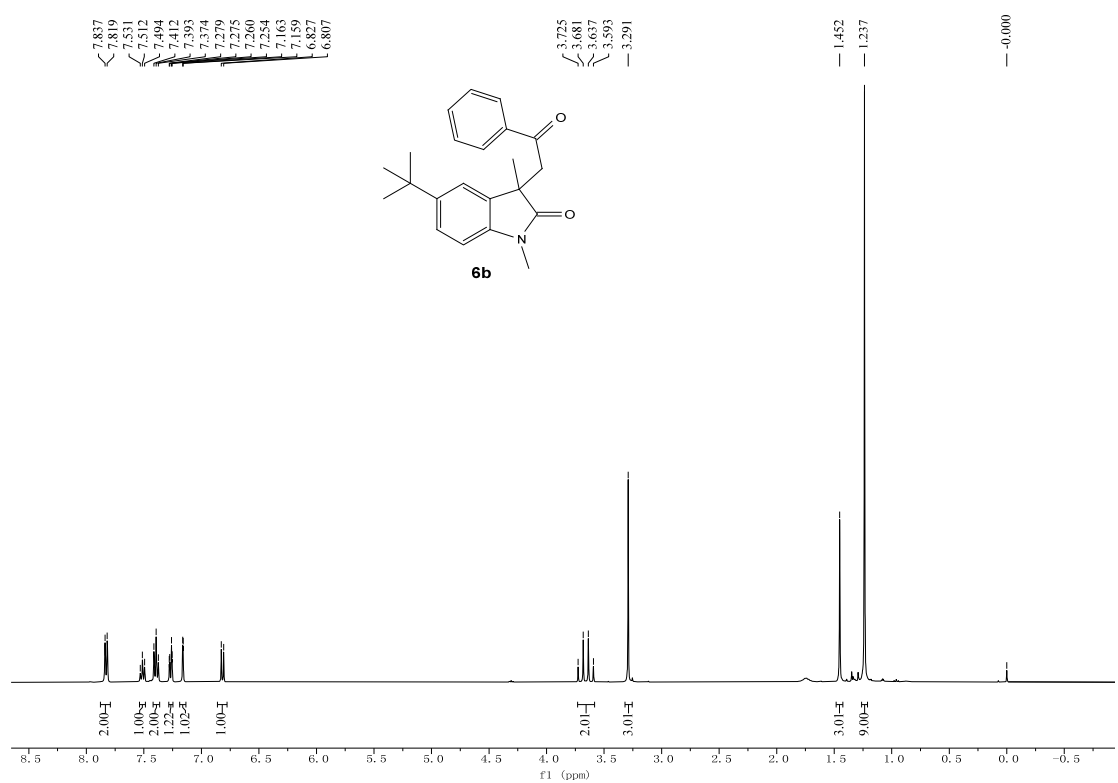

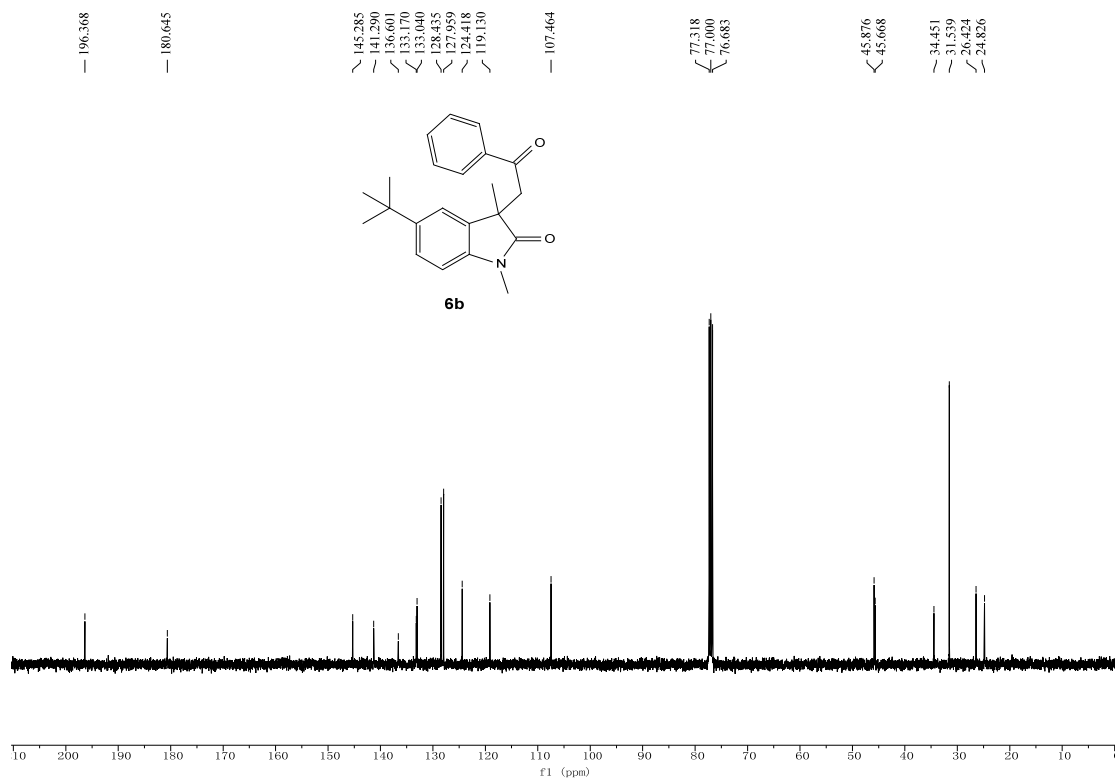

## <sup>1</sup>H and <sup>13</sup>C NMR spectra of 6c

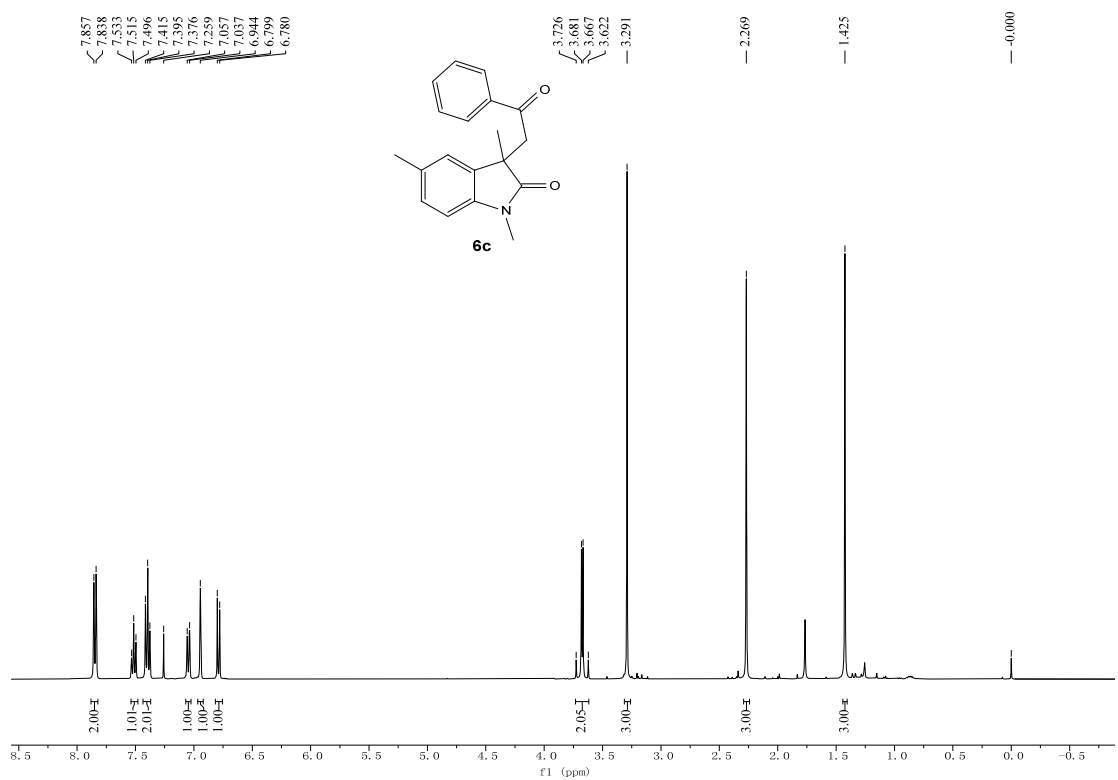

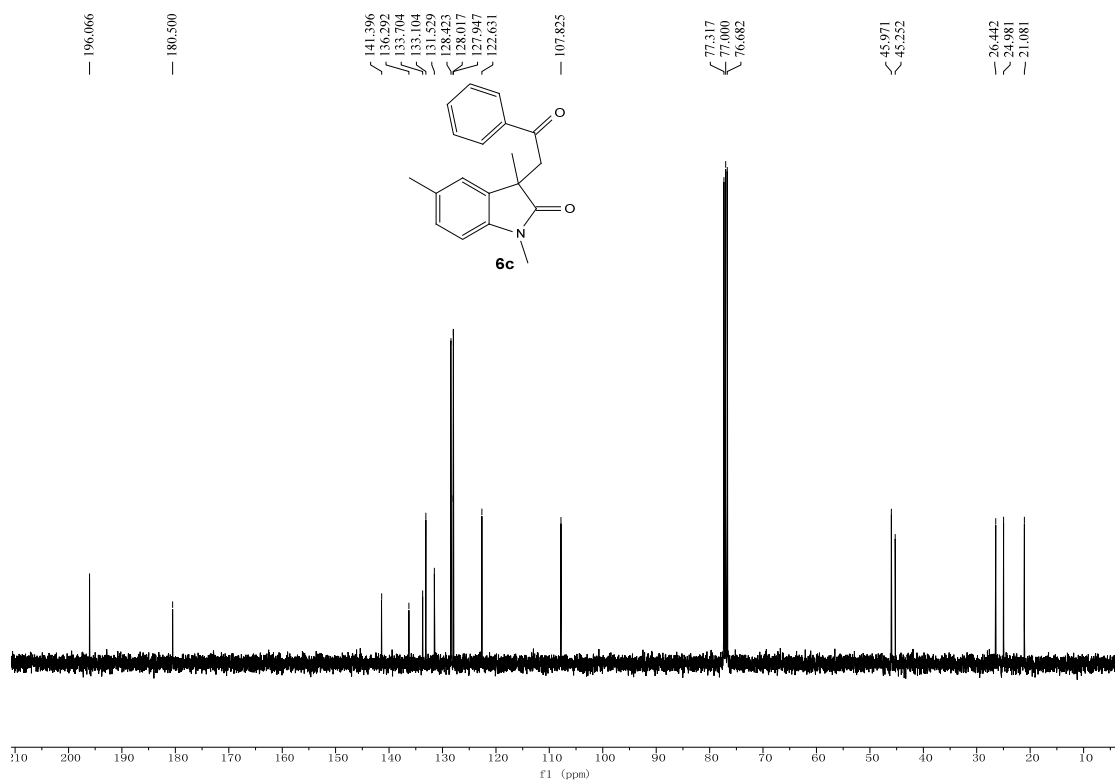

# **<sup>1</sup>H and <sup>13</sup>C NMR spectra of 6d**

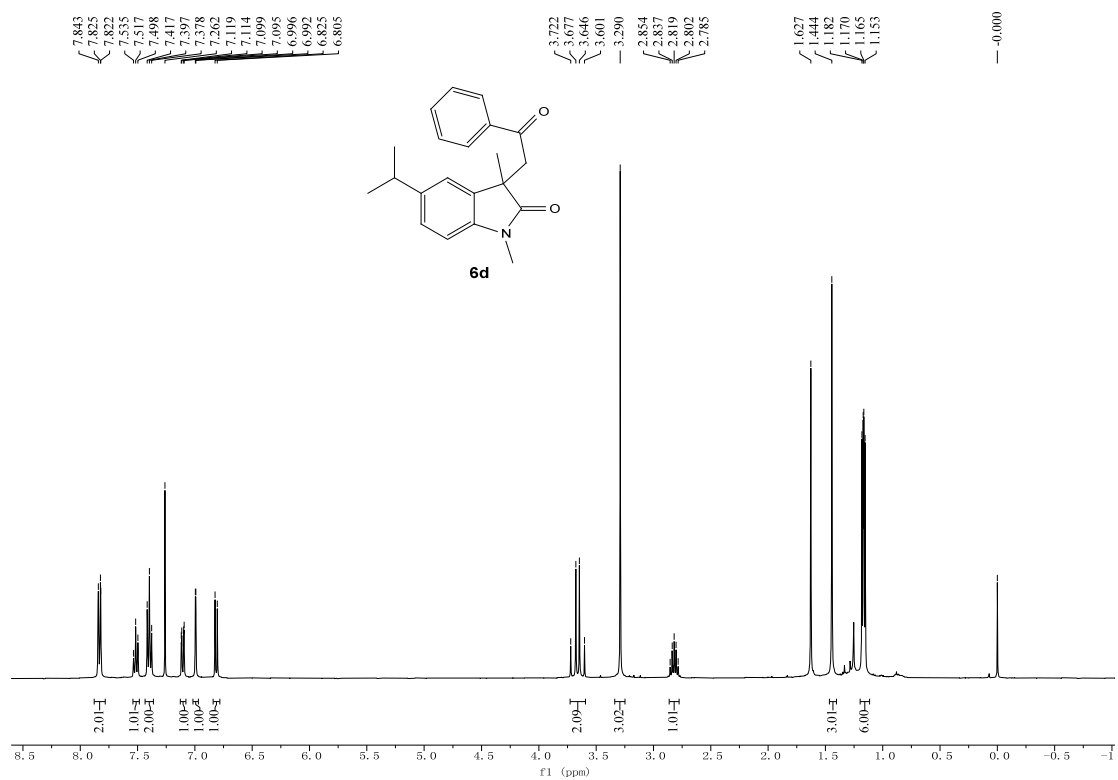

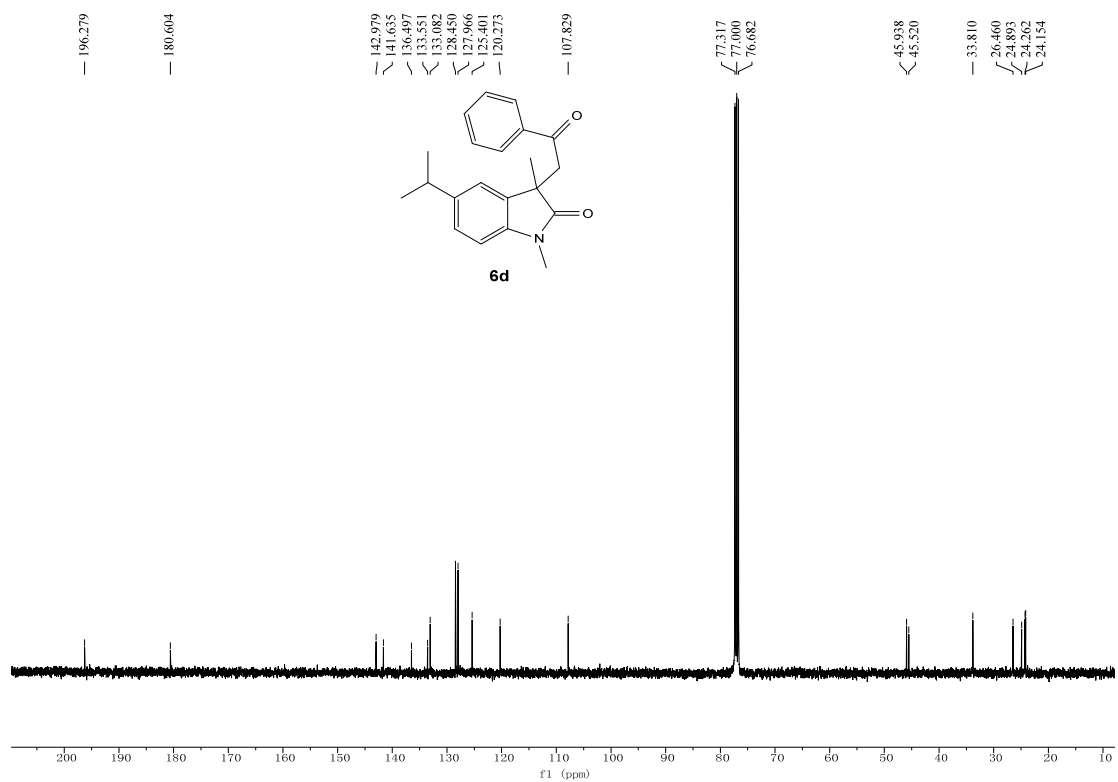

# <sup>1</sup>H and <sup>13</sup>C NMR spectra of **6e**

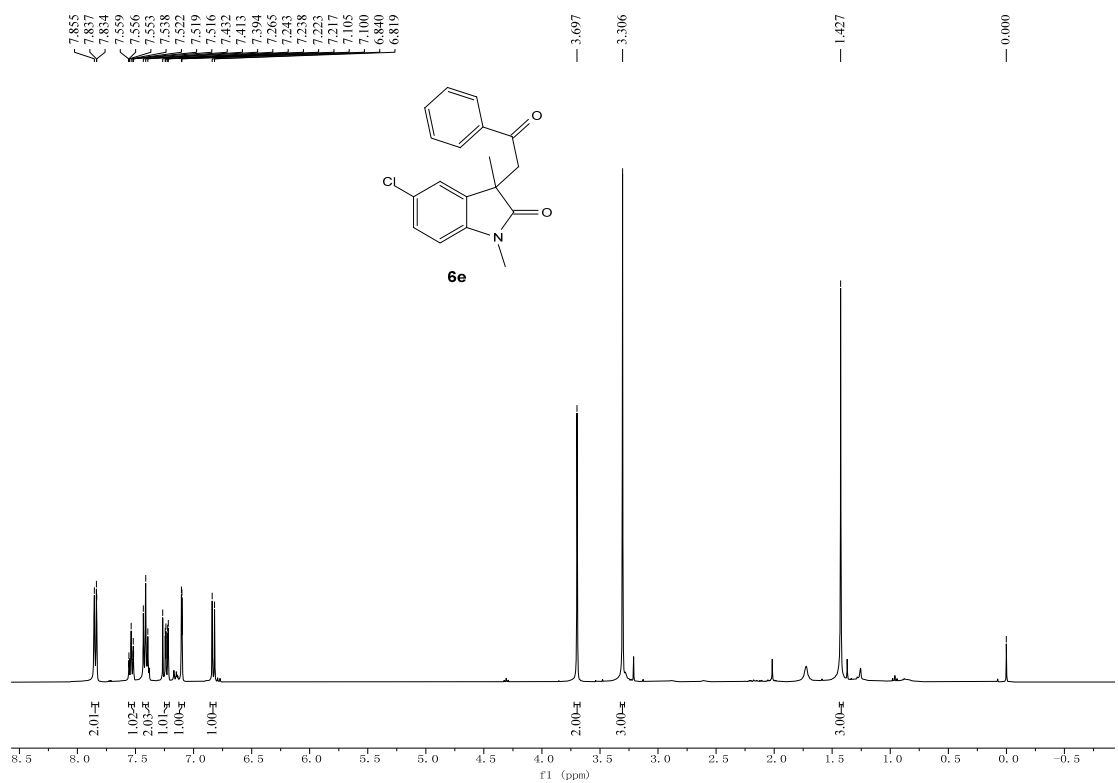

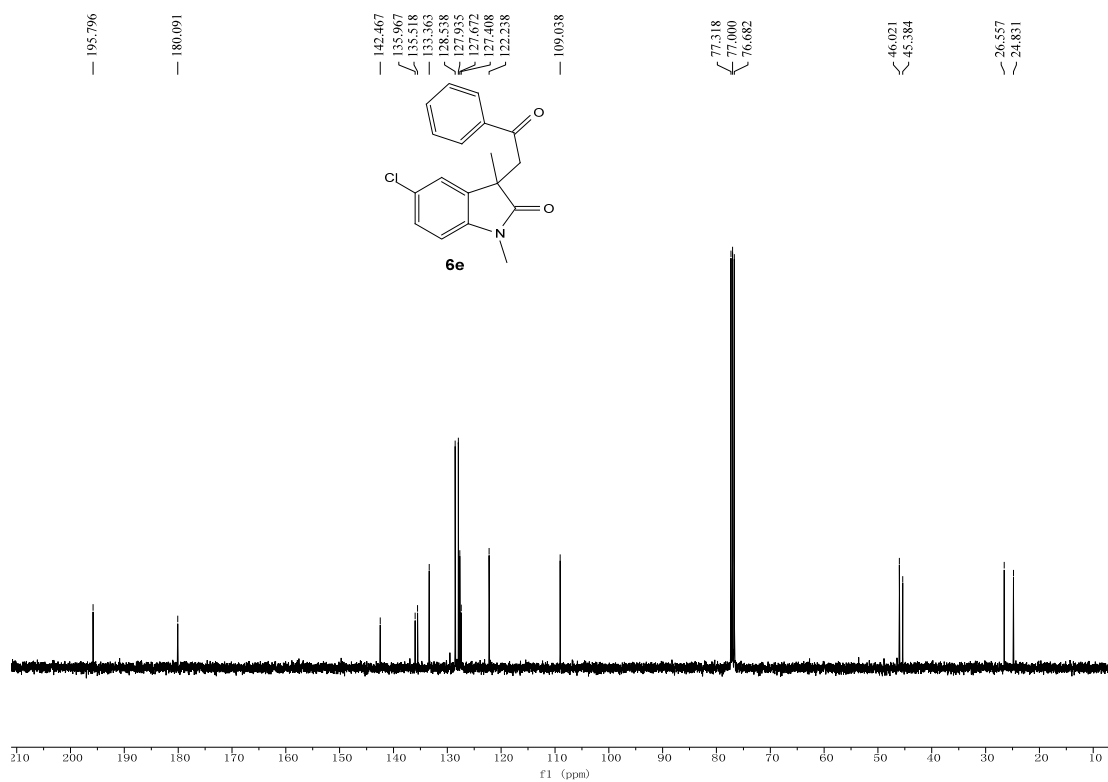

**<sup>1</sup>H and <sup>13</sup>C NMR spectra of 6f**

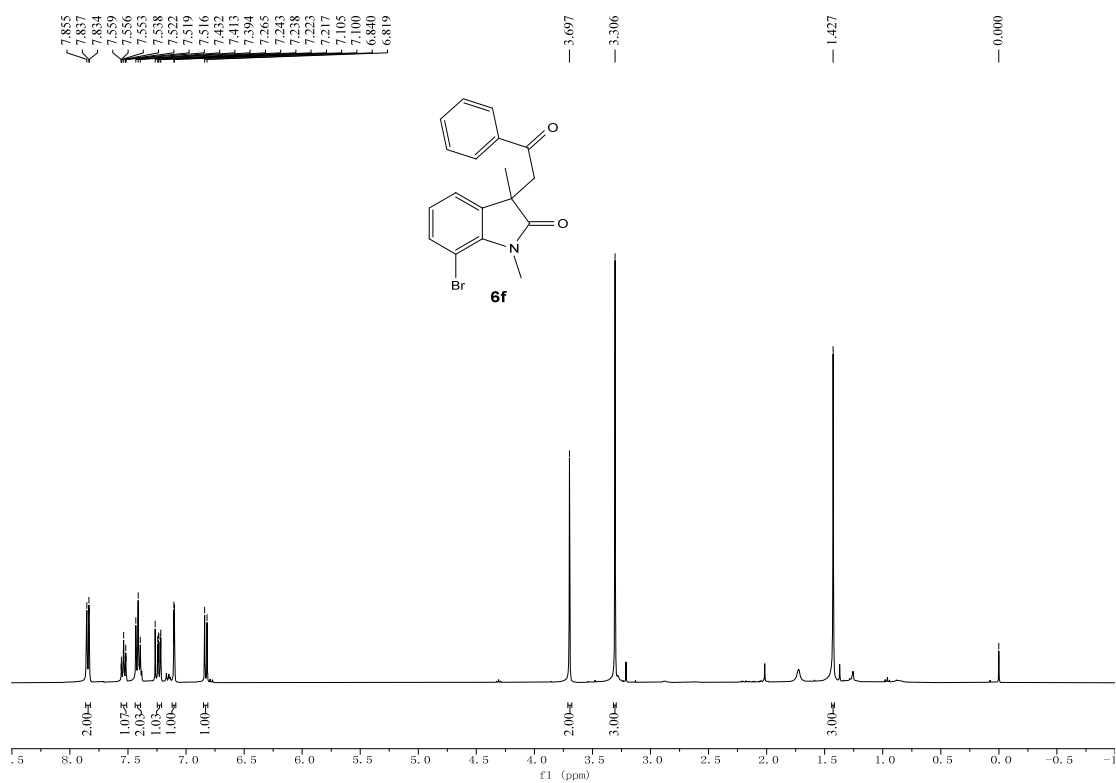

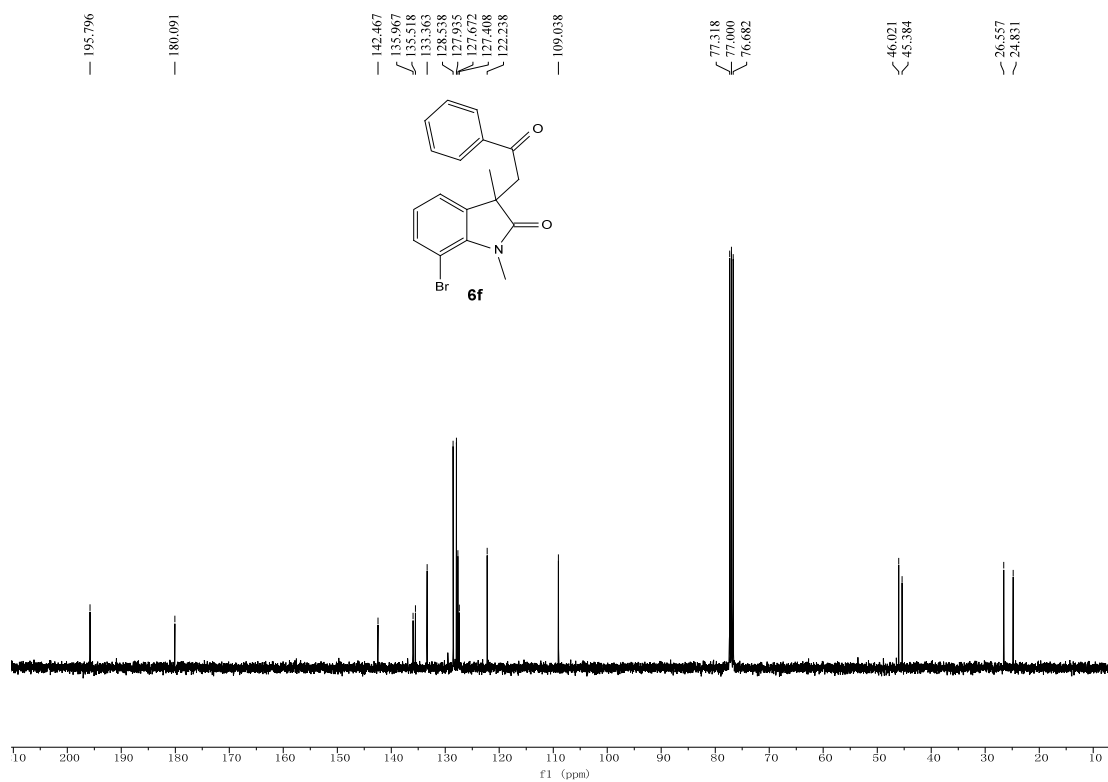

## <sup>1</sup>H and <sup>13</sup>C NMR spectra of 6g

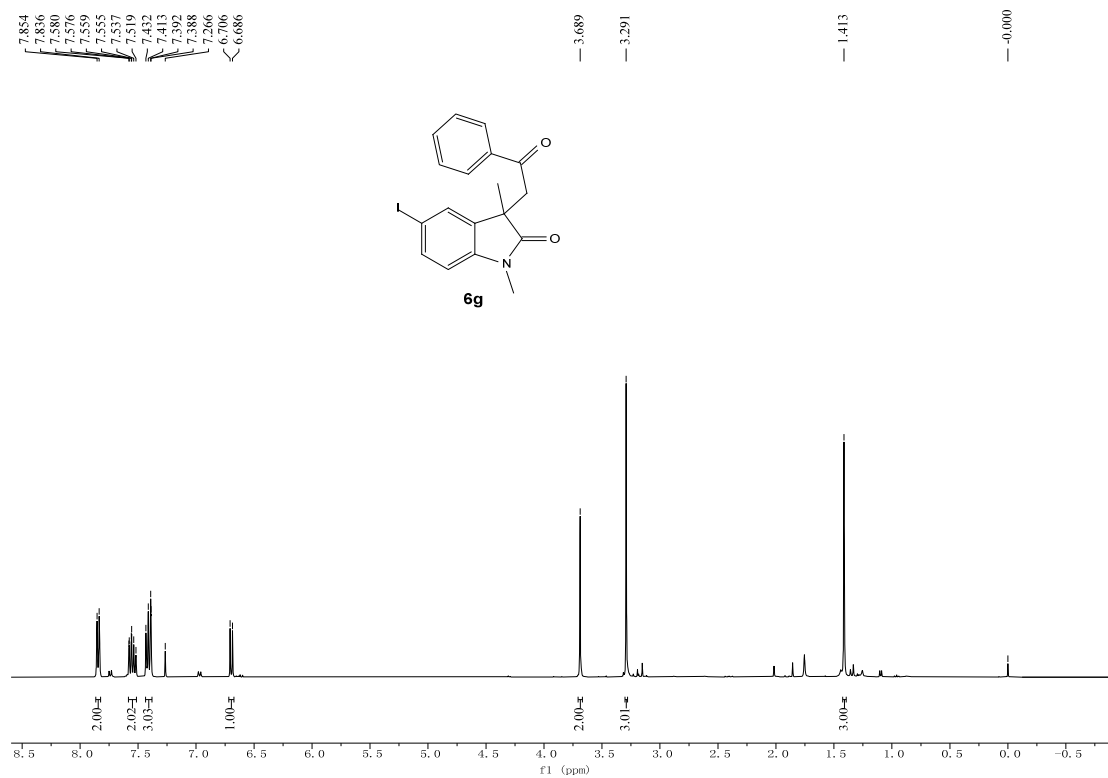

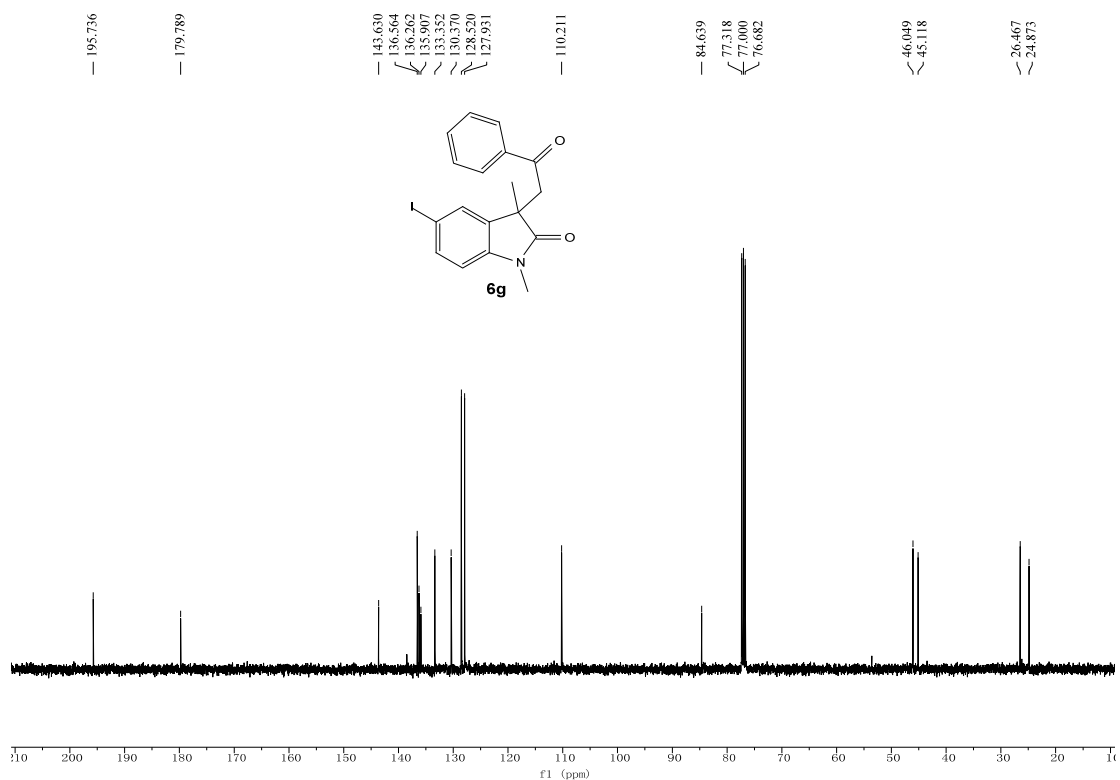

## <sup>1</sup>H and <sup>13</sup>C NMR spectra of 6h

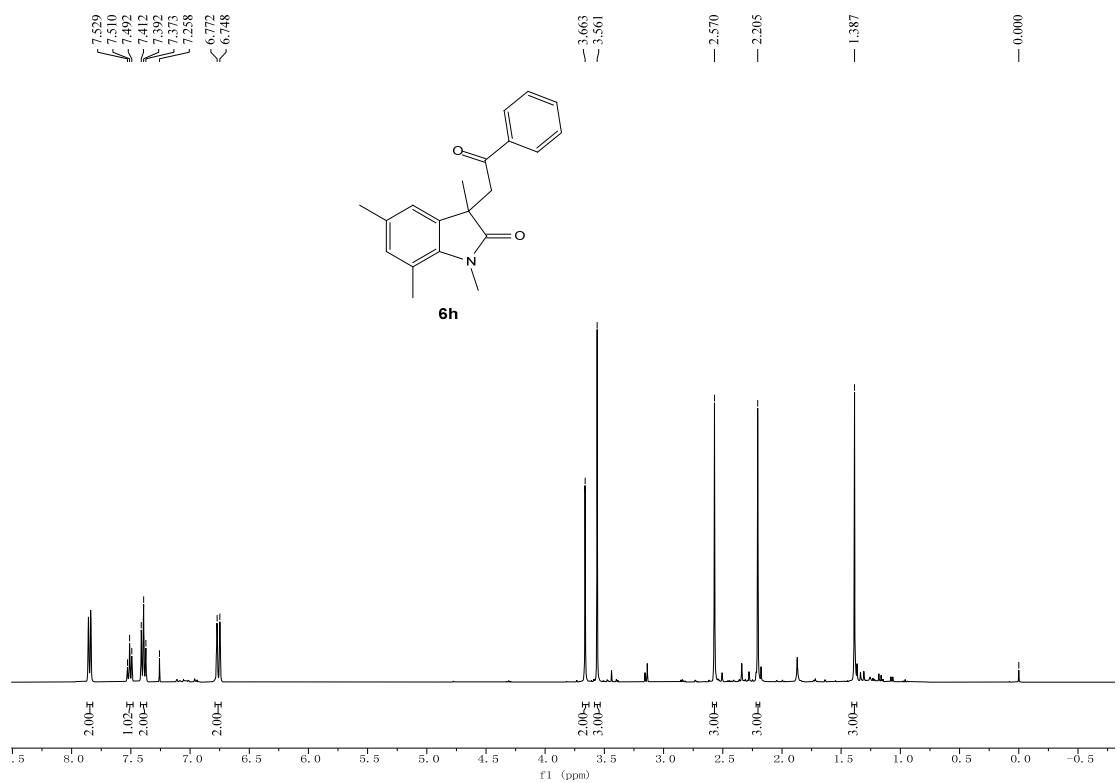

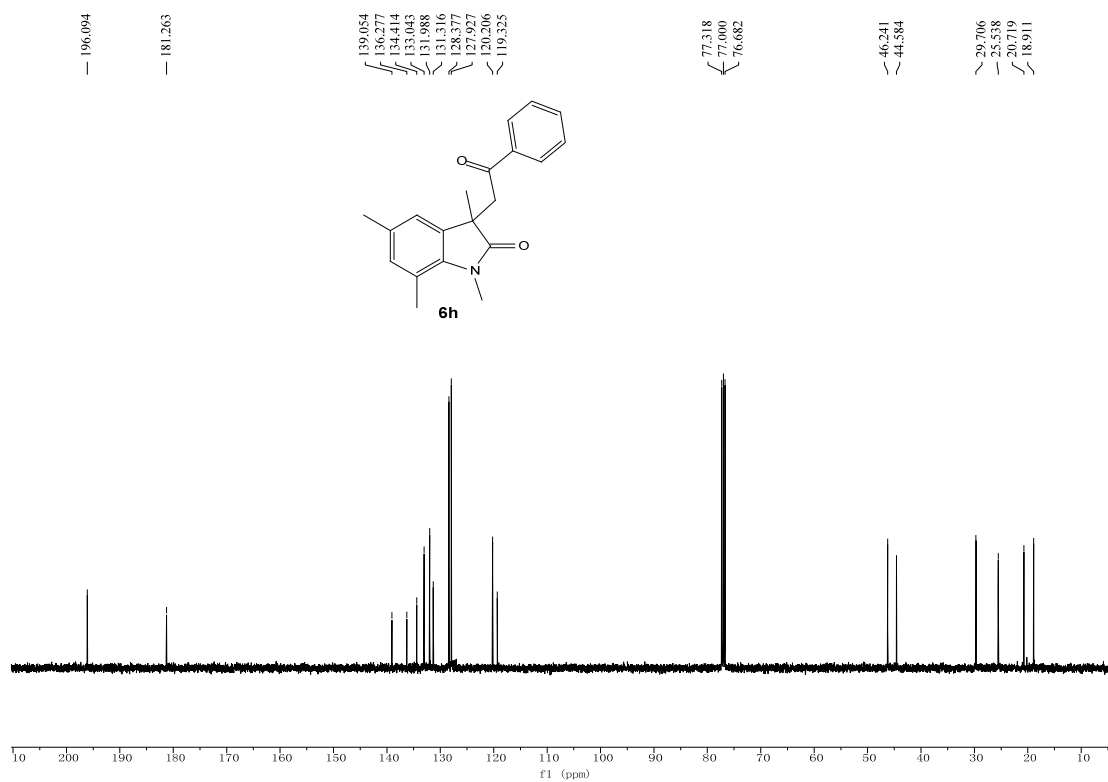

**<sup>1</sup>H and <sup>13</sup>C NMR spectra of 6i**

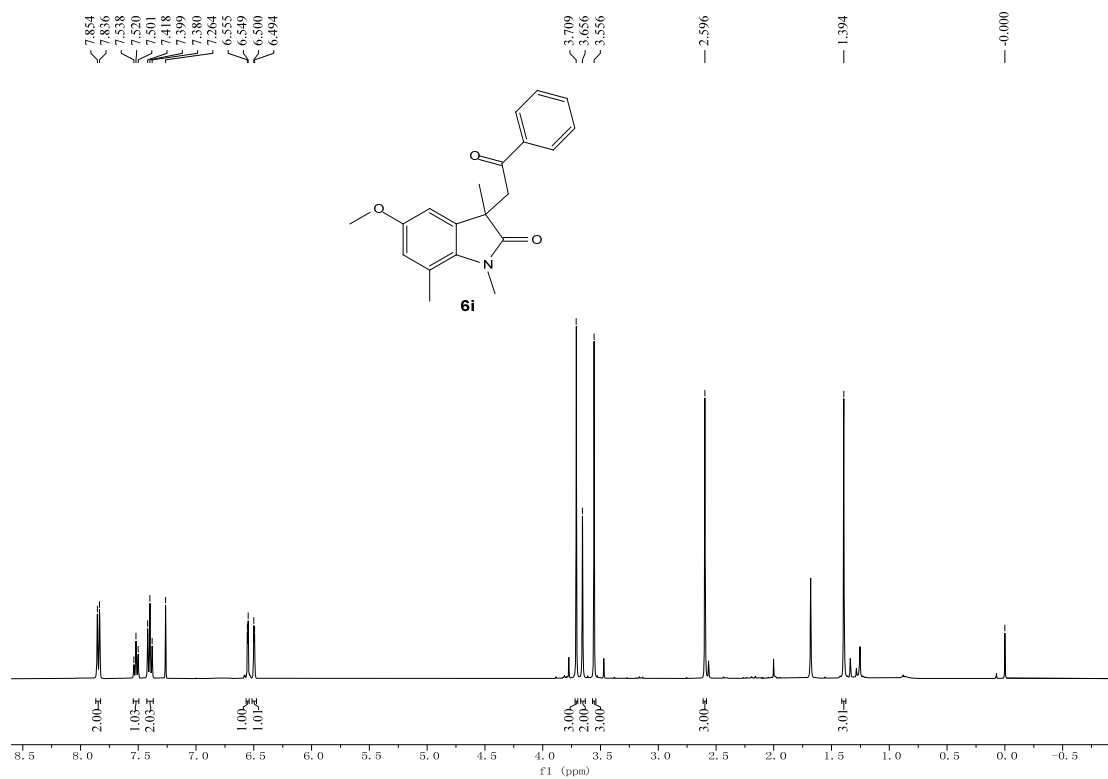

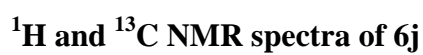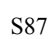

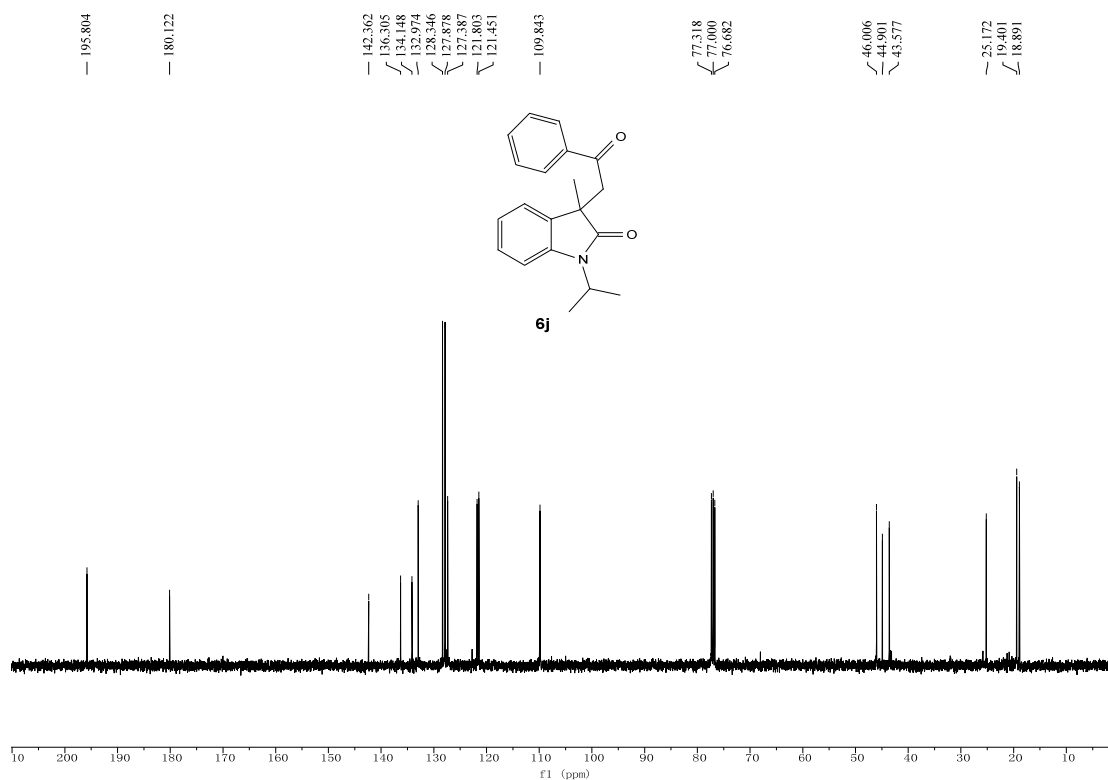

## <sup>1</sup>H and <sup>13</sup>C NMR spectra of **6k**

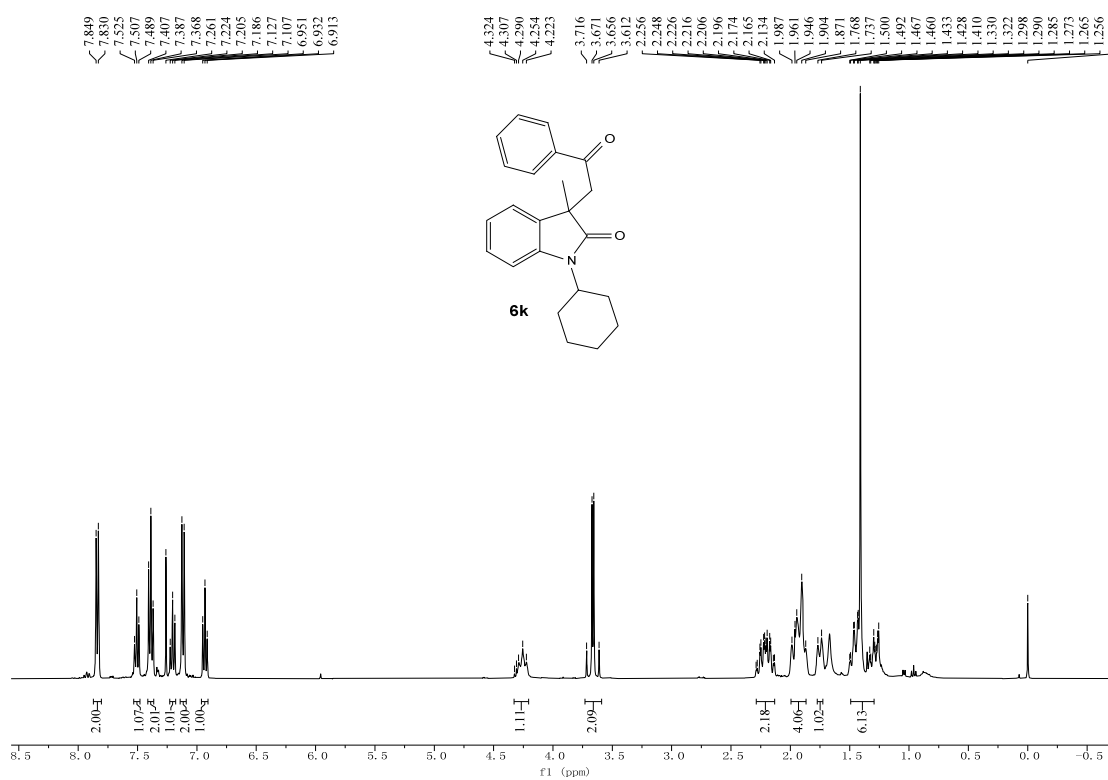

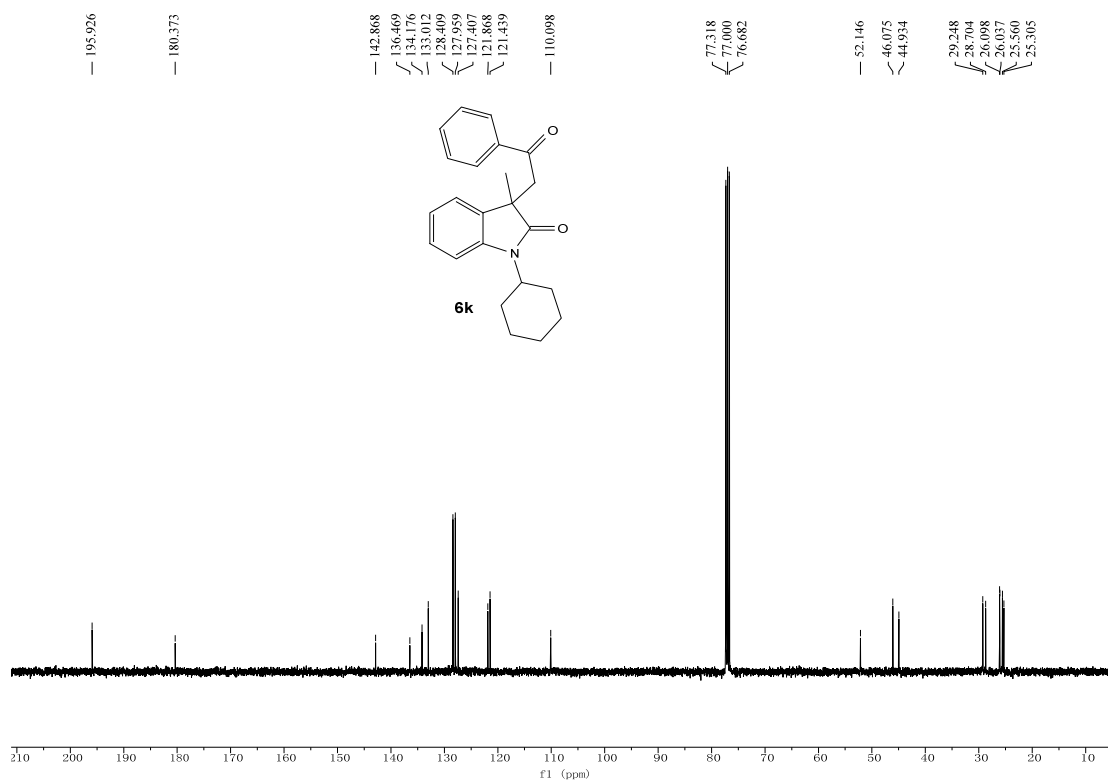

# <sup>1</sup>H and <sup>13</sup>C NMR spectra of **6l**

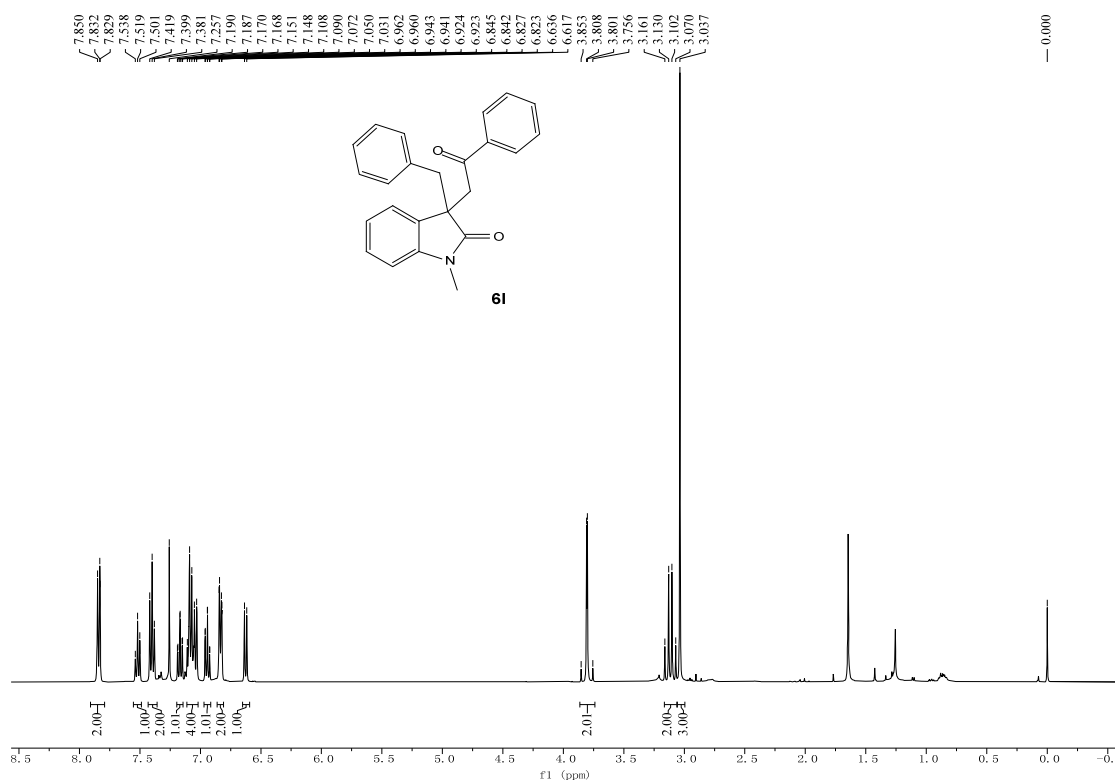

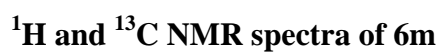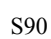

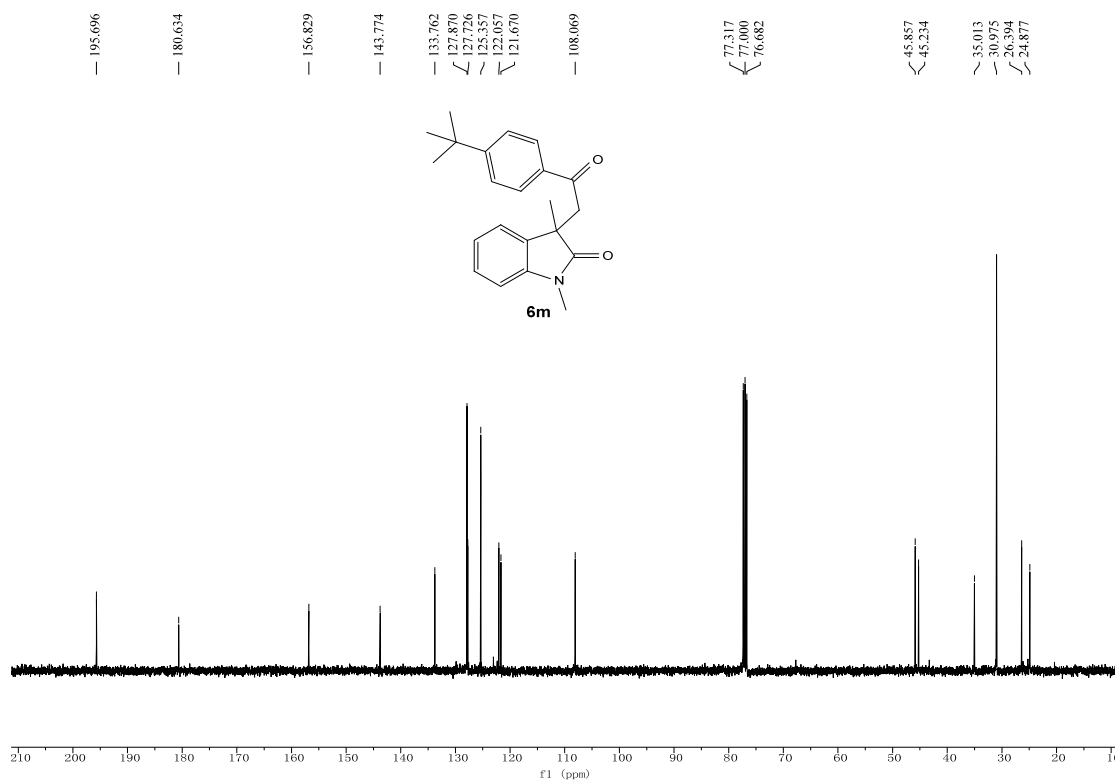

## **<sup>1</sup>H and <sup>13</sup>C NMR spectra of 6n**

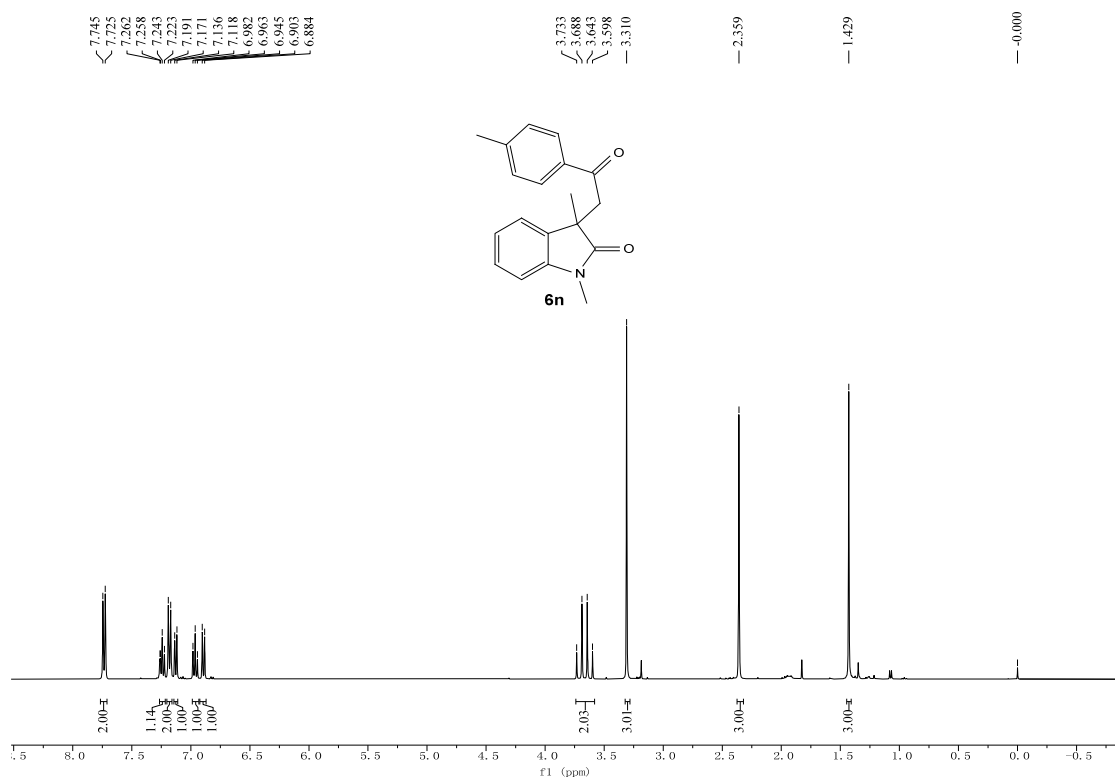

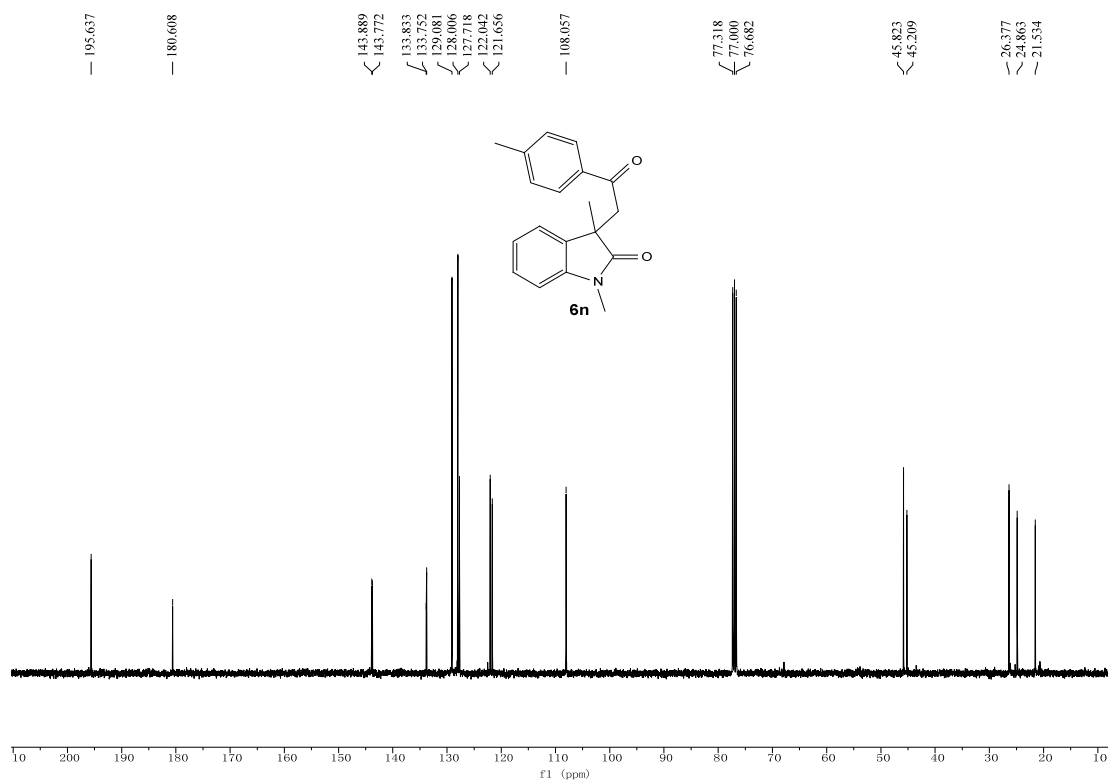

# **$^1\text{H}$ and $^{13}\text{C}$ NMR spectra of 6o**

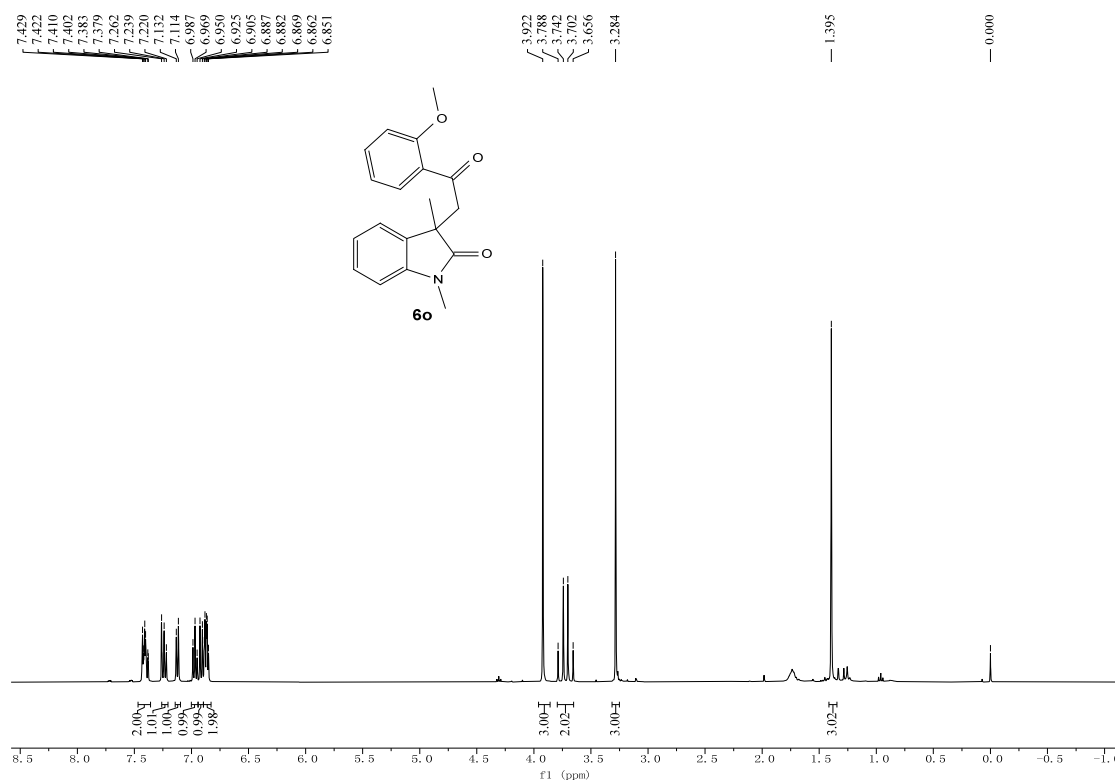

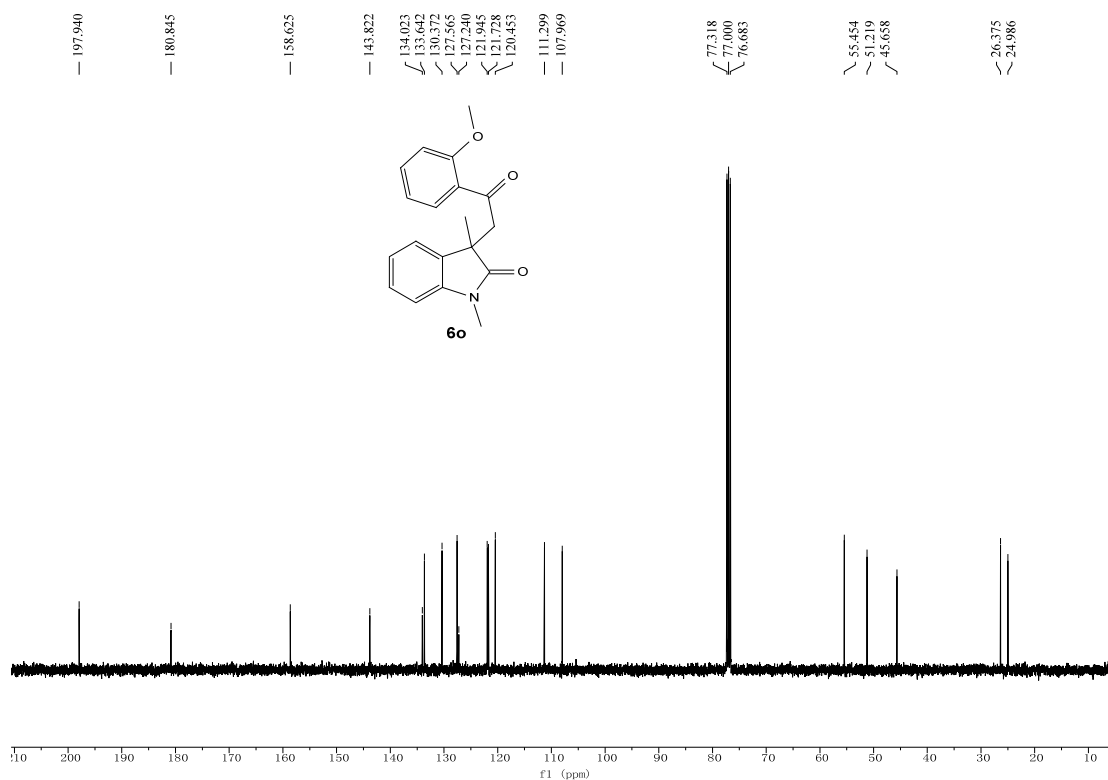

## <sup>1</sup>H and <sup>13</sup>C NMR spectra of 6p

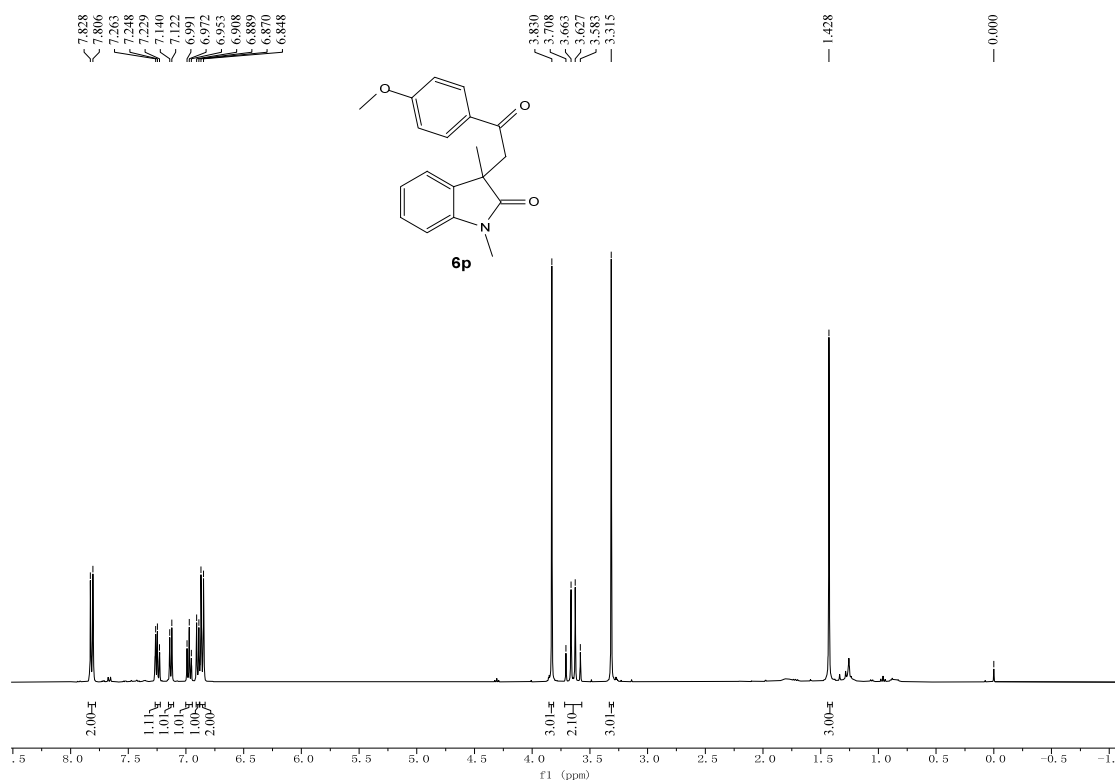

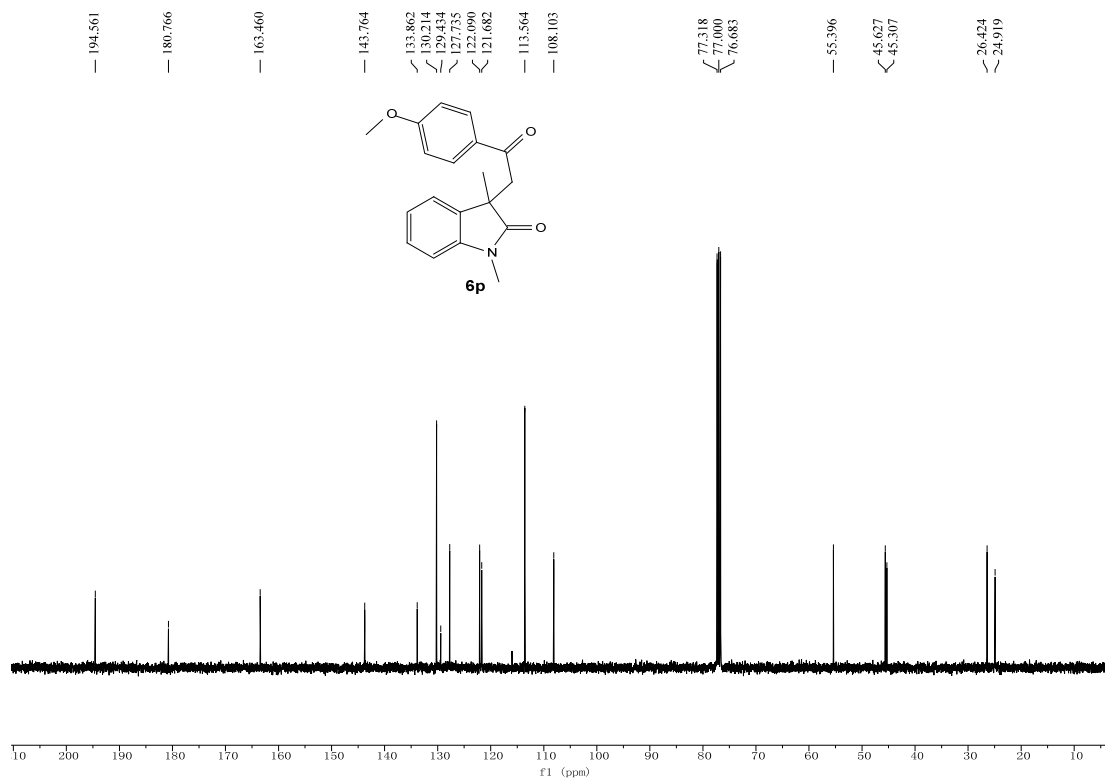

## <sup>1</sup>H and <sup>13</sup>C NMR spectra of 6q

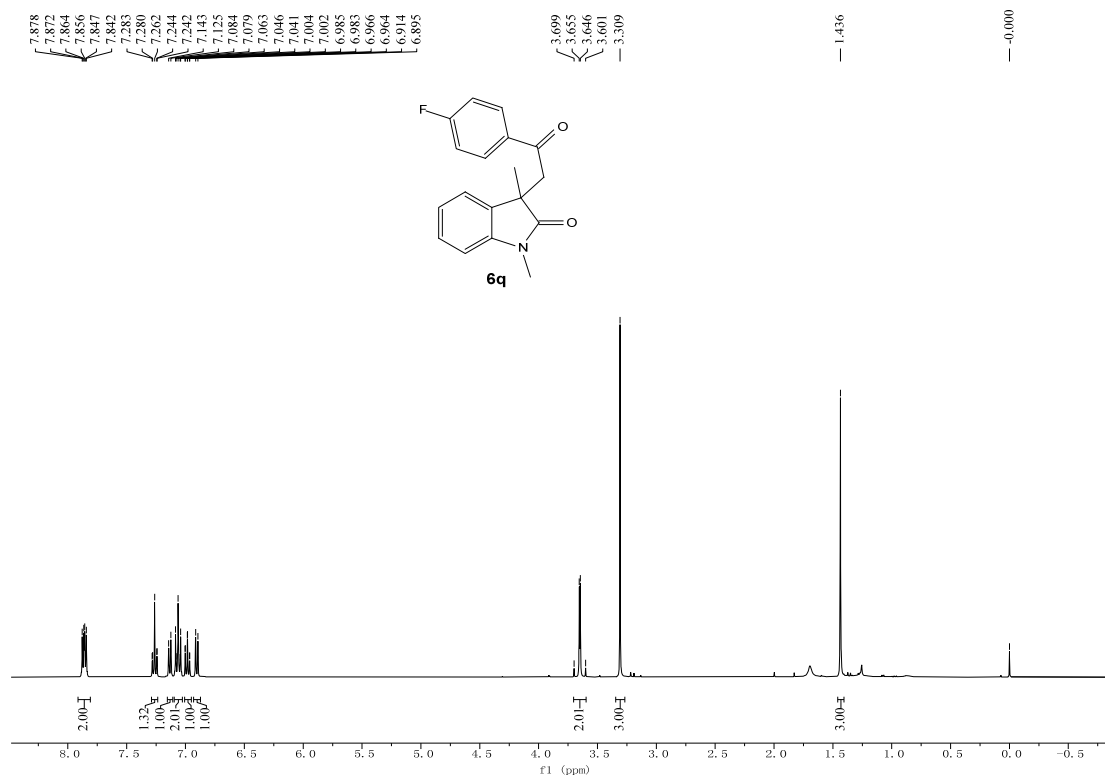

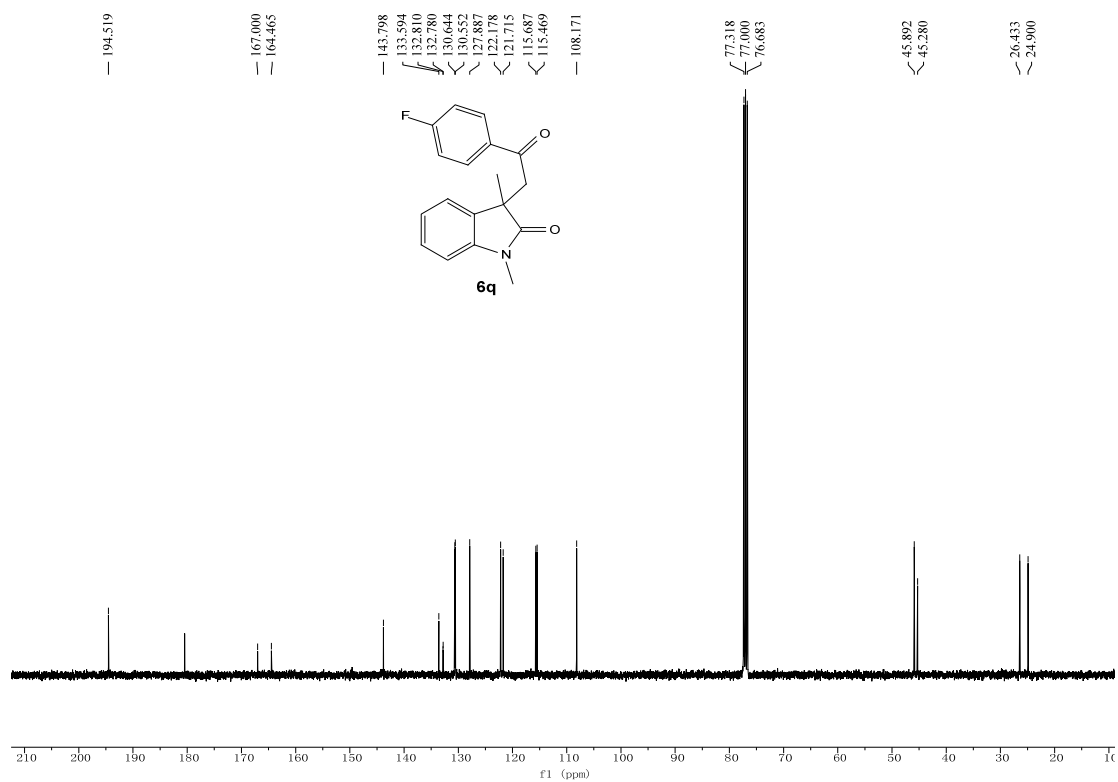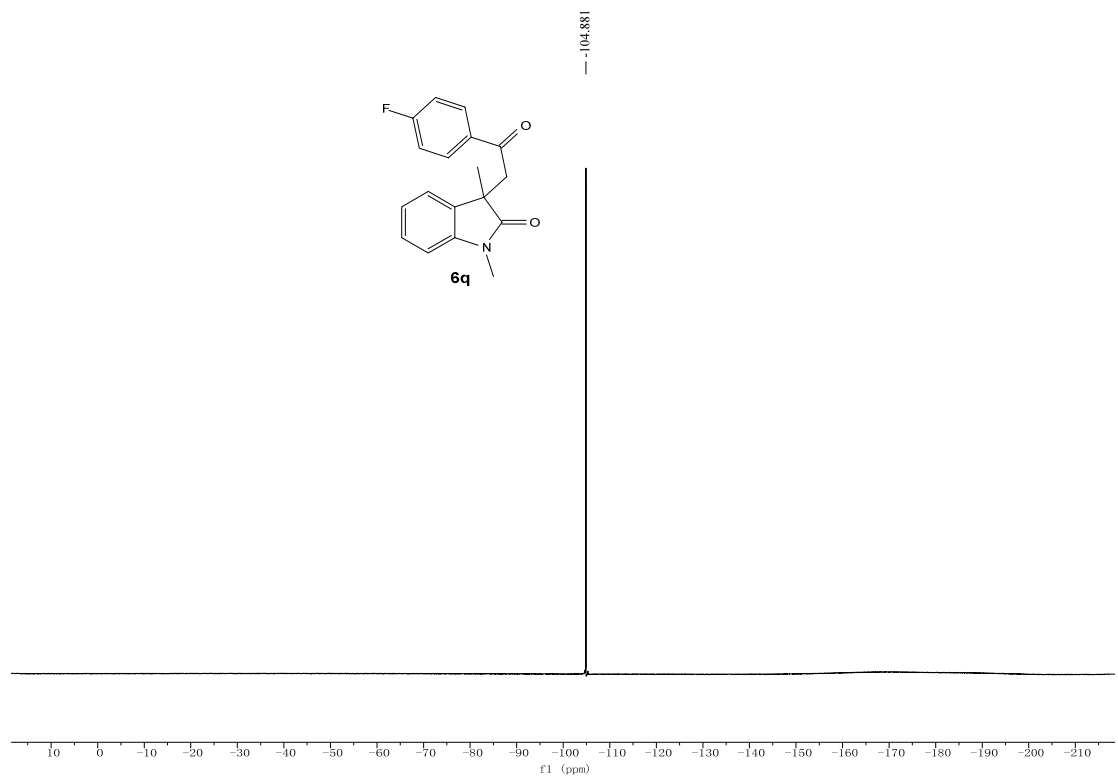

# <sup>1</sup>H and <sup>13</sup>C NMR spectra of 6r

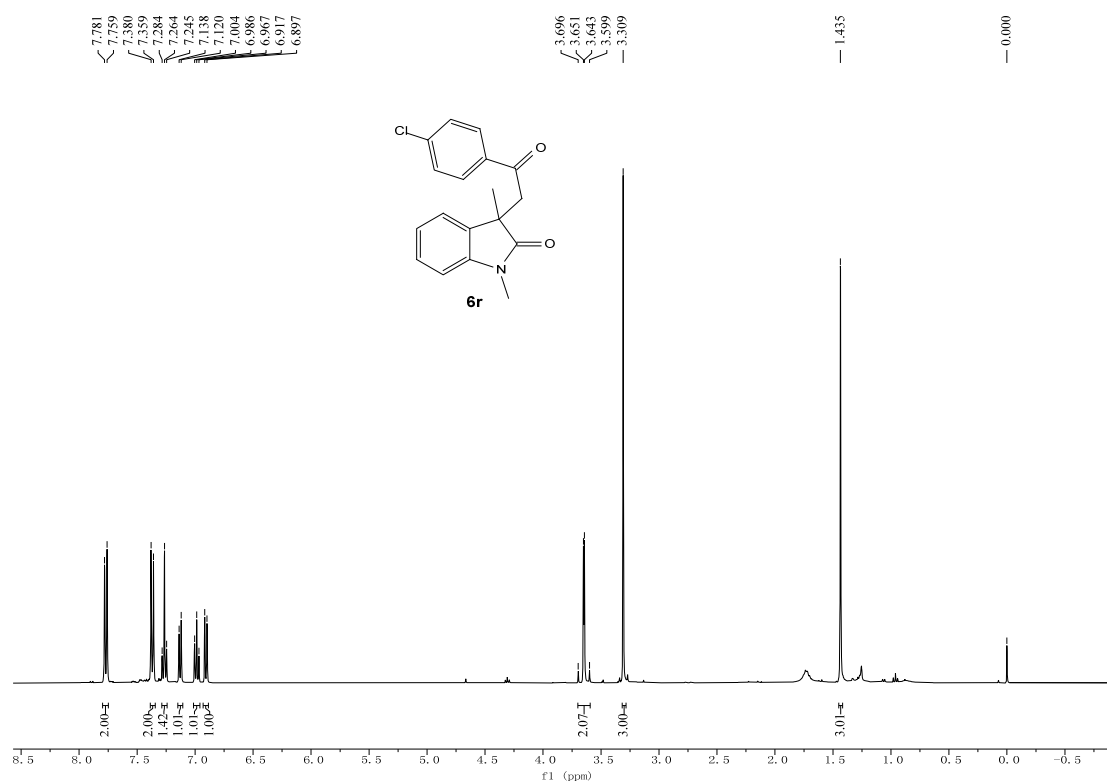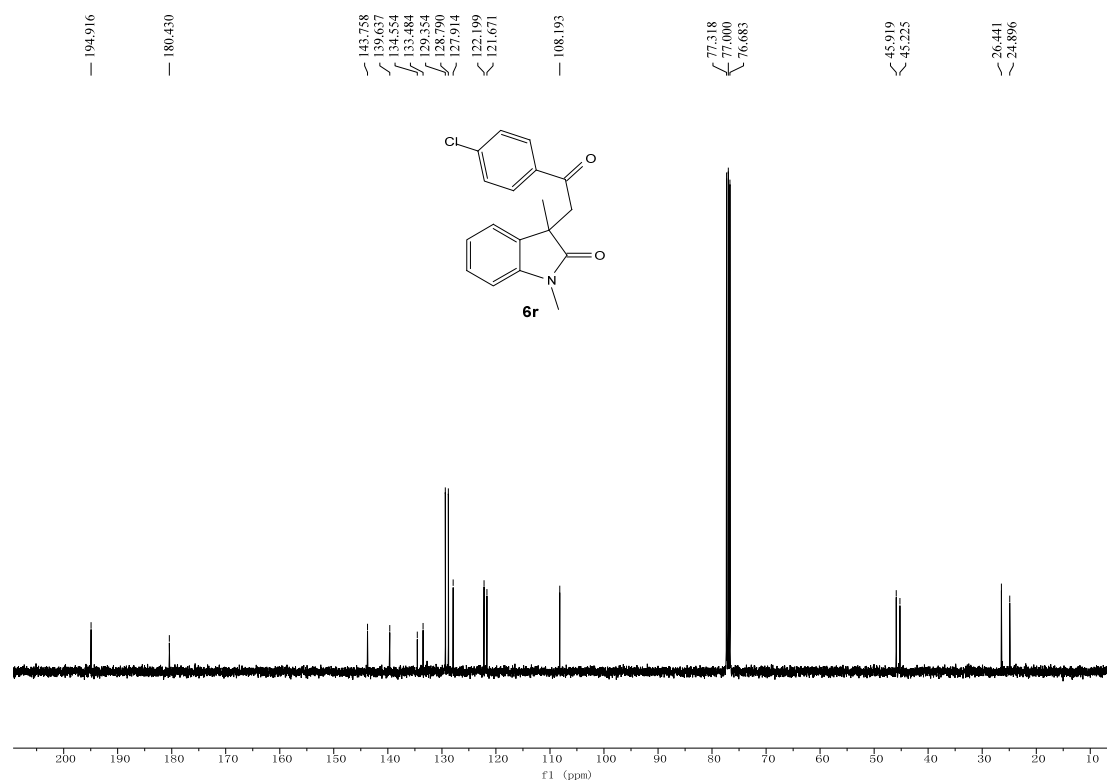

# <sup>1</sup>H and <sup>13</sup>C NMR spectra of 6s

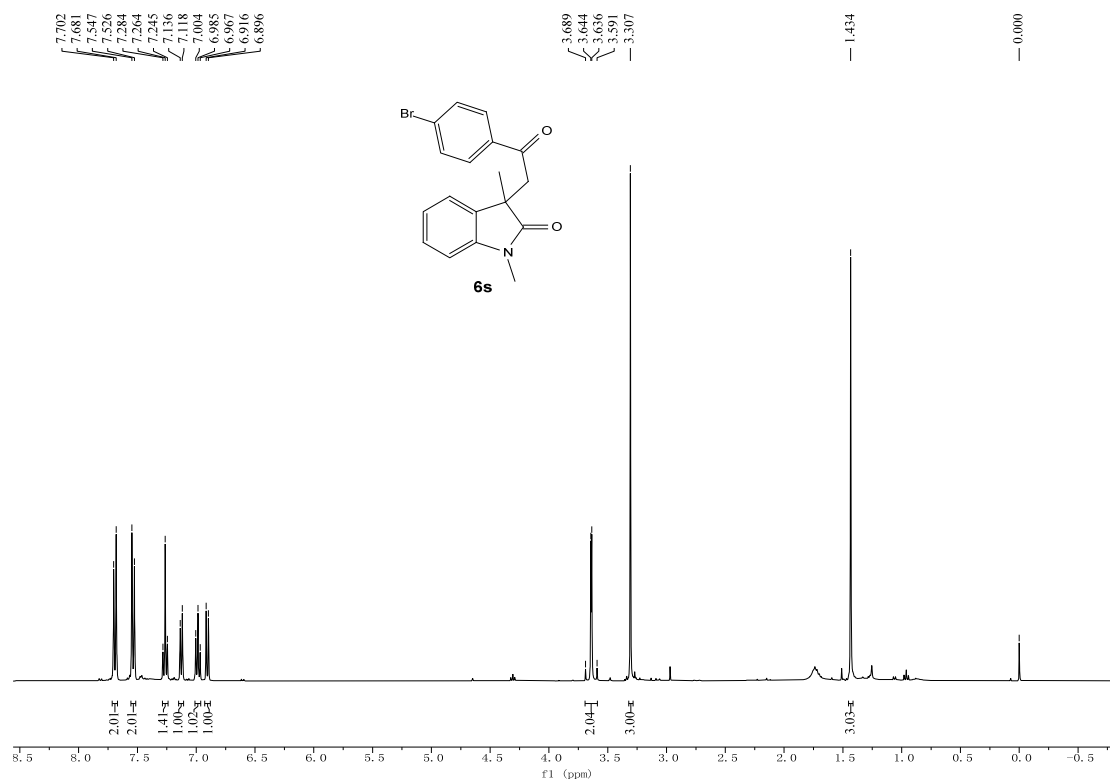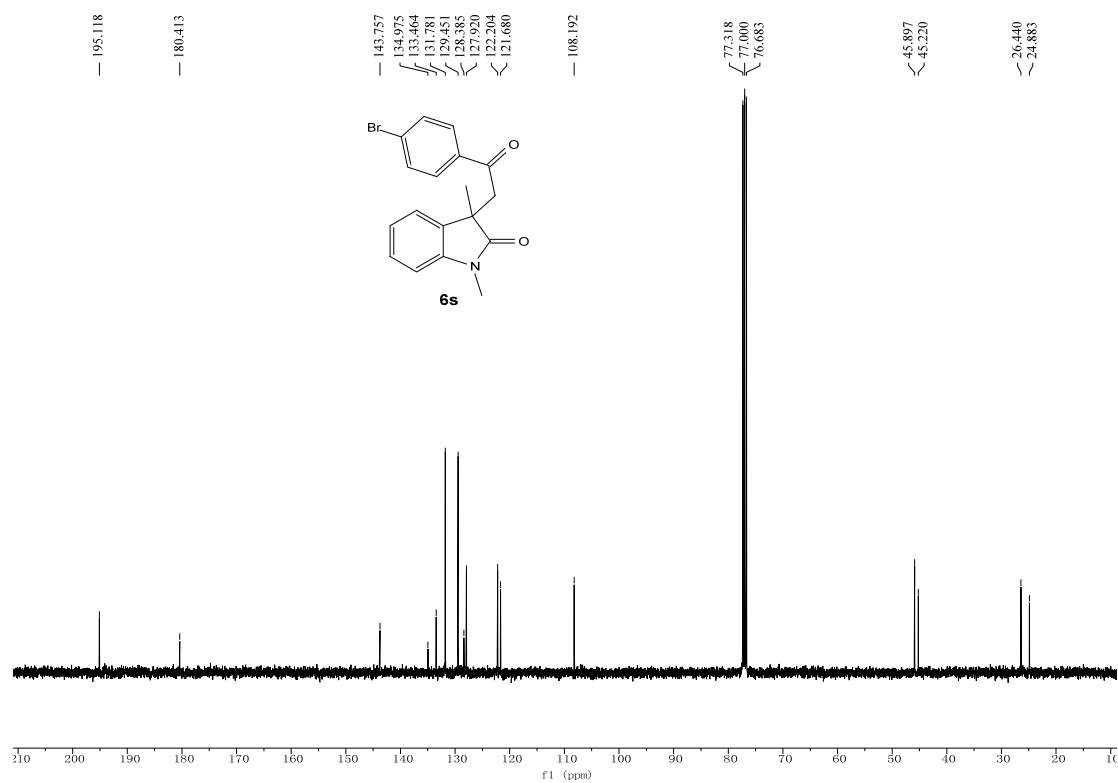

# <sup>1</sup>H and <sup>13</sup>C NMR spectra of 6t

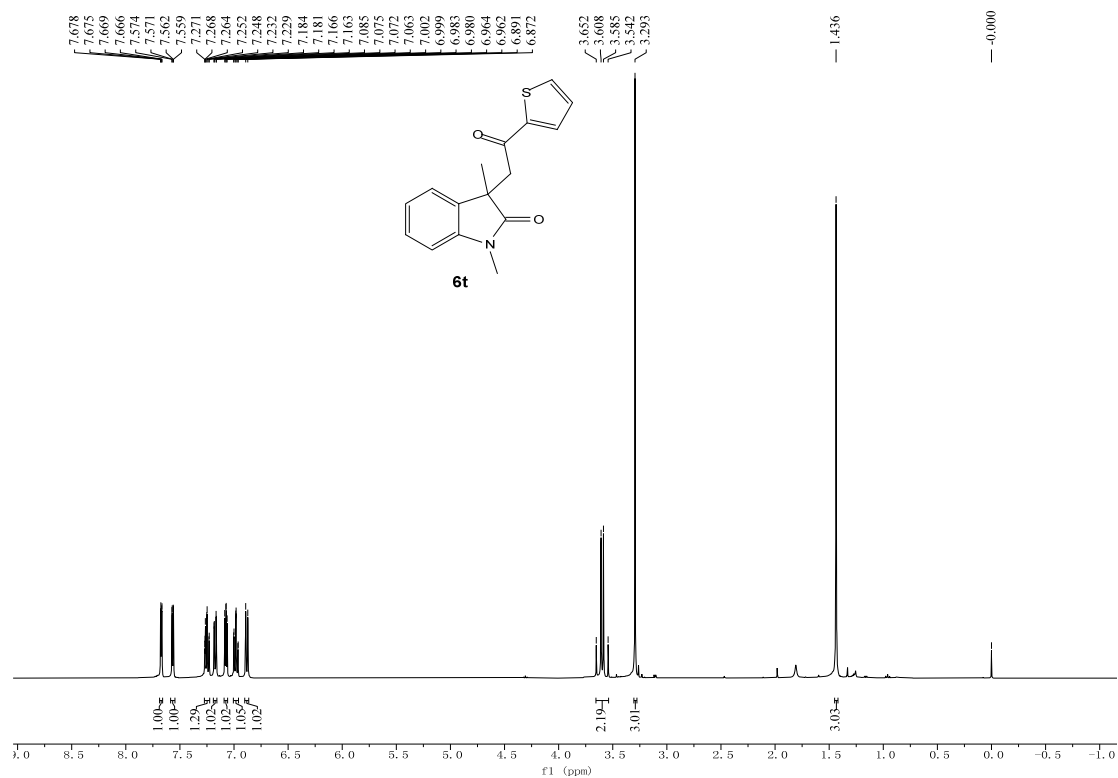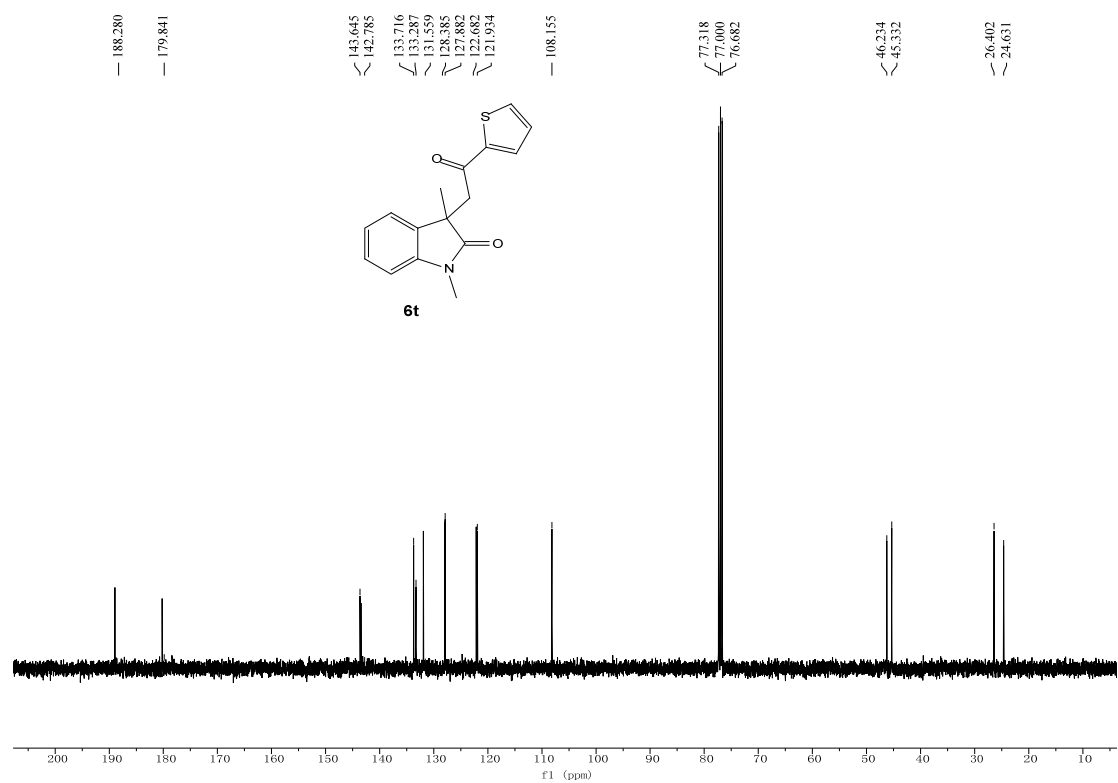

# <sup>1</sup>H and <sup>13</sup>C NMR spectra of 6u

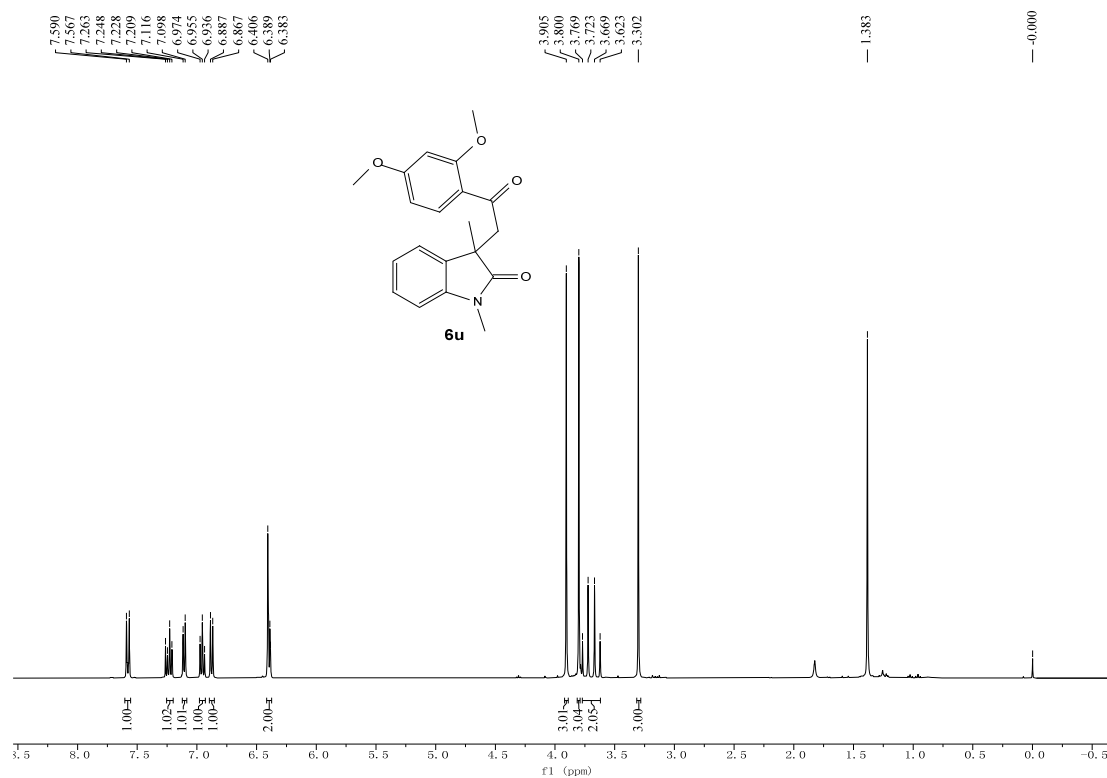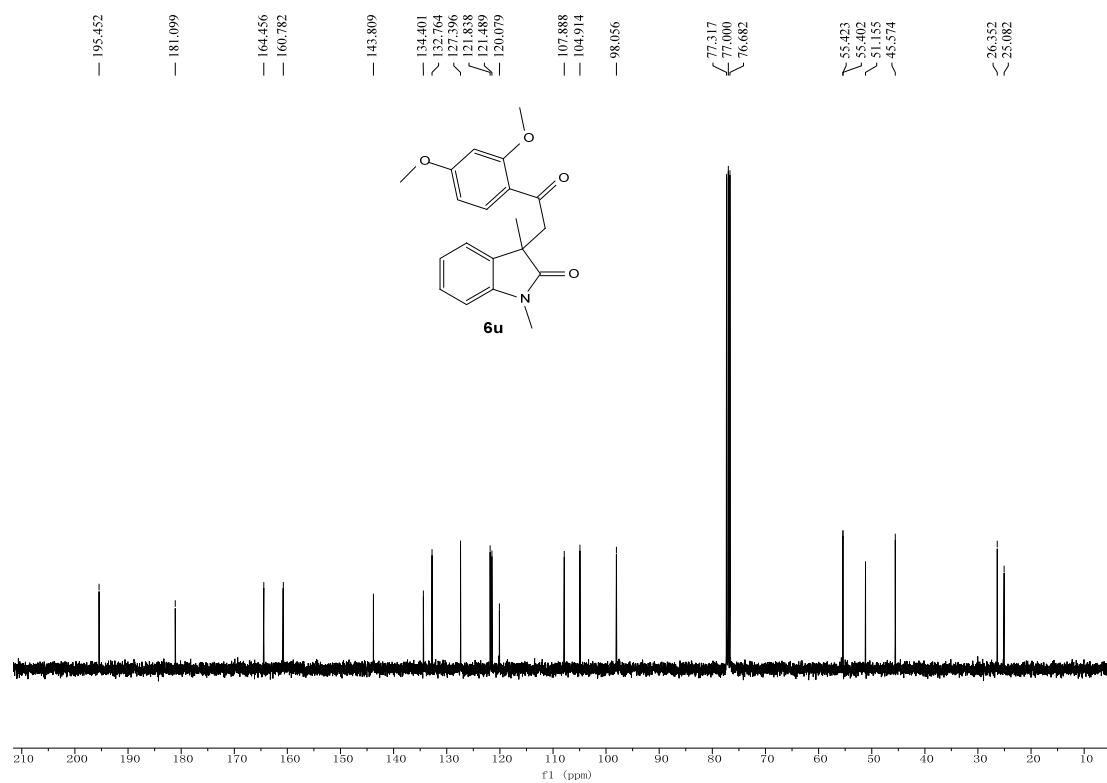

# <sup>1</sup>H and <sup>13</sup>C NMR spectra of 6v

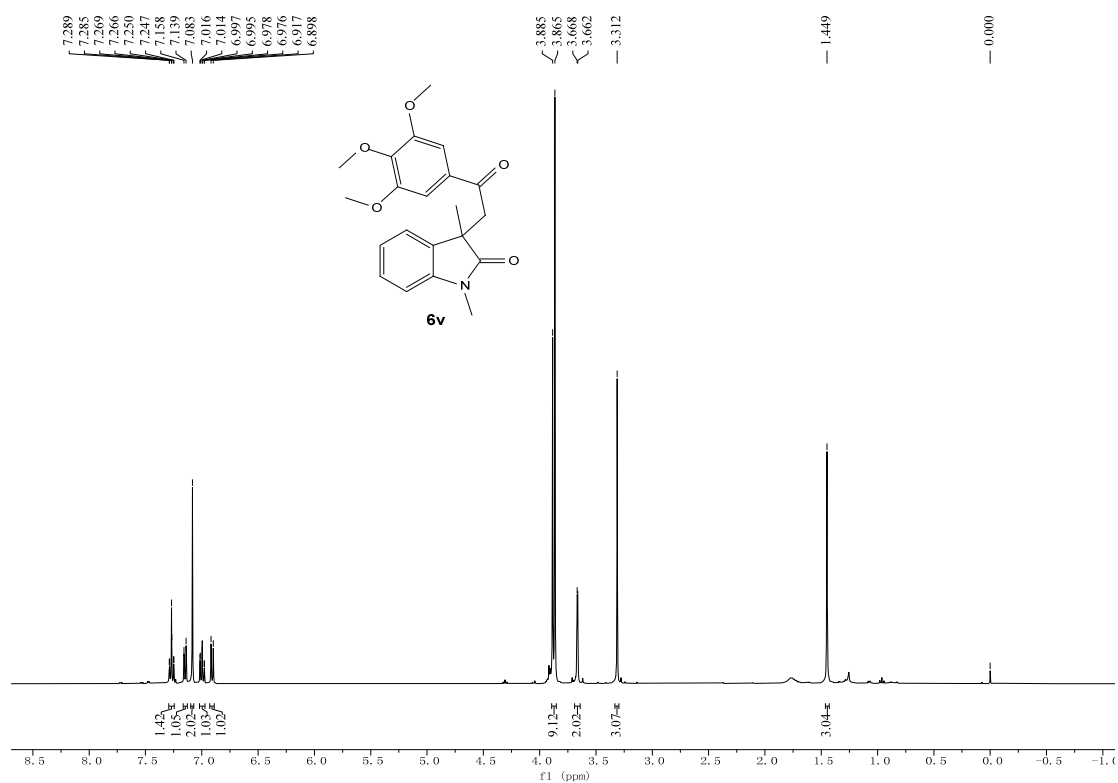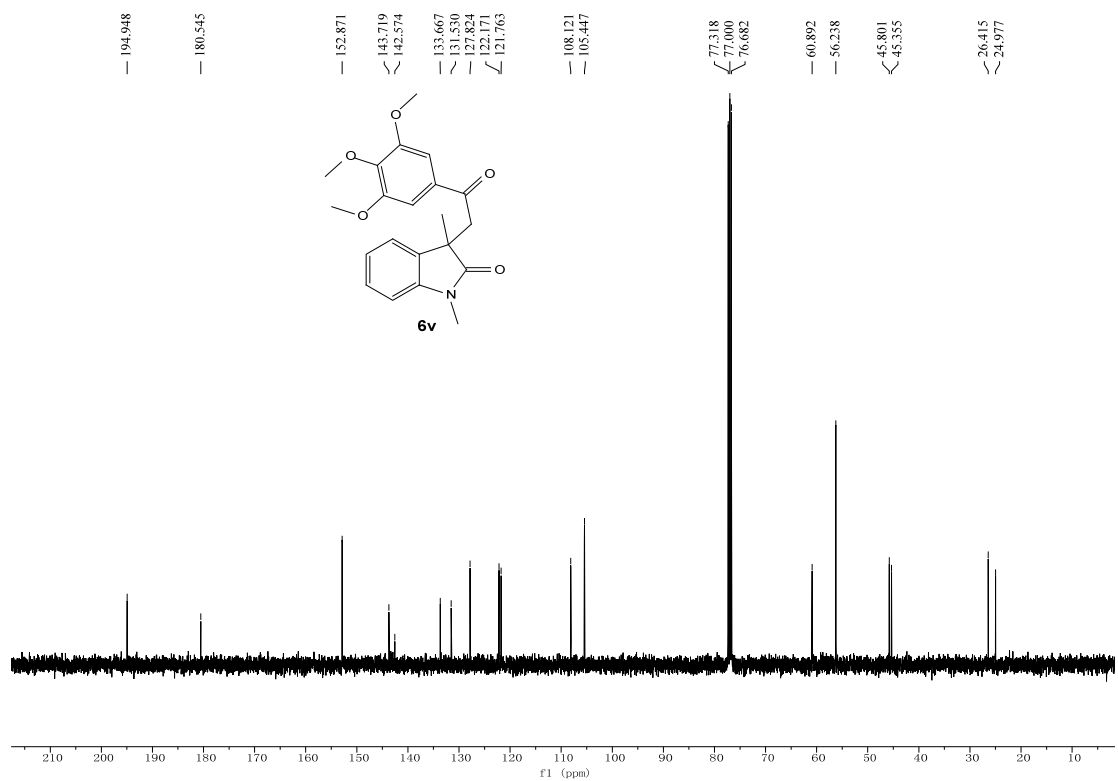

# <sup>1</sup>H and <sup>13</sup>C NMR spectra of 6w

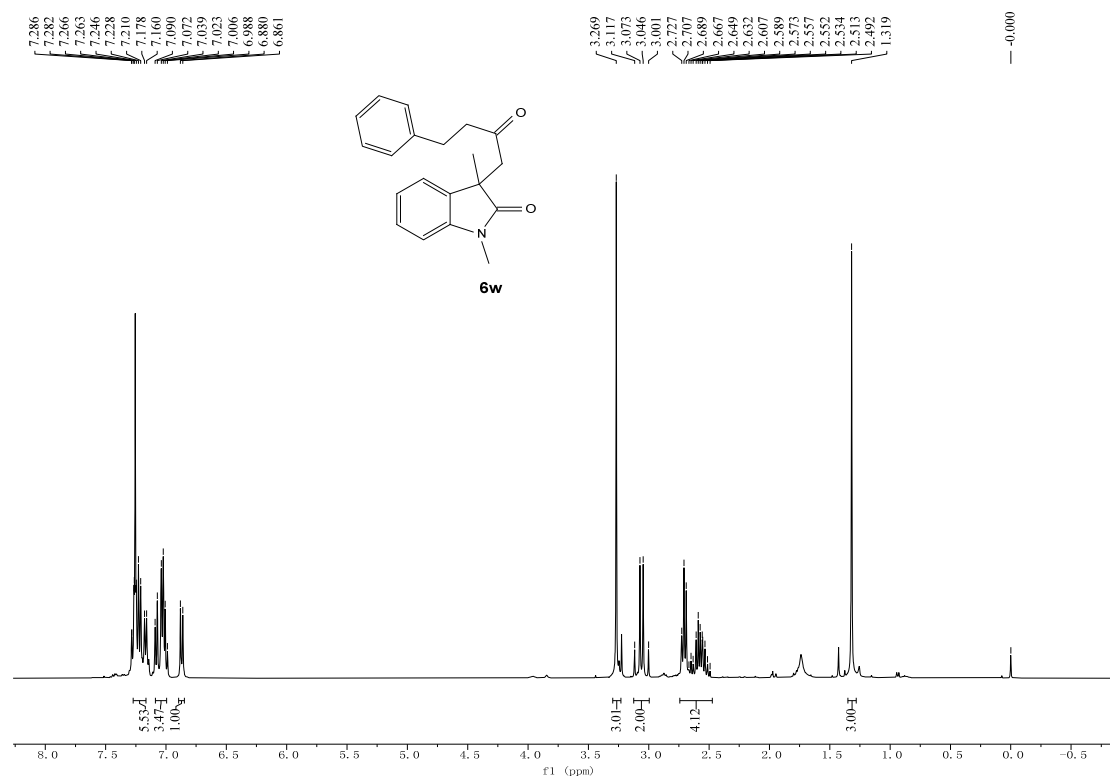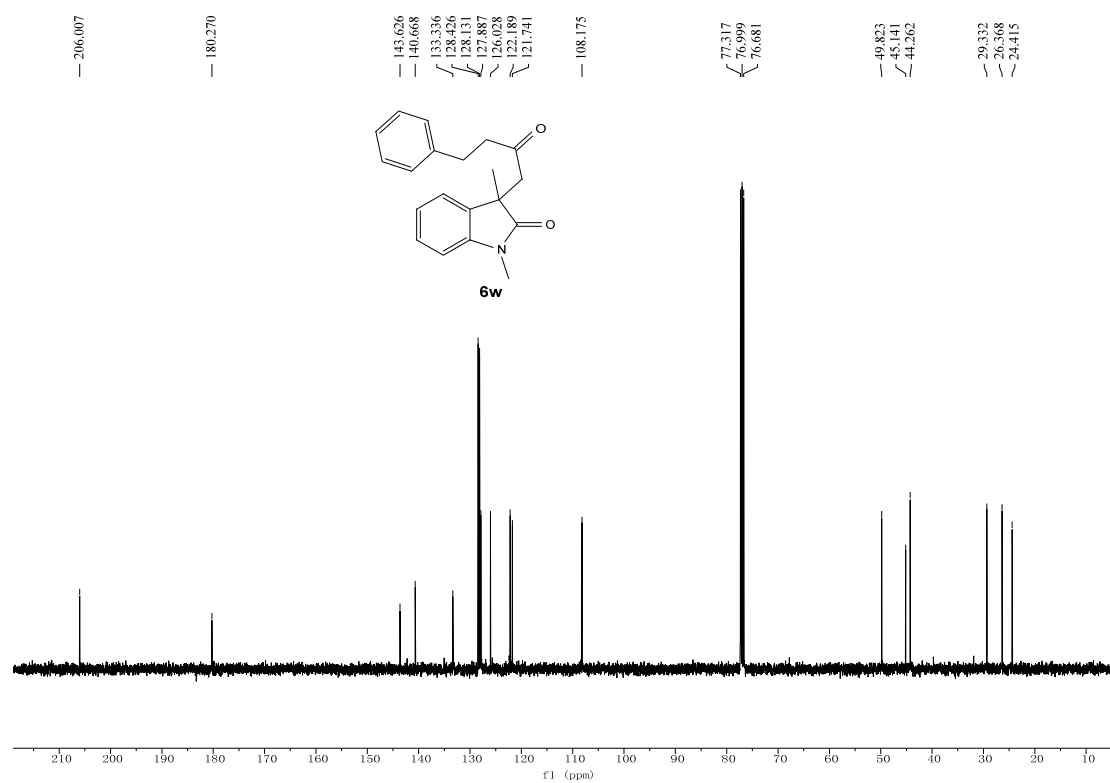

# <sup>1</sup>H and <sup>13</sup>C NMR spectra of 6x

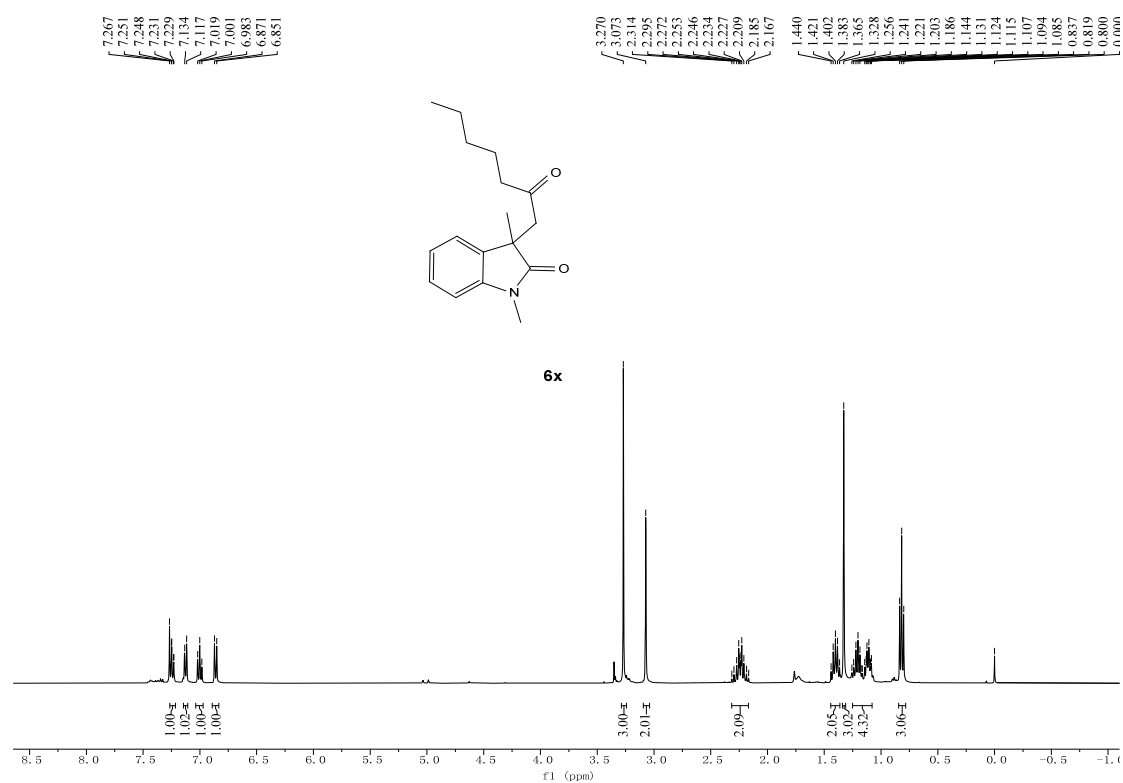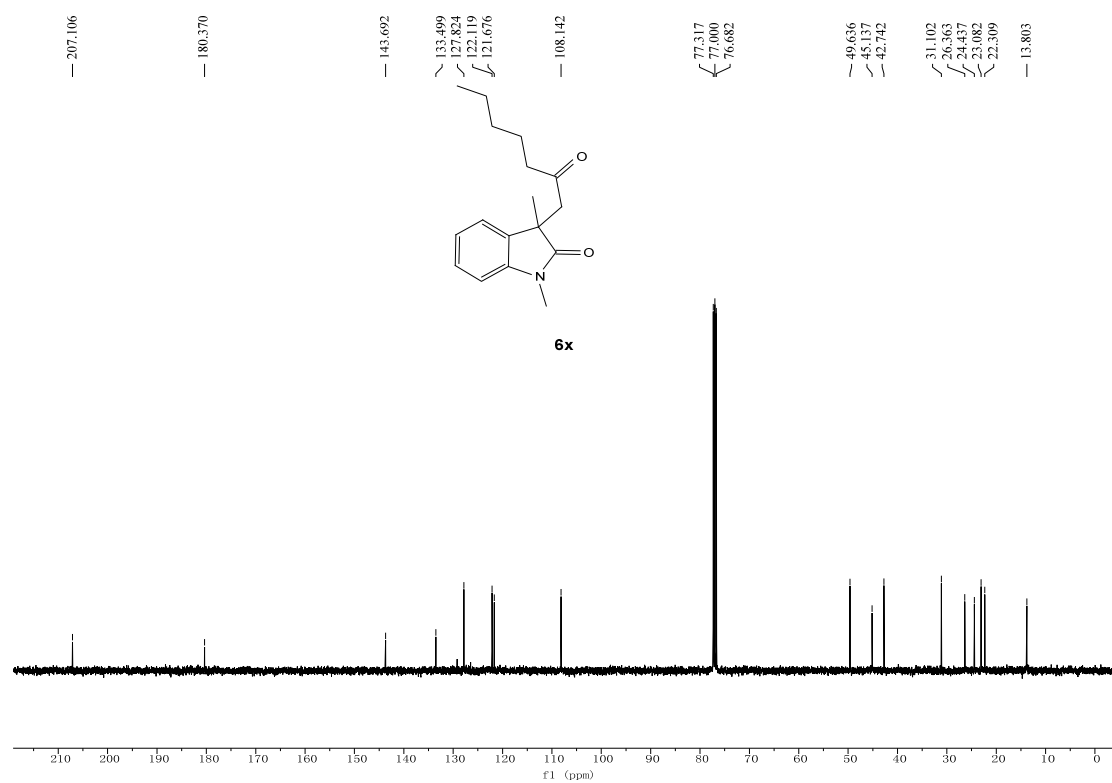

# <sup>1</sup>H and <sup>13</sup>C NMR spectra of 7

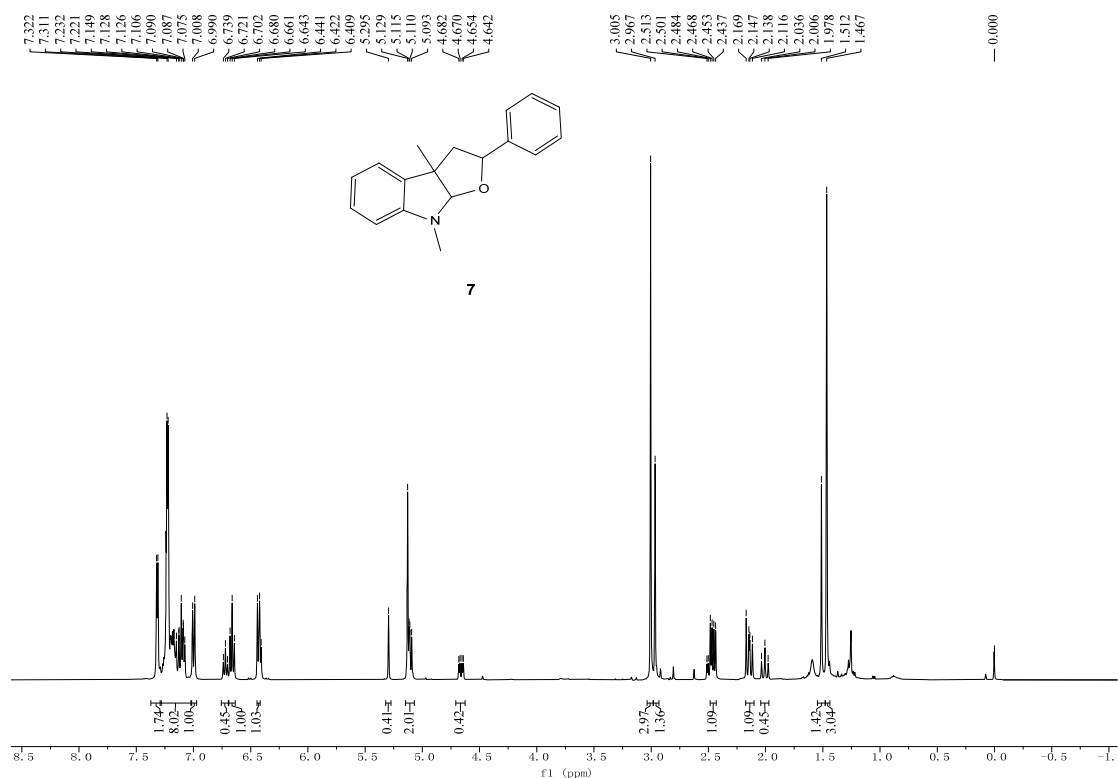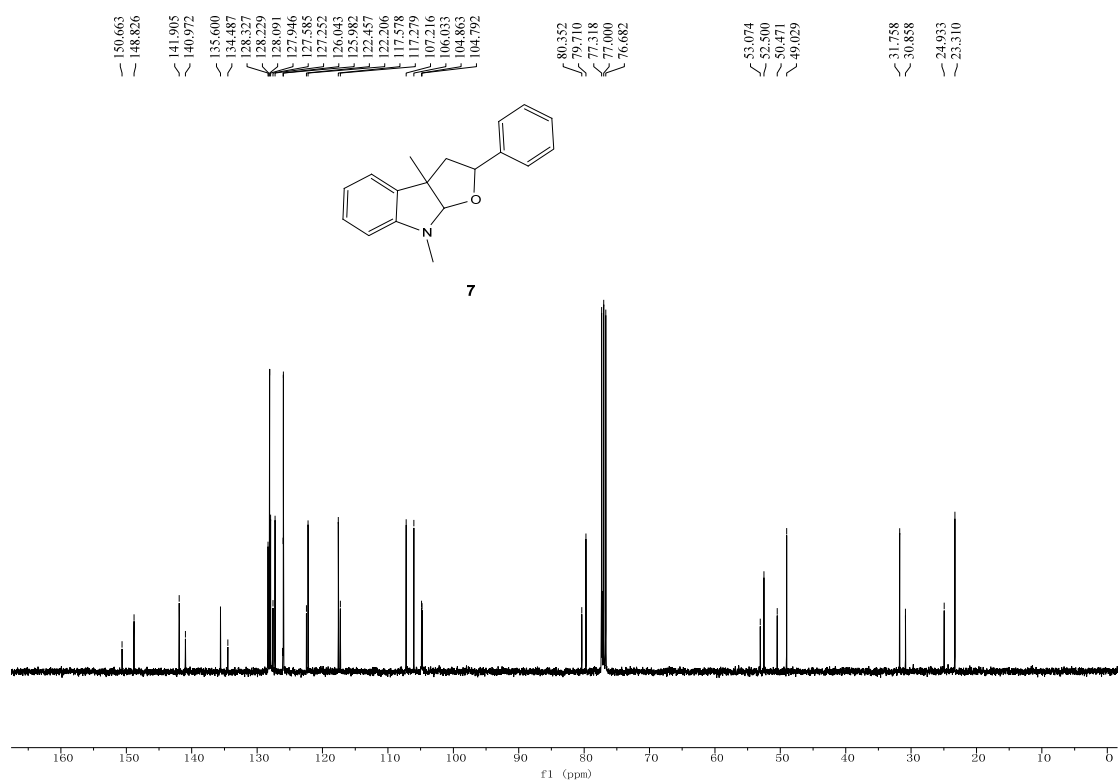

# <sup>1</sup>H and <sup>13</sup>C NMR spectra of 8

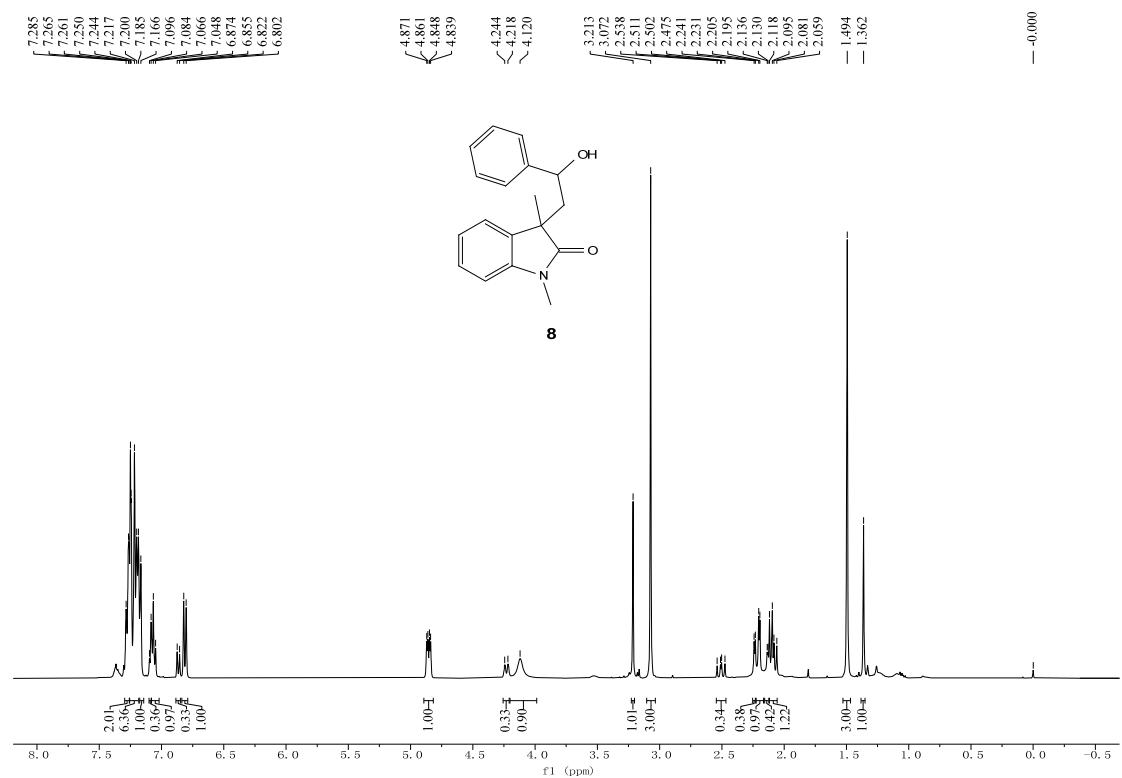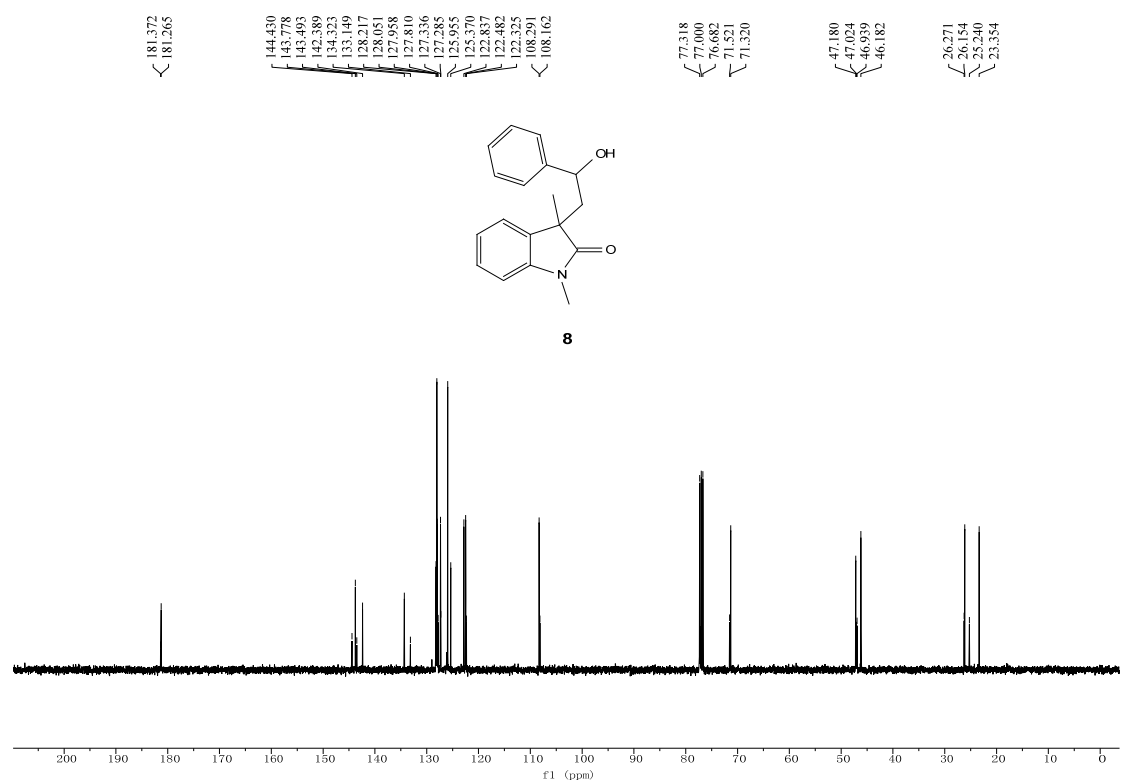

# <sup>1</sup>H and <sup>13</sup>C NMR spectra of 9

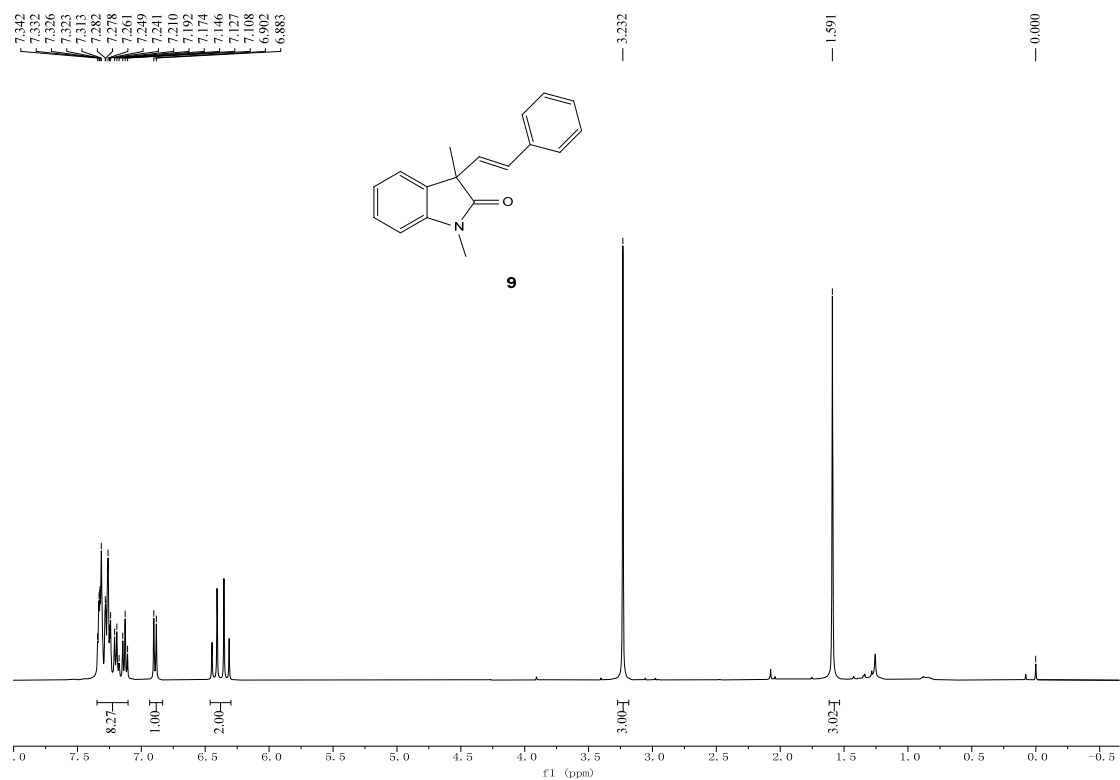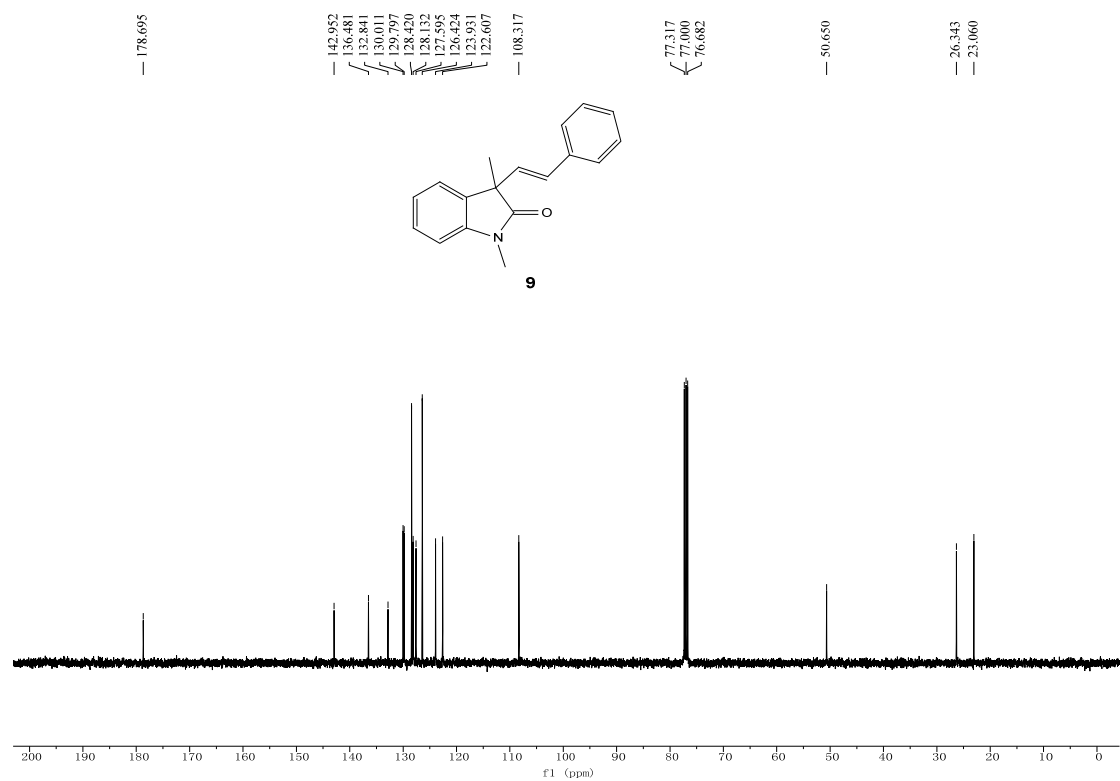

Supplement: d2qo00319h1.pdf [file d2qo00319h1.pdf]
